# Supplementary material for: Development of Proteomic Prediction Models for Transition to Psychotic Disorder in the Clinical High-Risk State and Psychotic Experiences in Adolescence
Source: PubMed Central journal article supplement (PMC7450406; doi:10.1001/jamapsychiatry.2020.2459), 2020-08-26
Supplement: jamapsychiatry-e202459-s001.pdf [file jamapsychiatry-e202459-s001.pdf]

## Supplementary Online Content

Mongan D, Föcking M, Healy C, et al; European Network of National Schizophrenia Networks Studying Gene-Environment Interactions (EU-GEI) High Risk Study Group. Development of proteomic prediction models for transition to psychotic disorder in the clinical high-risk state and psychotic experiences in adolescence. *JAMA Psychiatry*. Published online August 26, 2020. doi:10.1001/jamapsychiatry.2020.2459

### eMethods.

### eReferences.

**eTable 1.** Summary of Support Vector Machine Models

**eTable 2.** List of 69 Baseline EU-GEI Clinical Variables Included in Model 1a, Model 1b, and Model 3

**eTable 3.** Comparison of Baseline Characteristics for CHR Participants Who Attended at Least One Follow-up Interview vs CHR Participants Who Did Not in EU-GEI

**eTable 4.** Comparison of Characteristics for Participants Included in Initial Experiment (N=133) From Total EU-GEI Clinical High-Risk Cohort (N=344)

**eTable 5.** Results of ANCOVA (Adjusted for Age, Sex, BMI, and Years in Education) and Fold Changes (CHR-T vs CHR-NT) for Proteins Identified in EU-GEI Baseline Plasma Samples in the Initial Experiment

**eTable 6.** Coefficients of Variation for Proteins Across Quality Control Standards in EU-GEI Initial Experiment

**eTable 7.** Summary of Protein-Protein Interactions Identified From the BIOGRID Database for Significantly Differentially Expressed Proteins Between CHR-T and CHR-NT in EU-GEI Initial Experiment

**eTable 8.** Functional Enrichment Analysis of Differentially Expressed Proteins (Following False Discovery Rate Correction) Between CHR-T and CHR-NT in EU-GEI Initial Experiment: 6 KEGG Pathways Significantly Enriched

**eTable 9.** Results of Enzyme-Linked Immunosorbent Assays in CHR-T and CHR-NT Participants in EU-GEI Initial Experiment

**eTable 10.** Correlations Between 5 Proteins Assessed by ELISA and by Mass Spectrometry in EU-GEI Initial Experiment

**eTable 11.** Comparison of Characteristics for Participants Included in Replication Experiment (N=135) From Total EU-GEI Clinical High-Risk Cohort (N=344)

**eTable 12.** Sample Characteristics for CHR-T and CHR-NT Groups in the Replication Experiment

**eTable 13.** Results of ANCOVA (Adjusted for Age, Sex, BMI, Years in Education, Tobacco Use, and Ethnicity) and Fold Changes (CHR-T vs CHR-NT) for Proteins Identified in EU-GEI Baseline Plasma Samples in the Replication Experiment

**eTable 14.** Sample Characteristics for ALSPAC Subsample Cases and Controls

**eTable 15.** Results of ANCOVA (Adjusted for Sex, BMI, and Maternal Social Class) and Fold Changes (Definite PEs at 18 vs no PEs at 18) for Proteins Identified in ALSPAC Age 12 Plasma Samples

© 2020 American Medical Association. All rights reserved.

**eTable 16.** Ten Percent Highest-Weighted Features for Model S2 (Support Vector Machine Model Predicting Functional Outcome at 24 Months in EU-GEI)

**eTable 17.** Table Comparing Performance Metrics for Multiclass Site Prediction Models Based on 69 Clinical Features From Model 1b

**eTable 18.** Table Comparing Performance Metrics for Multiclass Site Prediction Models Based on 166 Proteomic Features From Model 1c

**eTable 19.** Comparison of Performance Metrics for Uncorrected vs Corrected Support Vector Machine Models

**eTable 20.** Proteins Differentially Expressed in CHR-T vs CHR-NT on ANCOVA ( $P < .05$ ) in EU-GEI Baseline Plasma Samples in the Initial and Replication Experiment and Predicted Systemic Impact on Coagulation and Complement Activation and Regulation

**eTable 21.** Table Summarizing Directionality of Effect of Ten Percent Highest-Weighted Features in Model 1a (EU-GEI Initial Experiment), Model 3 (EU-GEI Replication Experiment), and Model 4 (ALSPAC Proteomic Data)

**eFigure 1.** Derivation and Testing of Model 2b: Parsimonious (10-Predictor) Proteomic Model

**eFigure 2.** STRING Functional Protein Association Network for Proteins Differentially Expressed (Following False Discovery Rate Correction) Between CHR-T and CHR-NT in EU-GEI Initial Experiment

**eFigure 3.** Mean Algorithm Scores and Class Predictions (A) and Receiver Operating Characteristic Curve (B) for Model 1b: Clinical Data

**eFigure 4.** Mean Algorithm Scores and Class Predictions (A) and Receiver Operating Characteristic Curve (B) for Model 1c: Proteomic Data

**eFigure 5.** Mean Algorithm Scores and Class Predictions (A) and Receiver Operating Characteristic Curve (B) for Model 2a: Proteomic (Non-London)

**eFigure 6.** Mean Algorithm Scores and Class Predictions (A) and Receiver Operating Characteristic Curve (B) for Model 2b: Parsimonious (10-Predictor) Proteomic Model, Training Data (Non-London)

**eFigure 7.** Mean Algorithm Scores and Class Predictions (A) and Receiver Operating Characteristic Curve (B) for Model 3: Replication

**eFigure 8.** Mean Algorithm Scores and Class Predictions (A) and Receiver Operating Characteristic Curve (B) for Model 4: ALSPAC Proteomic Data

**eFigure 9.** Mean Algorithm Scores and Class Predictions (A) and Receiver Operating Characteristic Curve (B) for Model S1: ELISA

**eFigure 10.** Mean Algorithm Scores and Class Predictions (A) and Receiver Operating Characteristic Curve (B) for Model S2: Functional Outcome

**eFigure 11.** Model 1b (Clinical Data) Decision Scores Stratified by EU-GEI Site

**eFigure 12.** Model 1c (Proteomic Data) Decision Scores Stratified by EU-GEI Site

© 2020 Mongan D et al. *JAMA Psychiatry*.

**eFigure 13.** Age Stratified by EU-GEI Site

**eFigure 14.** Years in Education Stratified by EU-GEI Site

**eFigure 15.** Body Mass Index Stratified by EU-GEI Site

**eFigure 16.** Sex Stratified by EU-GEI Site

**eFigure 17.** General Assessment of Functioning Symptoms Subscale Stratified by EU-GEI Site

**eFigure 18.** General Assessment of Functioning Disability Subscale Stratified by EU-GEI Site

**eFigure 19.** Scale for Assessment of Negative Symptoms (Composite Score) Stratified by EU-GEI Site

**eFigure 20.** Scale for Assessment of Negative Symptoms (Global Score) Stratified by EU-GEI Site

**eFigure 21.** Brief Psychiatric Rating Scale Score Stratified by EU-GEI Site

**eFigure 22.** Montgomery-Asberg Depression Rating Scale Score Stratified by EU-GEI Site

**eFigure 23.** Multiclass Receiver Operating Curves for Site Prediction Based on 69 Clinical Features From Model 1b

**eFigure 24.** Multiclass Receiver Operating Curves for Site Prediction Based on 166 Proteomic Features From Model 1c

**eFigure 25.** Illustration of the Complement and Coagulation Pathways Depicting the Impact Model of Differentially Expressed Complement and Coagulation Proteins in CHR-T vs CHR-NT

This supplementary material has been provided by the authors to give readers additional information about their work.

© 2020 American Medical Association. All rights reserved.

## eMethods

### 1. Sample preparation: further details

#### 1.1 Sample collection

Blood samples were collected according to a standardised protocol across the participating EU-GEI sites. BD Vacutainer P100 tubes (BD Biosciences, USA) were used for sample collection. Samples were stored on ice for a maximum of 90 minutes, then centrifuged at 2500g for 20 minutes. ALSPAC samples were collected into heparin Sarstedt S-Monovette tubes (Sarstedt, Germany) and stored on ice for a maximum of 90 minutes until processed. In both studies, participants were non-fasting and there were no restrictions regarding time of sample collection. Aliquots of plasma were stored in a -80°C freezer until processing for proteomic analysis as described below. All samples were subject to one freeze-thaw cycle prior to analysis. The standard quality of the plasma samples was ensured by assessing the overall MS protein profile to facilitate the identification of outlier protein expression profiles.

#### 1.2 Protein depletion of plasma samples

To improve the dynamic range for proteomic analysis, 40µl of plasma from each case in all samples was immunodepleted of the 14 most abundant proteins ( $\alpha$ -1-antitrypsin, A1-acid glycoprotein, Serum Albumin,  $\alpha$ 2-macroglobulin, Apolipoprotein A-I, Apolipoprotein A-II, Complement C3, Fibrinogen  $\alpha/\beta/\gamma$ , Haptoglobin, IgA, IgG, IgM, Transthyretin, and Serotransferrin), using the Agilent Hu14 Affinity Removal System (MARS) coupled to a High Performance Liquid Chromatography (HPLC) system.<sup>1</sup> Protein depletion was undertaken according to the manufacturer's instructions and buffer exchange was performed with 50mM ammonium bicarbonate using spin columns with a 10kDA-molecular weight cut-off (Merck Millipore). Prior to sample preparation for mass spectrometry (MS), the protein concentration was determined using a Bradford Assay<sup>2</sup> according to the manufacturer's (BioRad) instructions.

#### 1.3 Sample preparation for mass spectrometry

Protein digestion and peptide purification was performed as previously described.<sup>3</sup> For quality control (QC), an equal aliquot from each protein digest in the experiment was pooled into one sample for use as an internal QC. This QC standard was injected 3 times at the beginning of the MS study to condition the column, and after every 10 injections throughout the experiment to monitor the MS performance.

## **2. Discovery proteomic analysis using data dependent acquisition (DDA): further methodological details**

All samples were injected on a Thermo Scientific Q Exactive mass spectrometer connected to a Dionex Ultimate 3000 (RSLCnano) chromatography system. Tryptic peptides (5µl of digest) from each sample were loaded onto a fused silica emitter (75 µm ID), pulled using a laser puller (Sutter Instruments P2000), packed with UChrom C18 (1.8 µm) reverse phase media (nanoLCMS Solutions LCC) and separated by an increasing acetonitrile gradient over 90 minutes at a flow rate of 250 nL/min. The mass spectrometer was operated in data dependent TopN 8 mode, with the following settings: mass range 300-1600Th; resolution for MS1 scan 70000; AGC target 3e6; resolution for MS2 scan 17500; AGC target 2e4; charge exclusion unassigned, 1; dynamic exclusion 40 s. The peptide sequences used to match to parent proteins in the human FASTA database are provided in the eAppendix. The co-efficients of variation (CV) across the injected pooled QC standards for the 35 differentially expressed proteins in the initial experiment are provided in eTable 6. This table also provides the CV for proteins not among these 35 that were either among the 10% highest-weighted proteins in Model 1a, or among the 10 proteins included in Model 2b. The majority of these (80%) had CV <20%.

## **3. Confirmatory analyses using enzyme-linked immunosorbent assays (ELISA)**

To validate our proteomic differential expression findings using another method, we assessed several human complement and coagulation proteins and apolipoproteins in the plasma samples of the same CHR-T and CHR-NT subjects who contributed to the initial EU-GEI proteomic experiment using enzyme-linked immunoassays (ELISA). Candidate proteins were chosen on the basis of differential expression and machine learning results as well as previous studies from our group<sup>(4-7)</sup>. Specifically, we tested human α-2 macroglobulin (Abcam ab108888, 1:400), apolipoprotein E (ThermoFisher Scientific, EHAPOE, 1:2,000), Complement C1q (Abcam ab170246, 1:100,000), Complement C1r (Abcam ab170245, 1:40,000), Complement C4 binding protein (Abcam, ab222866, 1:40,000), Complement C8 (Abcam ab 137971, 1:10,000), complement factor H (Hykult Biotech HK342, 1:10,000), immunoglobulin M (Abcam, ab137982, 1:60,000), and plasminogen (Abcam ab108893, 1:20,000). Each kit had an optimised and defined sample dilution recommendation. The assays were performed according to the manufacturer's instructions to ensure sample concentrations measured would fall in the linear portion of the standard curve in which analyte

concentration can be determined accurately. Each plate contained at least 8 wells in duplicate used for a standard curve of known protein concentrations. The assays have been used reliably in other studies.<sup>8-20</sup> Results are provided in eTable 9. With respect to concordance with the mass spectrometry data, ELISA and mass spectrometry results were available for 5 proteins (alpha-2-macroglobulin, plasminogen, complement component 1r, complement factor H and apolipoprotein E) of which 3 were significantly positively correlated (alpha-2-macroglobulin, plasminogen and apolipoprotein E); see eTable 10.

## 4. Bioinformatics and statistical analysis: further details

### 4.1 Predictive models

We used Neurominer v.1.0 (<https://www.pronia.eu/neurominer/>) for MatLab 2018a (MathWorks Inc.) to develop support vector machine (SVM) models. For all models, hyperparameters were optimised in repeated nested cross-validation and area under the receiver-operating characteristic curve (AUC) was the performance evaluation criterion. We used the LIBLINEAR program with L2 regularisation to attenuate overfitting<sup>21</sup> whereby weights of non-predictive features are minimised, but not reduced to zero (thus more closely modelling the biological effects of functionally inter-related proteins). Hyperplane weighting was enabled (increasing the misclassification penalty in the minority class) which reduces risk of bias in unbalanced group sizes.<sup>22</sup> Random-label permutation analysis<sup>23-25</sup> with 1000 permutations was used to verify models against a null distribution and derive *p*-values for statistical significance. Prior to model training, missing clinical data were replaced using the mean (for continuous) or modal value (for categorical variables). Continuous clinical variables were converted to z-scores and winsorised within  $\pm 3z$ .

### 4.2 EU-GEI clinical features

A full list of the baseline clinical features included in Model 1a, Model 1b and Model 3 is provided in eTable 2.

### 4.3 Leave-site-out repeated nested cross-validation

The data were first split into folds in the 'outer loop' of cross-validation. To incorporate geographical generalisability, we split the data into groups by study site. Several of the smaller sites from the EU-GEI study were combined to ensure a large enough transition sample was present at each site. Thus, Amsterdam and The Hague were combined (Netherlands), Basel and Vienna were combined (Switzerland/ Austria),

Copenhagen and Paris were combined (Denmark/ France), and Barcelona and Sao Paulo were combined (Spain/ Brazil). This resulted in 6 final groups (as shown below):

| <b><u>Group</u></b>         | <b><u>CHR-NT, n (%)</u></b> | <b><u>CHR-T, n (%)</u></b> |
|-----------------------------|-----------------------------|----------------------------|
| <b>London</b>               | 34 (64%)                    | 19 (36%)                   |
| <b>Denmark/ France</b>      | 13 (54%)                    | 11 (46%)                   |
| <b>Netherlands</b>          | 13 (87%)                    | 2 (13%)                    |
| <b>Melbourne</b>            | 9 (64%)                     | 5 (36%)                    |
| <b>Switzerland/ Austria</b> | 6 (43%)                     | 8 (57%)                    |
| <b>Spain/ Brazil</b>        | 9 (69%)                     | 4 (31%)                    |

These groups were folds in the outer cross-validation loop. For each cycle of cross-validation, data from each of the 6 groups were held out and the rest of the data moved into the 'inner loop' for training.

Within the inner loop, we used 5 non-overlapping folds with iterative training-test cycles. Thus, training was applied to four-fifths of the data in the inner loop and then tested against the final one-fifth, with the 5 different inner loop folds as the test fold. Models were trained and tested within the inner loop using a range of regularisation parameter values (in 11 steps from 0.015625 to 16). The optimal models thus derived were tested against the held-out site in the outer loop. This process was then repeated, with each site in the outer loop as the test site, to determine the overall optimal model and final predictive accuracy. For a detailed description of repeated nested cross-validation, see the supplementary material of Koutsouleris et al<sup>26</sup> and the Neurominer manual (available from <https://www.pronia.eu/neurominer/>).

#### *4.4 Confidence intervals for area under the receiver-operating characteristic curve*

95% confidence intervals for the area under the receiver-operating characteristic curve (AUC) for each model were calculated according to the method of Hanley & McNeil.<sup>27</sup>

#### *4.5 ELISA results*

Concentrations for the unknown samples were interpolated using 4 parameter logistic curve fit in GraphPad Prism 8 software. Means for each protein were compared using the t-test with unequal variances in Stata version 15.

#### *4.6 Protein-protein interactions*

To synthesise evidence for direct protein-protein interactions, searches for each of the 35 significantly differentially expressed proteins between CHR-T and CHR-NT in the initial experiment were performed using

the BIOGRID curated database of protein-protein interactions (<https://thebiogrid.org/>). 34 of the 35 proteins were listed in the database (ADAMTS13 was not) and 11 unique interactions were identified (eTable 7). The same 35 proteins were entered into the STRING database (<https://string-db.org/>) to facilitate functional enrichment analysis (eTable 8) and generation of a functional protein association network (eFigure 2).

## 5. EU-GEI replication dataset

The replication dataset included 49 CHR-T participants (2 of whom were different from those in the original dataset used for Models 1a-d) and 86 CHR-NT participants (all of whom were different from those in the original dataset). Baseline characteristics of participants included in the replication dataset are compared to those not included in eTable 11. Included participants were more likely to be male, although this difference was no longer significant after false discovery rate (FDR) correction. Characteristics of the replication subsample are presented stratified by transition status in eTable 12. Regarding baseline characteristics, there was evidence of nominally significant differences between CHR-T and CHR-NT for ethnicity, tobacco use and mean total SANS composite, SANS global and BPRS scores, though not after FDR correction.

## 6. Supplementary analyses

### *6.1 Development of a model to predict transition outcome in EU-GEI based on ELISA results (Model S1)*

Concentrations from the 9 ELISAs performed (as described in Section 3 above) were z-transformed and winsorised within  $\pm 3z$ . The results were used as features in an L2-regularised SVM algorithm using leave-site-out repeated nested cross-validation. Hyperplane weighting was enabled and area under the receiver-operating characteristic curve (AUC) was the performance evaluation criterion.

The performance metrics for this model are presented in Table 2. The mean algorithm scores, predicted classes and receiver-operating characteristic (ROC) curve are shown in eFigure 9.

### *6.2 Development of a model to predict functional outcome at 24 months in EU-GEI based on clinical and proteomic data (Model S2)*

To investigate the performance of the available clinical and proteomic data for prediction of a transdiagnostic outcome, we developed a model based on the 69 clinical and 166 proteomic features used in Model 1a, but for prediction of functional outcome (Model S2). We used the General Assessment of Functioning (GAF)<sup>28,29</sup> disability subscale, recorded at the follow-up assessment closest to 2 years from baseline, as a measure of



general functioning. For use as a classification target variable (and in line with previous approaches<sup>30</sup>) the score was dichotomised into 'poor functioning' ( $\leq 60$  points, i.e. moderate or severe impairment) or 'good functioning' ( $> 60$  points, i.e. mild or no impairment).

An L2-regularised SVM algorithm was used to derive the model with AUC as the performance evaluation criterion. Hyperplane weighting was enabled. Compared to transition status, fewer participants had data available for functional outcome at 24 months ( $n=79$ ). Therefore, this model used repeated nested cross-validation with 5 random inner and outer folds, irrespective of study site.

The performance metrics for this model are presented in Table 2 and the 10% highest-weighted features are shown in eTable 16. The mean algorithm scores, predicted classes and ROC curve are shown in eFigure 10.

### *6.3 Investigation of site associations in EU-GEI*

Given the multisite nature of the EU-GEI study, we wished to investigate whether the clinical and proteomic data and predictions varied systematically by site.

First, we performed Kruskal-Wallis tests to determine whether the decision scores for Model 1b (clinical model) and Model 1c (proteomic model) differed according to the 6 site groupings used in the original models' leave-site-out cross validation schemes (i.e. London, Netherlands, Melbourne, Switzerland/Austria, Denmark/France and Spain/Brazil). The results are presented in eFigure 11 (for Model 1b, clinical data) and eFigure 12 (for Model 1c, proteomic data). There was evidence for differences in decision scores by site with respect to the clinical data (Model 1b) and post-hoc Dunn's tests<sup>31</sup> with Bonferroni correction suggested that the pertinent sites were London and Netherlands. There was little evidence for differences in decision scores by site with respect to the proteomic data (Model 1c).

On further investigation (eFigures 13–22), there were significant differences ( $p < 0.05$ ) between the 6 different site groups according to the Kruskal-Wallis test for 6 clinical variables: age, years in education, GAF symptoms subscale, GAF disability subscale, SANS total global score and BPRS total score. Post-hoc Dunn's tests with Bonferroni correction were performed for these 6 variables (eFigures 13, 14, 17, 18, 20, 21). The results indicated that site associations in the clinical data may have been driven primarily by differences in age between London vs. the other sites and Netherlands vs. the other sites (participants from London and Netherlands had slightly higher median age compared to the other sites), and possibly by differences in years

in education between Netherlands vs. the other sites. Participants from the London site also had higher median total BPRS score compared to participants from most of the other sites.

Second, we trained SVM models to predict the site provenance of EU-GEI cases based firstly on the clinical data (69 clinical features as per Model 1b) and secondly on the proteomic data (166 proteomic features as per Model 1c). In both cases, in keeping with the original models, we used the LIBLINEAR program with area under the receiver-operating curve (AUC) as the performance evaluation criterion. Hyperplane weighting was enabled. Models were trained using 5-fold pooled cross-validation with 5 inner and 5 outer folds. We used a 'one-vs-all' scheme for multiclass prediction of the 6 EU-GEI site groupings that were used in the original models' leave-site-out cross-validation schemes, as shown below:

1. London vs. REST
2. Netherlands vs. REST
3. Melbourne vs REST
4. Switzerland/Austria vs. REST
5. Denmark/France vs REST
6. Spain/Brazil vs REST

The performance metrics and ROC curves for the multiclass site prediction models based on clinical data are shown in eTable 17 and eFigure 23, and for the proteomic data in eTable 18 and eFigure 24.

The results of this analysis indicated little evidence of systematic site associations for the proteomic data. The 95% confidence intervals (95% CI) for the AUC for prediction of each site included 0.5 (the value of no discrimination) with the exception of London vs. REST, although here the lower bound was close to 0.5 (AUC 0.61, 95% CI: 0.51 – 0.71).

In keeping with the Kruskal-Wallis analyses above, there was greater evidence of site associations in relation to the clinical data for London vs. REST (AUC 0.76, 95% CI 0.67 – 0.85) and Netherlands vs. REST (AUC 0.76, 95% CI 0.61 – 0.91), likely driven by the differences in age, education and total BPRS score for these sites.

#### *6.4 Multivariate correction*

Since our models were predictive (rather than causal), the primary analyses did not include correction for possible covariates. However, to investigate this, we developed corrected versions of the SVM models using multivariate correction via principal components analysis (PCA). This was performed using the ‘Extract variance components from data’ pre-processing function in Neurominer v1.0

(<https://www.pronia.eu/neurominer/>) whereby a PCA was performed on a source matrix of covariates.

Correlations (Spearman’s correlation coefficient) between the eigenvariates from the PCA reduction were determined and those greater than 0.2 (indicating weak correlation) were identified. The target matrix was projected to the source matrix PCA space (90% retained variance), then back-reconstructed to the original input space without the identified PCA components, thus removing the variance associated with those components.

The primary covariates of interest were age, sex, BMI and years in education (as a proxy socio-economic measure) in Study 1 and sex, BMI and maternal social class in Study 2. However, we additionally corrected for tobacco use and ethnicity in the replication dataset for Study 1, due to evidence of baseline differences for these variables between CHR-T and CHR-NT in this dataset (see eTable 12).

For each corrected model, the covariates for which correction was performed are listed below:

| <b><u>Model</u></b>                                       | <b><u>Covariates in PCA</u></b>                           |
|-----------------------------------------------------------|-----------------------------------------------------------|
| <b>Model 1a (corrected):</b> clinical and proteomic       | Age, sex, BMI, years in education                         |
| <b>Model 1b (corrected):</b> clinical                     | Age, sex, BMI, years in education                         |
| <b>Model 1c (corrected):</b> proteomic                    | Age, sex, BMI, years in education                         |
| <b>Model 2a (corrected):</b> proteomic, non-London        | Age, sex, BMI, years in education                         |
| <b>Model 2b (corrected):</b> top 10 proteomic, non-London | Age, sex, BMI, years in education                         |
| <b>Model 3 (corrected):</b> replication                   | Age, sex, BMI, years in education, tobacco use, ethnicity |
| <b>Model 4 (corrected):</b> ALSPAC PEs                    | Sex, BMI, maternal social class                           |
| <b>Model S1 (corrected):</b> ELISA                        | Age, sex, BMI, years in education                         |
| <b>Model S2 (corrected):</b> functional outcome           | Age, sex, BMI, years in education                         |

Performance metrics of uncorrected and corrected models are presented in eTable 19. There were generally slight reductions in the AUCs of the corrected models when compared to their uncorrected counterparts (median change in AUC 0.04, range 0.01 – 0.10), although in all cases the 95% confidence intervals for the AUC of the uncorrected and corrected models overlapped.

## 7. Information on reporting of ethnicity

In the current study, data was collected for ethnicity on the basis of potential relationships to the outcomes of interest.<sup>32,33</sup> Options for ethnicity were investigator-defined according to the Medical Research Council Socio-Demographic Schedule (amended)<sup>34</sup> in EU-GEI and a self-reported questionnaire in ALSPAC.

## eReferences

1. Levin Y, Wang L, Schwarz E, Koethe D, Leweke FM, Bahn S. Global proteomic profiling reveals altered proteomic signature in schizophrenia serum. *Mol Psychiatry*. 2010;15(11):1088-1100.
2. Bradford MM. A rapid and sensitive method for the quantitation of microgram quantities of protein utilizing the principle of protein-dye binding. *Anal Biochem*. 1976;72:248-254.
3. English JA, Fan Y, Focking M, et al. Reduced protein synthesis in schizophrenia patient-derived olfactory cells. *Translational psychiatry*. 2015;5:e663.
4. English JA, Lopez LM, O'Gorman A, et al. Blood-Based Protein Changes in Childhood Are Associated With Increased Risk for Later Psychotic Disorder: Evidence From a Nested Case-Control Study of the ALSPAC Longitudinal Birth Cohort. *Schizophr Bull*. 2018;44(2):297-306.
5. Föcking M, Sabherwal S, Cates HM, et al. Complement pathway changes at age 12 are associated with psychotic experiences at age 18 in a longitudinal population-based study: evidence for a role of stress. *Molecular Psychiatry*. 2019.
6. Sabherwal S, English JA, Focking M, Cagney G, Cotter DR. Blood biomarker discovery in drug-free schizophrenia: the contribution of proteomics and multiplex immunoassays. *Expert review of proteomics*. 2016;13(12):1141-1155.
7. Sabherwal S, Focking M, English JA, et al. ApoE elevation is associated with the persistence of psychotic experiences from age 12 to age 18: Evidence from the ALSPAC birth cohort. *Schizophr Res*. 2019.
8. Ghale-Noie ZN, Hassani M, Kachooei AR, Kerachian MA. High Serum Alpha-2-Macroglobulin Level in Patients with Osteonecrosis of the Femoral Head. *The archives of bone and joint surgery*. 2018;6(3):219-224.
9. Bjelosevic S, Pascovici D, Ping H, et al. Quantitative Age-specific Variability of Plasma Proteins in Healthy Neonates, Children and Adults. *Molecular & cellular proteomics : MCP*. 2017;16(5):924-935.
10. Robinson MD, Mishra I, Deodhar S, et al. Water T2 as an early, global and practical biomarker for metabolic syndrome: an observational cross-sectional study. *Journal of translational medicine*. 2017;15(1):258.
11. Sunderic M, Mihailovic N, Nedic O. Protein molecular forms of insulin-like growth factor binding protein-2 change with aging. *Experimental gerontology*. 2014;58:154-158.
12. Banville N, Burgess JK, Jaffar J, et al. A quantitative proteomic approach to identify significantly altered protein networks in the serum of patients with lymphangioliomyomatosis (LAM). *PloS one*. 2014;9(8):e105365.
13. Zeng J, Deng P, Li J, Feng W, Chen J, Zeng Y. Increased serum protein levels by Yuanshi Shengmai Chenggu Tablet in treatment of avascular osteonecrosis of the femoral head. *Molecular medicine reports*. 2018;17(2):2121-2126.
14. Zhou ZQ, Tong DN, Guan J, et al. Follicular helper T cell exhaustion induced by PD-L1 expression in hepatocellular carcinoma results in impaired cytokine expression and B cell help, and is associated with advanced tumor stages. *American journal of translational research*. 2016;8(7):2926-2936.
15. Guy JH, Pyne DB, Deakin GB, Miller CM, Edwards AM. Acclimation Training Improves Endurance Cycling Performance in the Heat without Inducing Endotoxemia. *Frontiers in physiology*. 2016;7:318.
16. Ferrin G, Rodriguez-Peralvarez M, Aguilar-Melero P, et al. Plasma protein biomarkers of hepatocellular carcinoma in HCV-infected alcoholic patients with cirrhosis. *PloS one*. 2015;10(3):e0118527.
17. Liang Y, Xie SB, Wu CH, et al. Coagulation cascade and complement system in systemic lupus erythematosus. *Oncotarget*. 2018;9(19):14862-14881.
18. Ting KR, Henry M, Meiller J, et al. Novel panel of protein biomarkers to predict response to bortezomib-containing induction regimens in multiple myeloma patients. *BBA clinical*. 2017;8:28-34.

19. McGuire JL, Gill AJ, Douglas SD, Kolson DL. The complement system, neuronal injury, and cognitive function in horizontally-acquired HIV-infected youth. *Journal of neurovirology*. 2016;22(6):823-830.
20. Lui H, Zhang J, Makinson SR, et al. Progranulin Deficiency Promotes Circuit-Specific Synaptic Pruning by Microglia via Complement Activation. *Cell*. 2016;165(4):921-935.
21. Fan R-E, Chang K-W, Hsieh C-J, Wang X-R, Lin C-J. LIBLINEAR: A Library for Large Linear Classification. *J Mach Learn Res*. 2008;9:1871-1874.
22. Krawczyk B. Learning from imbalanced data: open challenges and future directions. *Progress in Artificial Intelligence*. 2016;5(4):221-232.
23. Gaonkar B, Davatzikos C. Analytic estimation of statistical significance maps for support vector machine based multi-variate image analysis and classification. *Neuroimage*. 2013;78:270-283.
24. Koutsouleris N, Kahn RS, Chekroud AM, et al. Multisite prediction of 4-week and 52-week treatment outcomes in patients with first-episode psychosis: a machine learning approach. *The Lancet Psychiatry*. 2016;3(10):935-946.
25. Golland P, Fischl B. Permutation Tests for Classification: Towards Statistical Significance in Image-Based Studies. Paper presented at: Information Processing in Medical Imaging; 2003//, 2003; Berlin, Heidelberg.
26. Koutsouleris N, Kahn RS, Chekroud AM, et al. Multisite prediction of 4-week and 52-week treatment outcomes in patients with first-episode psychosis: a machine learning approach. *Lancet Psychiatry*. 2016;3(10):935-946.
27. Hanley JA, McNeil BJ. The meaning and use of the area under a receiver operating characteristic (ROC) curve. *Radiology*. 1982;143(1):29-36.
28. Aas IH. Global Assessment of Functioning (GAF): properties and frontier of current knowledge. *Ann Gen Psychiatry*. 2010;9:20.
29. Goldman HH, Skodol AE, Lave TR. Revising axis V for DSM-IV: a review of measures of social functioning. *Am J Psychiatry*. 1992;149(9):1148-1156.
30. Koutsouleris N, Kambaitz-Illankovic L, Ruhrmann S, et al. Prediction Models of Functional Outcomes for Individuals in the Clinical High-Risk State for Psychosis or With Recent-Onset Depression: A Multimodal, Multisite Machine Learning Analysis. *JAMA psychiatry*. 2018;75(11):1156-1172.
31. Dinno A. Nonparametric pairwise multiple comparisons in independent groups using Dunn's test. *Stata Journal*. 2015;15(1):292-300.
32. Morgan C, Charalambides M, Hutchinson G, Murray RM. Migration, ethnicity, and psychosis: toward a sociodevelopmental model. *Schizophr Bull*. 2010;36(4):655-664.
33. Kelleher I, Cannon M. Psychotic-like experiences in the general population: characterizing a high-risk group for psychosis. *Psychological medicine*. 2011;41(1):1-6.
34. Mallett R. Sociodemographic Schedule. Section of Social Psychiatry, Institute of Psychiatry; London: 1997

**eTable 1: Summary of support vector machine models**

| <b>Model</b>    | <b>Aim</b>                                                                              | <b>Source cohort</b> | <b>Target outcome to be predicted</b> | <b>Data modalities</b>                               | <b>Repeated nested cross-validation method</b> | <b>Development data (n in each group)</b>                         | <b>Test data (n in each group)</b>                    |
|-----------------|-----------------------------------------------------------------------------------------|----------------------|---------------------------------------|------------------------------------------------------|------------------------------------------------|-------------------------------------------------------------------|-------------------------------------------------------|
| <b>Model 1a</b> | Predict transition in CHR sample using baseline clinical and proteomic data             | EU-GEI               | Transition status                     | 69 clinical and 166 proteomic features               | Leave-site-out                                 | Initial experiment, all sites (49 CHR-T, 84 CHR-NT)               | N/A                                                   |
| <b>Model 1b</b> | Predict transition in CHR sample using baseline clinical data                           | EU-GEI               | Transition status                     | 69 clinical features                                 | Leave-site-out                                 | Initial experiment, all sites (49 CHR-T, 84 CHR-NT)               | N/A                                                   |
| <b>Model 1c</b> | Predict transition in CHR sample using baseline proteomic data                          | EU-GEI               | Transition status                     | 166 proteomic features                               | Leave-site-out                                 | Initial experiment, all sites (49 CHR-T, 84 CHR-NT)               | N/A                                                   |
| <b>Model 2a</b> | Derivation of 10 highest-weighted proteomic features                                    | EU-GEI               | Transition status                     | 166 proteomic features                               | Leave-site-out                                 | Initial experiment, all sites except London (30 CHR-T, 50 CHR-NT) | N/A                                                   |
| <b>Model 2b</b> | Predict transition in CHR sample using 10 proteomic features, and test in held-out data | EU-GEI               | Transition status                     | 10 highest-weighted proteomic features from Model 2a | Leave-site-out                                 | Initial experiment, all sites except London (30 CHR-T, 50 CHR-NT) | Initial experiment, London site (19 CHR-T, 34 CHR-NT) |
| <b>Model 3</b>  | Replicate findings from Model 1a                                                        | EU-GEI               | Transition status                     | 69 clinical and 119 proteomic features               | Leave-site-out                                 | Replication experiment, all sites (49 CHR-T, 86 CHR-NT)           | N/A                                                   |
| <b>Model 4</b>  | Predict age 18 psychotic experiences in general population sample using proteomic       | ALSPAC               | Psychotic experiences (PEs)           | 265 proteomic features                               | Pooled (5 random inner and outer folds)        | ALSPAC subsample (55 PE, 66 no PE)                                | N/A                                                   |

|                             | data at age 12                                                                      |                      |                                       |                                        |                                                |                                                                 |                                    |
|-----------------------------|-------------------------------------------------------------------------------------|----------------------|---------------------------------------|----------------------------------------|------------------------------------------------|-----------------------------------------------------------------|------------------------------------|
| <b>Supplementary models</b> |                                                                                     |                      |                                       |                                        |                                                |                                                                 |                                    |
| <b>Model</b>                | <b>Aim</b>                                                                          | <b>Source cohort</b> | <b>Target outcome to be predicted</b> | <b>Data modalities</b>                 | <b>Repeated nested cross-validation method</b> | <b>Development data (n in each group)</b>                       | <b>Test data (n in each group)</b> |
| <b>Model S1</b>             | Predict transition in CHR sample using baseline ELISA results                       | EU-GEI               | Transition status                     | 9 ELISA features                       | Leave-site-out                                 | Initial experiment, all sites (44 CHR-T, 82 CHR-NT)             | N/A                                |
| <b>Model S2</b>             | Predict functional outcome in CHR sample using baseline clinical and proteomic data | EU-GEI               | Functional outcome                    | 69 clinical and 166 proteomic features | Pooled (5 random inner and outer folds)        | Initial experiment, all sites (47 GAF $\leq$ 60, 32 GAF $>$ 60) | N/A                                |

CHR: clinical high risk; ELISA: enzyme-linked immunosorbent assay; EU-GEI: European Network of National Schizophrenia Networks Studying Gene-Environment Interactions; ALSPAC: Avon Longitudinal Study of Parents and Children

**eTable 2: List of 69 baseline EU-GEI clinical features included in Model 1a, Model 1b and Model 3**

|                                                    |
|----------------------------------------------------|
| Age                                                |
| Sex                                                |
| Body mass index                                    |
| Years in education                                 |
| GAF symptoms                                       |
| GAF disability                                     |
| SANS: unchanging facial expression                 |
| SANS: decreased spontaneous movements              |
| SANS: paucity of expressive gestures               |
| SANS: poor eye contact                             |
| SANS: affective non-responsivity                   |
| SANS: inappropriate affect                         |
| SANS: lack of vocal inflections                    |
| SANS: global rating of affective flattening        |
| SANS: poverty of speech                            |
| SANS: poverty of speech content                    |
| SANS: blocking                                     |
| SANS: increased latency of response                |
| SANS: global rating of alogia                      |
| SANS: grooming and hygiene                         |
| SANS: impersistence at work or school              |
| SANS: physical anergia                             |
| SANS: global rating for avolition - apathy         |
| SANS: recreational interests and activities        |
| SANS: sexual activity                              |
| SANS: ability to feel intimacy and closeness       |
| SANS: relationship with friends and peers          |
| SANS: global rating of anhedonia - asociality      |
| SANS: social inattentiveness                       |
| SANS: inattentiveness during mental status testing |
| SANS: global rating of attention                   |
| Total SANS composite score                         |
| Total SANS global score                            |
| BPRS: somatic concern                              |
| BPRS: anxiety                                      |
| BPRS: depression                                   |
| BPRS: suicidality                                  |
| BPRS: guilt                                        |
| BPRS: hostility                                    |



|                                   |
|-----------------------------------|
| BPRS: elevated mood               |
| BPRS: grandiosity                 |
| BPRS: suspiciousness              |
| BPRS: hallucinations              |
| BPRS: unusual thought content     |
| BPRS: bizarre behaviour           |
| BPRS: self-neglect                |
| BPRS: disorientation              |
| BPRS: conceptual disorganisation  |
| BPRS: blunted affect              |
| BPRS: emotional withdrawal        |
| BPRS: motor retardation           |
| BPRS: tension                     |
| BPRS: uncooperativeness           |
| BPRS: excitement                  |
| BPRS: distractibility             |
| BPRS: motor hyperactivity         |
| BPRS: mannersims and posturing    |
| Total BPRS score                  |
| MADRS: apparent sadness           |
| MADRS: reported sadness           |
| MADRS: inner tension              |
| MADRS: reduced sleep              |
| MADRS: reduced appetite           |
| MADRS: concentration difficulties |
| MADRS: lassitude                  |
| MADRS: inability to feel          |
| MADRS: pessimistic thoughts       |
| MADRS: suicidal thoughts          |
| Total MADRS score                 |

GAF: General Assessment of Functioning; SANS: Scale for the Assessment of Negative Symptoms; BPRS: Brief Psychiatric Rating Scale; MADRS: Montgomery Asberg Depression Rating Scale; EU-GEI: European Network of National Schizophrenia Networks Studying Gene-Environment Interactions

**eTable 3: Comparison of baseline characteristics for CHR participants who attended at least one follow-up interview vs. CHR participants who did not in EU-GEI**

|                                               | Missing data, n (%) | Attended at least one follow-up interview, N=171                                                   | Did not attend at least one follow-up interview, N=173                                             | t/ $\chi^2$ | <i>p</i> | Corrected <i>p</i> (FDR 5%) |
|-----------------------------------------------|---------------------|----------------------------------------------------------------------------------------------------|----------------------------------------------------------------------------------------------------|-------------|----------|-----------------------------|
| Baseline age in years, mean (SD)              | 0                   | 23.0 (5.1)                                                                                         | 21.8 (4.7)                                                                                         | 2.240       | 0.026    | 0.104                       |
| Sex, n (%)                                    | 0                   | 92 male (53.8%)<br>79 female (46.2%)                                                               | 93 male (53.8%)<br>80 female (46.2%)                                                               | 0.000       | 0.993    | 0.993                       |
| Baseline BMI in kg/m <sup>2</sup> , mean (SD) | 53 (15.4%)          | 23.9 (5.2)                                                                                         | 24.0 (5.1)                                                                                         | -0.274      | 0.784    | 0.941                       |
| Baseline years in education, mean (SD)        | 41 (11.9%)          | 15.0 (2.8)                                                                                         | 13.7 (3.2)                                                                                         | 3.689       | <0.001   | <0.008                      |
| Ethnicity, n (%)                              | 3 (0.9%)            | 124 white (72.1%)<br>18 black (10.5%)<br>30 other (17.4%)                                          | 122 white (72.2%)<br>15 black (8.9%)<br>32 other (18.9%)                                           | 0.327       | 0.849    | 0.941                       |
| Ever used cannabis, n (%)                     | 13 (3.8%)           | 129 yes (77.2%)<br>38 no (22.8%)                                                                   | 112 yes (68.3%)<br>52 no (31.7%)                                                                   | 3.350       | 0.067    | 0.214                       |
| Baseline cannabis use, n (%)                  | 98 (28.5%)          | 46 yes (35.4%)<br>84 no (64.6%)                                                                    | 40 yes (34.5%)<br>76 no (65.5%)                                                                    | 0.022       | 0.882    | 0.941                       |
| Baseline tobacco use, n (%)                   | 41 (11.9%)          | 89 yes (55.6%)<br>71 no (44.4%)                                                                    | 71 yes (49.7%)<br>72 no (50.3%)                                                                    | 1.082       | 0.298    | 0.681                       |
| Baseline alcohol use, n (%)                   | 15 (4.4%)           | 117 yes (69.6%)<br>51 no (30.4%)                                                                   | 116 yes (72.0%)<br>45 no (28.0%)                                                                   | 0.230       | 0.631    | 0.941                       |
| Baseline medication use, n (%)                | 89 (25.9%)          | 69 yes (50.4%)<br>Antipsychotic 9<br>Antidepressant 54<br>Hypnotic 15<br>Other 21<br>68 no (49.6%) | 57 yes (48.3%)<br>Antipsychotic 22<br>Antidepressant 37<br>Hypnotic 8<br>Other 15<br>61 no (51.7%) | 0.108       | 0.743    | 0.941                       |
| Baseline GAF symptoms score, mean (SD)        | 27 (7.8%)           | 55.3 (9.9)                                                                                         | 54.9 (10.3)                                                                                        | 0.280       | 0.779    | 0.941                       |
| Baseline GAF disability score, mean (SD)      | 12 (3.5%)           | 56.5 (12.0)                                                                                        | 54.3 (12.5)                                                                                        | 1.613       | 0.108    | 0.288                       |

|                                                       |            |             |             |        |       |       |
|-------------------------------------------------------|------------|-------------|-------------|--------|-------|-------|
| <b>Baseline SANS total composite score, mean (SD)</b> | 48 (14.0%) | 14.0 (10.5) | 17.5 (12.7) | -2.600 | 0.010 | 0.053 |
| <b>Baseline SANS total global score, mean (SD)</b>    | 32 (9.3%)  | 4.8 (3.4)   | 6.2 (3.7)   | -3.357 | 0.001 | 0.008 |
| <b>Baseline BPRS total score, mean (SD)</b>           | 28 (8.1%)  | 43.1 (10.7) | 44.0 (9.7)  | -0.794 | 0.428 | 0.856 |
| <b>Baseline MADRS total score, mean (SD)</b>          | 19 (5.5%)  | 18.8 (9.1)  | 19.0 (9.2)  | -0.261 | 0.794 | 0.941 |

Tobacco use was defined as daily use for at least 1 month over the previous 12 months.

Alcohol use was defined as at least 12 or more alcoholic beverages over the previous 12 months.

Missing data excluded in hypothesis tests.

EU-GEI: European Network of National Schizophrenia Networks Studying Gene-Environment Interactions; CHR-T: clinical high risk, transitioned to psychosis; CHR-NT: clinical high risk, did not transition to psychosis; FDR: false discovery rate; BMI: body mass index; GAF: General Assessment of Functioning; SANS: Scale for the Assessment of Negative Symptoms; BPRS: Brief Psychiatric Rating Scale; MADRS: Montgomery Asberg Depression Rating Scale

**eTable 4: Comparison of characteristics for participants included in initial experiment (N=133) from total EU-GEI clinical high-risk cohort (N=344)**

|                                                    | Missing data, n (%) | Included, N = 133<br>(49 CHR-T,<br>84 CHR-NT)                                                      | Not included, N = 211<br>(16 CHR-T,<br>195 CHR-NT)                                                  | t/ $\chi^2$ | p     | Corrected p<br>(FDR 5%) |
|----------------------------------------------------|---------------------|----------------------------------------------------------------------------------------------------|-----------------------------------------------------------------------------------------------------|-------------|-------|-------------------------|
| <b>Baseline age in years, mean (SD)</b>            | 0                   | 22.6 (4.5)                                                                                         | 22.3 (5.2)                                                                                          | 0.686       | 0.493 | 0.681                   |
| <b>Gender, n (%)</b>                               | 0                   | 68 male (51.1%)<br>65 female (49.9%)                                                               | 117 male (55.5%)<br>94 female (45.5%)                                                               | 0.613       | 0.434 | 0.681                   |
| <b>Baseline BMI in kg/m<sup>2</sup>, mean (SD)</b> | 50 (14.5%)          | 24.4 (5.6)                                                                                         | 23.7 (4.9)                                                                                          | 1.190       | 0.235 | 0.439                   |
| <b>Baseline years in education, mean (SD)</b>      | 38 (11.0%)          | 14.3 (3.1)                                                                                         | 14.4 (3.0)                                                                                          | -0.318      | 0.751 | 0.793                   |
| <b>Ethnicity, n (%)</b>                            | 0                   | 91 white (68.4%)<br>15 black (11.3%)<br>27 other (20.3%)                                           | 156 white (73.9%)<br>19 black (9.0%)<br>36 other (17.1%)                                            | 1.239       | 0.538 | 0.681                   |
| <b>Ever used cannabis, n (%)</b>                   | 10 (2.9%)           | 101 yes (75.9%)<br>29 no (21.8%)<br>3 not known (2.3%)                                             | 143 yes (67.8%)<br>61 no (28.9%)<br>7 not known (3.3%)                                              | 2.326       | 0.127 | 0.302                   |
| <b>Baseline cannabis use, n (%)</b>                | 95 (27.6%)          | 41 yes (30.8%)<br>63 no (47.4%)<br>29 not known (21.8%)                                            | 47 yes (22.3%)<br>98 no (46.4%)<br>66 not known (31.3%)                                             | 1.302       | 0.254 | 0.439                   |
| <b>Baseline tobacco use, n (%)</b>                 | 38 (11.0%)          | 64 yes (48.1%)<br>55 no (41.4%)<br>14 not known (10.5%)                                            | 97 yes (46.0%)<br>90 no (42.7%)<br>24 not known (11.4%)                                             | 0.106       | 0.744 | 0.793                   |
| <b>Baseline alcohol use, n (%)</b>                 | 12 (3.5%)           | 93 yes (69.9%)<br>37 no (27.8%)<br>3 not known (2.3%)                                              | 141 yes (66.8%)<br>61 no (28.9%)<br>9 not known (4.3%)                                              | 0.115       | 0.735 | 0.793                   |
| <b>Baseline medication use, n (%)</b>              | 87 (25.3%)          | 51 yes (38.3%)<br>Antidepressant 38<br>Antipsychotic 15<br>Hypnotic 9<br>Other 16<br>51 no (38.3%) | 77 yes (36.5%)<br>Antidepressant 53<br>Antipsychotic 16<br>Hypnotic 14<br>Other 20<br>78 no (37.0%) | 0.003       | 0.960 | 0.960                   |

|                                                                      |             |                                                            |                                                            |        |        |        |
|----------------------------------------------------------------------|-------------|------------------------------------------------------------|------------------------------------------------------------|--------|--------|--------|
|                                                                      |             | 31 not known (23.3%)                                       | 56 not known (26.5%)                                       |        |        |        |
| <b>Baseline GAF symptoms score, mean (SD)</b>                        | 27 (7.8%)   | 54.7 (10.2)                                                | 55.4 (10.0)                                                | -0.634 | 0.526  | 0.681  |
| <b>Baseline GAF disability score, mean (SD)</b>                      | 12 (3.5%)   | 53.9 (11.7)                                                | 56.4 (12.5)                                                | -1.827 | 0.069  | 0.187  |
| <b>Baseline SANS total composite score, mean (SD)</b>                | 45 (13.1%)  | 18.0 (12.7)                                                | 14.2 (10.7)                                                | 2.782  | 0.006  | 0.029  |
| <b>Baseline SANS total global score, mean (SD)</b>                   | 29 (8.4%)   | 6.1 (3.9)                                                  | 5.0 (3.4)                                                  | 2.528  | 0.012  | 0.046  |
| <b>Baseline BPRS total score, mean (SD)</b>                          | 25 (7.3%)   | 46.0 (10.9)                                                | 42.2 (9.6)                                                 | 3.174  | 0.002  | 0.013  |
| <b>Baseline MADRS total score, mean (SD)</b>                         | 16 (4.7%)   | 19.6 (9.7)                                                 | 18.4 (8.8)                                                 | 1.155  | 0.249  | 0.439  |
| <b>2 year GAF symptoms score, mean (SD)</b>                          | 142 (41.3%) | 54.6 (15.0)                                                | 63.0 (11.6)                                                | -4.083 | <0.001 | <0.010 |
| <b>2 year GAF disability score, mean (SD)</b>                        | 124 (36.0%) | 56.9 (15.0)                                                | 63.6 (13.8)                                                | -3.333 | 0.001  | 0.010  |
| <b>2 year GAF disability score, dichotomous outcome <sup>a</sup></b> | 124 (36.0%) | 32 good (24.1%)<br>47 poor (35.3%)<br>54 not known (40.6%) | 80 good (37.9%)<br>61 poor (28.9%)<br>70 not known (33.2%) | 5.337  | 0.021  | 0.067  |

<sup>a</sup> Poor functioning: GAF disability score ≤60; good functioning: GAF disability score >60

Tobacco use was defined as daily use for at least 1 month over the previous 12 months. Alcohol use was defined as at least 12 or more alcoholic beverages over the previous 12 months. Missing data excluded in hypothesis tests.

EU-GEI: European Network of National Schizophrenia Networks Studying Gene-Environment Interactions; CHR-T: clinical high risk, transitioned to psychosis; CHR-NT: clinical high risk, did not transition to psychosis; FDR: false discovery rate; BMI: body mass index; GAF: General Assessment of Functioning; SANS: Scale for the Assessment of Negative Symptoms; BPRS: Brief Psychiatric Rating Scale; MADRS: Montgomery Asberg Depression Rating Scale

**eTable 5: Results of ANCOVA (adjusted for age, sex, BMI and years in education) and fold changes (CHR-T vs. CHR-NT) for proteins identified in EU-GEI baseline plasma samples in the initial experiment**

| Uniprot No. | Protein name                                                      | F     | p        | Corrected p (5% FDR) | Direction of effect (T vs. NT) | Ratio of means (T vs. NT) |
|-------------|-------------------------------------------------------------------|-------|----------|----------------------|--------------------------------|---------------------------|
| P01023      | Alpha-2-macroglobulin                                             | 146   | 7.55E-23 | 1.25E-20             | ↓                              | 0.33                      |
| P01871      | Immunoglobulin heavy constant mu                                  | 72.16 | 4.53E-14 | 3.76E-12             | ↓                              | 0.41                      |
| P07357      | Complement component C8 alpha chain                               | 44.25 | 7.76E-10 | 4.29E-08             | ↑                              | 1.48                      |
| P02774      | Vitamin D-binding protein                                         | 40.97 | 2.72E-09 | 1.13E-07             | ↑                              | 1.43                      |
| P02747      | Complement C1q subcomponent subunit C                             | 36.52 | 1.56E-08 | 5.18E-07             | ↑                              | 1.53                      |
| P00747      | Plasminogen                                                       | 31.39 | 1.25E-07 | 3.46E-06             | ↑                              | 1.29                      |
| P10909      | Clusterin                                                         | 29.74 | 2.48E-07 | 5.88E-06             | ↑                              | 1.29                      |
| P23142      | Fibulin-1                                                         | 28.56 | 4.06E-07 | 8.42E-06             | ↑                              | 1.52                      |
| P55058      | Phospholipid transfer protein                                     | 19.09 | 2.57E-05 | 0.0005               | ↓                              | 0.67                      |
| P00736      | Complement C1r subcomponent                                       | 18.07 | 4.09E-05 | 0.0007               | ↑                              | 1.27                      |
| O75882      | Attractin                                                         | 16.85 | 0.0001   | 0.0011               | ↑                              | 1.30                      |
| P03951      | Coagulation factor XI                                             | 17.61 | 0.0001   | 0.0011               | ↑                              | 1.36                      |
| P05156      | Complement factor I                                               | 16.72 | 0.0001   | 0.0011               | ↑                              | 1.23                      |
| P08603      | Complement factor H                                               | 16.18 | 0.0001   | 0.0011               | ↑                              | 1.16                      |
| P43320      | Beta-crystallin B2                                                | 16.39 | 0.0001   | 0.0011               | ↑                              | 1.80                      |
| P04003      | C4b-binding protein alpha chain                                   | 14.71 | 0.0002   | 0.0020               | ↓                              | 0.76                      |
| P19827      | Inter-alpha-trypsin inhibitor heavy chain H1                      | 15.05 | 0.0002   | 0.0020               | ↑                              | 1.19                      |
| O75636      | Ficolin-3                                                         | 14.09 | 0.0003   | 0.0028               | ↓                              | 0.70                      |
| P01860      | Immunoglobulin heavy constant gamma 3                             | 13.19 | 0.0004   | 0.0033               | ↓                              | 0.70                      |
| P15144      | Aminopeptidase N                                                  | 13.38 | 0.0004   | 0.0033               | ↓                              | 0.72                      |
| P02489      | Alpha-crystallin A chain                                          | 12.08 | 0.0007   | 0.0055               | ↑                              | 1.63                      |
| P06396      | Gelsolin                                                          | 11.83 | 0.0008   | 0.0058               | ↑                              | 1.17                      |
| Q14520      | Hyaluronan-binding protein 2                                      | 11.87 | 0.0008   | 0.0058               | ↑                              | 1.21                      |
| P05155      | Plasma protease C1 inhibitor                                      | 11.01 | 0.0012   | 0.0083               | ↓                              | 0.85                      |
| P02766      | Transthyretin                                                     | 10.79 | 0.0013   | 0.0086               | ↓                              | 0.60                      |
| P02749      | Beta-2-glycoprotein 1                                             | 9.93  | 0.0020   | 0.0123               | ↑                              | 1.27                      |
| P04217      | Alpha-1B-glycoprotein                                             | 9.97  | 0.0020   | 0.0123               | ↓                              | 0.83                      |
| P22891      | Vitamin K-dependent protein Z                                     | 9.86  | 0.0021   | 0.0125               | ↓                              | 0.68                      |
| P00751      | Complement factor B                                               | 9.41  | 0.0026   | 0.0149               | ↑                              | 1.17                      |
| P05546      | Heparin cofactor 2                                                | 8.91  | 0.0034   | 0.0188               | ↓                              | 0.84                      |
| P06276      | Cholinesterase                                                    | 8.71  | 0.0038   | 0.0203               | ↑                              | 1.18                      |
| P51884      | Lumican                                                           | 8.4   | 0.0044   | 0.0228               | ↑                              | 1.25                      |
| P02649      | Apolipoprotein E                                                  | 8.25  | 0.0048   | 0.0241               | ↑                              | 1.28                      |
| Q76LX8      | A disintegrin and metalloproteinase with thrombospondin motifs 13 | 7.56  | 0.0068   | 0.0332               | ↓                              | 0.84                      |

|        |                                              |      |        |        |   |      |
|--------|----------------------------------------------|------|--------|--------|---|------|
| Q06033 | Inter-alpha-trypsin inhibitor heavy chain H3 | 7.15 | 0.0085 | 0.0403 | ↓ | 0.74 |
| P02656 | Apolipoprotein C-III                         | 6.59 | 0.0114 | 0.0526 | ↑ | 1.37 |
| P02751 | Fibronectin                                  | 6.43 | 0.0124 | 0.0542 | ↑ | 1.30 |
| P05543 | Thyroxine-binding globulin                   | 6.43 | 0.0124 | 0.0542 | ↑ | 1.18 |
| P00450 | Ceruloplasmin                                | 6.32 | 0.0132 | 0.0562 | ↑ | 1.14 |
| Q04756 | Hepatocyte growth factor activator           | 5.69 | 0.0185 | 0.0768 | ↑ | 1.14 |
| P05090 | Apolipoprotein D                             | 5.61 | 0.0193 | 0.0781 | ↑ | 1.17 |
| Q08380 | Galectin-3-binding protein                   | 5.38 | 0.0219 | 0.0866 | ↓ | 0.77 |
| P11226 | Mannose-binding protein C                    | 5.18 | 0.0246 | 0.0924 | ↑ | 1.36 |
| P10643 | Complement component C7                      | 5.17 | 0.0247 | 0.0924 | ↑ | 1.17 |
| P07225 | Vitamin K-dependent protein S                | 5.12 | 0.0254 | 0.0924 | ↓ | 0.87 |
| Q9BXR6 | Complement factor H-related protein 5        | 5.1  | 0.0256 | 0.0924 | ↑ | 1.30 |
| P49747 | Cartilage oligomeric matrix protein          | 4.94 | 0.0280 | 0.0989 | ↑ | 1.16 |
| P02675 | Fibrinogen beta chain                        | 4.79 | 0.0305 | 0.1033 | ↑ | 1.15 |
| P02671 | Fibrinogen alpha chain                       | 4.77 | 0.0307 | 0.1033 | ↑ | 1.12 |
| P04114 | Apolipoprotein B-100                         | 4.75 | 0.0311 | 0.1033 | ↓ | 0.89 |
| P01042 | Kininogen-1                                  | 4.69 | 0.0322 | 0.1048 | ↑ | 1.09 |
| P43652 | Afamin                                       | 4.49 | 0.0361 | 0.1152 | ↑ | 1.12 |
| P05160 | Coagulation factor XIII B chain              | 4.26 | 0.0410 | 0.1254 | ↑ | 1.14 |
| Q9NZP8 | Complement C1r subcomponent-like protein     | 4.23 | 0.0417 | 0.1254 | ↑ | 1.27 |
| P02753 | Retinol-binding protein 4                    | 4.22 | 0.0421 | 0.1254 | ↑ | 1.36 |
| P00742 | Coagulation factor X                         | 4.21 | 0.0423 | 0.1254 | ↑ | 1.11 |
| P36980 | Complement factor H-related protein 2        | 3.72 | 0.0559 | 0.1628 | ↑ | 1.31 |
| P07195 | L-lactate dehydrogenase B chain              | 3.68 | 0.0572 | 0.1637 | ↑ | 1.16 |
| P02748 | Complement component C9                      | 3.64 | 0.0585 | 0.1646 | ↓ | 0.91 |
| P01024 | Complement C3                                | 3.56 | 0.0615 | 0.1702 | ↑ | 1.13 |
| P01876 | Immunoglobulin heavy constant alpha 1        | 3.4  | 0.0675 | 0.1837 | ↑ | 1.14 |
| P02743 | Serum amyloid P-component                    | 3.33 | 0.0705 | 0.1888 | ↑ | 1.12 |
| P05452 | Tetranectin                                  | 3.21 | 0.0756 | 0.1992 | ↑ | 1.11 |
| P20742 | Pregnancy zone protein                       | 2.87 | 0.0930 | 0.2412 | ↓ | 0.76 |
| P00740 | Coagulation factor IX                        | 2.83 | 0.0949 | 0.2424 | ↑ | 1.12 |
| P01859 | Immunoglobulin heavy constant gamma 2        | 2.55 | 0.1125 | 0.2830 | ↑ | 1.13 |
| P00748 | Coagulation factor XII                       | 2.49 | 0.1170 | 0.2899 | ↑ | 1.14 |
| P68871 | Hemoglobin subunit beta                      | 2.3  | 0.1315 | 0.3166 | ↑ | 1.33 |
| P02787 | Serotransferrin                              | 2.3  | 0.1316 | 0.3166 | ↑ | 1.05 |
| P01011 | Alpha-1-antichymotrypsin                     | 2.27 | 0.1347 | 0.3194 | ↑ | 1.06 |
| P07737 | Profilin-1                                   | 2.07 | 0.1526 | 0.3568 | ↓ | 0.75 |
| Q92954 | Proteoglycan 4                               | 2.03 | 0.1565 | 0.3608 | ↓ | 0.88 |
| P13671 | Complement component C6                      | 1.86 | 0.1745 | 0.3968 | ↑ | 1.06 |
| P09871 | Complement C1s subcomponent                  | 1.84 | 0.1776 | 0.3984 | ↑ | 1.06 |
| P07358 | Complement component C8 beta chain           | 1.77 | 0.1856 | 0.4054 | ↓ | 0.91 |
| Q03591 | Complement factor H-related protein 1        | 1.77 | 0.1856 | 0.4054 | ↑ | 1.19 |

|        |                                                                        |      |        |        |   |      |
|--------|------------------------------------------------------------------------|------|--------|--------|---|------|
| P02654 | Apolipoprotein C-I                                                     | 1.55 | 0.2147 | 0.4629 | ↓ | 0.69 |
| P48740 | Mannan-binding lectin serine protease 1                                | 1.43 | 0.2336 | 0.4971 | ↑ | 1.10 |
| P02760 | Protein AMBP                                                           | 1.41 | 0.2371 | 0.4982 | ↑ | 1.08 |
| P02790 | Hemopexin                                                              | 1.37 | 0.2439 | 0.5033 | ↓ | 0.94 |
| P29622 | Kallistatin                                                            | 1.34 | 0.2484 | 0.5033 | ↑ | 1.06 |
| P04004 | Vitronectin                                                            | 1.34 | 0.2486 | 0.5033 | ↓ | 0.96 |
| P14618 | Pyruvate kinase PKM                                                    | 1.32 | 0.2530 | 0.5060 | ↓ | 0.84 |
| P22792 | Carboxypeptidase N subunit 2                                           | 1.26 | 0.2639 | 0.5215 | ↑ | 1.06 |
| P17936 | Insulin-like growth factor-binding protein 3                           | 1.21 | 0.2727 | 0.5275 | ↓ | 0.91 |
| Q96PD5 | N-acetylmuramoyl-L-alanine amidase                                     | 1.21 | 0.2734 | 0.5275 | ↓ | 0.93 |
| P01019 | Angiotensinogen                                                        | 1.19 | 0.2767 | 0.5275 | ↓ | 0.89 |
| Q96KN2 | Beta-Ala-His dipeptidase                                               | 1.17 | 0.2808 | 0.5275 | ↓ | 0.92 |
| P02652 | Apolipoprotein A-II                                                    | 1.16 | 0.2828 | 0.5275 | ↓ | 0.97 |
| P27169 | Serum paraoxonase/arylesterase 1                                       | 1.13 | 0.2894 | 0.5338 | ↑ | 1.11 |
| P22105 | Tenascin-X                                                             | 1.08 | 0.3001 | 0.5474 | ↑ | 1.13 |
| P09172 | Dopamine beta-hydroxylase                                              | 0.95 | 0.3314 | 0.5980 | ↑ | 1.11 |
| P60174 | Triosephosphate isomerase                                              | 0.89 | 0.3481 | 0.6213 | ↓ | 0.86 |
| P15169 | Carboxypeptidase N catalytic chain                                     | 0.8  | 0.3724 | 0.6411 | ↑ | 1.07 |
| P08185 | Corticosteroid-binding globulin                                        | 0.8  | 0.3725 | 0.6411 | ↓ | 0.87 |
| P23528 | Cofilin-1                                                              | 0.8  | 0.3737 | 0.6411 | ↑ | 1.11 |
| P80108 | Phosphatidylinositol-glycan-specific phospholipase D                   | 0.79 | 0.3746 | 0.6411 | ↑ | 1.08 |
| P02775 | Platelet basic protein                                                 | 0.78 | 0.3801 | 0.6438 | ↓ | 0.78 |
| P06681 | Complement C2                                                          | 0.72 | 0.3974 | 0.6663 | ↓ | 0.94 |
| P00734 | Prothrombin                                                            | 0.67 | 0.4130 | 0.6745 | ↑ | 1.03 |
| P60709 | Actin, cytoplasmic 1                                                   | 0.67 | 0.4157 | 0.6745 | ↑ | 1.03 |
| P35858 | Insulin-like growth factor-binding protein complex acid labile subunit | 0.66 | 0.4173 | 0.6745 | ↓ | 0.94 |
| P02647 | Apolipoprotein A-I                                                     | 0.66 | 0.4185 | 0.6745 | ↓ | 0.89 |
| P02763 | Alpha-1-acid glycoprotein 1                                            | 0.63 | 0.4285 | 0.6769 | ↓ | 0.99 |
| P04075 | Fructose-bisphosphate aldolase A                                       | 0.62 | 0.4332 | 0.6769 | ↓ | 0.95 |
| P18428 | Lipopolysaccharide-binding protein                                     | 0.62 | 0.4335 | 0.6769 | ↓ | 0.91 |
| P01834 | Immunoglobulin kappa constant                                          | 0.61 | 0.4363 | 0.6769 | ↓ | 0.98 |
| P04196 | Histidine-rich glycoprotein                                            | 0.58 | 0.4474 | 0.6877 | ↑ | 1.08 |
| Q9Y6R7 | IgG Fc-binding protein                                                 | 0.56 | 0.4560 | 0.6906 | ↑ | 1.03 |
| P08697 | Alpha-2-antiplasmin                                                    | 0.55 | 0.4594 | 0.6906 | ↓ | 0.97 |
| Q14624 | Inter-alpha-trypsin inhibitor heavy chain H4                           | 0.54 | 0.4618 | 0.6906 | ↑ | 1.02 |
| P00738 | Haptoglobin                                                            | 0.53 | 0.4680 | 0.6936 | ↓ | 0.60 |
| O43866 | CD5 antigen-like                                                       | 0.5  | 0.4793 | 0.6981 | ↓ | 0.93 |
| P0C0L5 | Complement C4-B                                                        | 0.5  | 0.4794 | 0.6981 | ↑ | 1.12 |
| Q12913 | Receptor-type tyrosine-protein phosphatase eta                         | 0.49 | 0.4863 | 0.7020 | ↑ | 1.04 |
| P04070 | Vitamin K-dependent protein C                                          | 0.44 | 0.5103 | 0.7303 | ↓ | 0.88 |
| P12814 | Alpha-actinin-1                                                        | 0.41 | 0.5251 | 0.7388 | ↓ | 0.82 |



|        |                                                       |      |        |        |   |      |
|--------|-------------------------------------------------------|------|--------|--------|---|------|
| P11021 | Endoplasmic reticulum chaperone BiP                   | 0.41 | 0.5252 | 0.7388 | ↑ | 1.02 |
| P04275 | von Willebrand factor                                 | 0.36 | 0.5505 | 0.7679 | ↑ | 1.08 |
| P36955 | Pigment epithelium-derived factor                     | 0.33 | 0.5696 | 0.7839 | ↑ | 1.04 |
| P03952 | Plasma kallikrein                                     | 0.32 | 0.5714 | 0.7839 | ↑ | 1.03 |
| P07360 | Complement component C8 gamma chain                   | 0.3  | 0.5837 | 0.7928 | – | 1.00 |
| P02750 | Leucine-rich alpha-2-glycoprotein                     | 0.29 | 0.5908 | 0.7928 | ↑ | 1.03 |
| Q15582 | Transforming growth factor-beta-induced protein ig-h3 | 0.29 | 0.5922 | 0.7928 | ↓ | 0.95 |
| P49908 | Selenoprotein P                                       | 0.27 | 0.6054 | 0.8027 | ↑ | 1.06 |
| Q16610 | Extracellular matrix protein 1                        | 0.26 | 0.6124 | 0.8027 | ↑ | 1.01 |
| P19823 | Inter-alpha-trypsin inhibitor heavy chain H2          | 0.26 | 0.6141 | 0.8027 | ↓ | 0.97 |
| P19320 | Vascular cell adhesion protein 1                      | 0.23 | 0.6290 | 0.8142 | ↓ | 0.93 |
| P43251 | Biotinidase                                           | 0.23 | 0.6327 | 0.8142 | ↓ | 0.91 |
| P01031 | Complement C5                                         | 0.19 | 0.6677 | 0.8491 | ↓ | 0.98 |
| Q86UX7 | Fermitin family homolog 3                             | 0.18 | 0.6701 | 0.8491 | ↓ | 0.87 |
| P21333 | Filamin-A                                             | 0.18 | 0.6763 | 0.8505 | ↓ | 0.94 |
| P00488 | Coagulation factor XIII A chain                       | 0.13 | 0.7166 | 0.8917 | ↓ | 0.96 |
| Q9UGM5 | Fetuin-B                                              | 0.13 | 0.7198 | 0.8917 | ↓ | 0.98 |
| P04278 | Sex hormone-binding globulin                          | 0.11 | 0.7403 | 0.9103 | ↓ | 0.86 |
| P30041 | Peroxiredoxin-6                                       | 0.09 | 0.7667 | 0.9266 | ↓ | 0.99 |
| P02746 | Complement C1q subcomponent subunit B                 | 0.09 | 0.7703 | 0.9266 | ↑ | 1.02 |
| P02679 | Fibrinogen gamma chain                                | 0.08 | 0.7720 | 0.9266 | ↑ | 1.02 |
| Q9NPH3 | Interleukin-1 receptor accessory protein              | 0.08 | 0.7759 | 0.9266 | ↓ | 0.86 |
| P00338 | L-lactate dehydrogenase A chain                       | 0.07 | 0.7934 | 0.9407 | ↑ | 1.02 |
| P07996 | Thrombospondin-1                                      | 0.06 | 0.8058 | 0.9439 | ↓ | 0.91 |
| P25311 | Zinc-alpha-2-glycoprotein                             | 0.06 | 0.8074 | 0.9439 | ↑ | 1.01 |
| Q9Y490 | Talin-1                                               | 0.06 | 0.8149 | 0.9460 | ↓ | 0.89 |
| P0CG06 | Immunoglobulin lambda constant 3                      | 0.05 | 0.8228 | 0.9485 | ↓ | 0.88 |
| Q96IY4 | Carboxypeptidase B2                                   | 0.03 | 0.8738 | 0.9920 | ↓ | 0.96 |
| O00533 | Neural cell adhesion molecule L1-like protein         | 0.02 | 0.8774 | 0.9920 | ↑ | 1.03 |
| P08571 | Monocyte differentiation antigen CD14                 | 0.02 | 0.8899 | 0.9920 | ↑ | 1.03 |
| P02765 | Alpha-2-HS-glycoprotein                               | 0.02 | 0.8933 | 0.9920 | ↑ | 1.01 |
| P01857 | Immunoglobulin heavy constant gamma 1                 | 0.01 | 0.9034 | 0.9920 | ↓ | 0.98 |
| P01008 | Antithrombin-III                                      | 0.01 | 0.9108 | 0.9920 | ↑ | 1.01 |
| P00915 | Carbonic anhydrase 1                                  | 0.01 | 0.9113 | 0.9920 | ↑ | 1.05 |
| Q6EMK4 | Vasorin                                               | 0.01 | 0.9118 | 0.9920 | ↓ | 0.96 |
| O00391 | Sulfhydryl oxidase 1                                  | 0.01 | 0.9143 | 0.9920 | ↓ | 0.99 |
| P12259 | Coagulation factor V                                  | 0.01 | 0.9247 | 0.9928 | – | 1.00 |
| P07359 | Platelet glycoprotein Ib alpha chain                  | 0.01 | 0.9291 | 0.9928 | ↓ | 0.98 |
| P06727 | Apolipoprotein A-IV                                   | 0.01 | 0.9391 | 0.9928 | ↑ | 1.01 |
| P26927 | Hepatocyte growth factor-like protein                 | 0    | 0.9457 | 0.9928 | ↓ | 0.98 |
| P13796 | Plastin-2                                             | 0    | 0.9503 | 0.9928 | ↑ | 1.01 |

|        |                                        |   |        |        |   |      |
|--------|----------------------------------------|---|--------|--------|---|------|
| P63104 | 14-3-3 protein zeta/delta              | 0 | 0.9538 | 0.9928 | ↓ | 0.99 |
| P01623 | Immunoglobulin kappa variable 3-20     | 0 | 0.9579 | 0.9928 | ↓ | 0.92 |
| P05154 | Plasma serine protease inhibitor       | 0 | 0.9629 | 0.9928 | ↓ | 0.95 |
| P0C0L4 | Complement C4-A                        | 0 | 0.9748 | 0.9978 | ↑ | 1.01 |
| P22352 | Glutathione peroxidase 3               | 0 | 0.9805 | 0.9978 | ↓ | 0.94 |
| P18206 | Vinculin                               | 0 | 0.9858 | 0.9978 | ↓ | 0.91 |
| Q9UK55 | Protein Z-dependent protease inhibitor | 0 | 0.9926 | 0.9986 | ↓ | 0.99 |
| P01009 | Alpha-1-antitrypsin                    | 0 | 0.9993 | 0.9993 | ↓ | 0.86 |

CHR-T: clinical high-risk participants who transitioned to first episode psychosis; CHR-NT: clinical high-risk participants who did not transition; FDR: false discovery rate; EU-GEI: European Network of National Schizophrenia Networks Studying Gene-Environment Interactions

**eTable 6: Coefficients of variation for proteins across quality control standards in EU-GEI initial experiment**

| Protein                                                                              | Coefficient of variation (%) |
|--------------------------------------------------------------------------------------|------------------------------|
| <b>35 significantly differentially expressed proteins on analysis of covariance:</b> |                              |
| Alpha-2-macroglobulin                                                                | 5.9                          |
| Immunoglobulin heavy constant mu                                                     | 8.7                          |
| Complement component C8 alpha chain                                                  | 20.2                         |
| Vitamin D-binding protein                                                            | 20.3                         |
| Complement C1q subcomponent subunit C                                                | 15.0                         |
| Plasminogen                                                                          | 17.0                         |
| Clusterin                                                                            | 13.5                         |
| Fibulin-1                                                                            | 29.7                         |
| Phospholipid transfer protein                                                        | 16.5                         |
| Complement C1r subcomponent                                                          | 14.8                         |
| Attractin                                                                            | 12.0                         |
| Coagulation factor XI                                                                | 10.5                         |
| Complement factor I                                                                  | 7.8                          |
| Complement factor H                                                                  | 9.1                          |
| Beta-crystallin B2                                                                   | 33.6                         |
| C4b-binding protein alpha chain                                                      | 10.0                         |
| Inter-alpha-trypsin inhibitor heavy chain H1                                         | 13.5                         |
| Ficolin-3                                                                            | 12.0                         |
| Immunoglobulin heavy constant gamma 3                                                | 5.1                          |
| Aminopeptidase N                                                                     | 8.6                          |
| Alpha-crystallin A chain                                                             | 25.7                         |
| Gelsolin                                                                             | 12.4                         |
| Hyaluronan-binding protein 2                                                         | 11.1                         |
| Plasma protease C1 inhibitor                                                         | 13.7                         |
| Transthyretin                                                                        | 29.8                         |
| Beta-2-glycoprotein 1                                                                | 17.8                         |
| Alpha-1B-glycoprotein                                                                | 14.0                         |
| Vitamin K-dependent protein Z                                                        | 19.6                         |
| Complement factor B                                                                  | 5.6                          |
| Heparin cofactor 2                                                                   | 11.0                         |
| Cholinesterase                                                                       | 11.0                         |

|                                                                                                        |      |
|--------------------------------------------------------------------------------------------------------|------|
| Lumican                                                                                                | 8.9  |
| Apolipoprotein E                                                                                       | 13.2 |
| A disintegrin and metalloproteinase with thrombospondin motifs 13                                      | 38.1 |
| Inter-alpha-trypsin inhibitor heavy chain H3                                                           | 14.1 |
| <b>Proteins not included in list above that were among 10% highest-weighted proteins in Model 1a:</b>  |      |
| Vitamin K dependent protein S                                                                          | 12.3 |
| Complement component 6                                                                                 | 7.0  |
| Retinol-binding protein 4                                                                              | 33.1 |
| Alpha-2-antiplasmin                                                                                    | 14.2 |
| <b>Proteins not included in both lists above that were among the 10 proteins included in Model 2b:</b> |      |
| N-acetylmuramoyl-L-alanine- amidase                                                                    | 9.5  |

**eTable 7: Summary of protein-protein interactions identified from the BIOGRID database for significantly differentially expressed proteins between CHR-T and CHR-NT in EU-GEI initial experiment**

| <b>Interactor A</b>      | <b>Interactor B</b>           | <b>Experimental system type</b> | <b>Notes</b>                                                                                                                                                                                                                                                                                                                                                                               | <b>Source (Pubmed ID)</b>         |
|--------------------------|-------------------------------|---------------------------------|--------------------------------------------------------------------------------------------------------------------------------------------------------------------------------------------------------------------------------------------------------------------------------------------------------------------------------------------------------------------------------------------|-----------------------------------|
| Alpha-2-macroglobulin    | Apolipoprotein E              | Affinity capture – Western      | Two-dimensional non-denaturing gradient gel electrophoresis of human plasma resulted in the separation of an apolipoprotein E-containing complex which co-migrated with plasma alpha-2-macroglobulin                                                                                                                                                                                       | Krimbou et al 1998 (9831625)      |
| Alpha-2-macroglobulin    | Apolipoprotein E              | Reconstituted complex           | Isolation of alpha-2-macroglobulin by gel filtration chromatography, electroelution, or immunoprecipitation resulted in co-isolation of apolipoprotein E                                                                                                                                                                                                                                   | Krimbou et al 1998 (9831625)      |
| Transthyretin            | Alpha-2-macroglobulin         | Two-hybrid                      | Yeast two-hybrid study. Directionality predicted by naïve Bayesian classifier (alpha-2-microglobulin upstream of transthyretin)                                                                                                                                                                                                                                                            | Vinayagam et al 2011 (21900206)   |
| Alpha-2-macroglobulin    | Apolipoprotein E              | Two-hybrid                      | Yeast two-hybrid study                                                                                                                                                                                                                                                                                                                                                                     | Soler-Lopez et al 2011 (21163940) |
| Transthyretin            | Clusterin                     | Reconstituted complex           | Interaction between clusterin and transthyretin (TTR) proteins including wild-type TTR and TTR variants V30M and L55P was assessed using a glutathione S-transferase pull-down assay. Clusterin was found to strongly interact with wild-type TTR and TTR variants V30M and L55P under acidic conditions. Clusterin was also found to inhibit the amyloid fibril formation of TTR variants | Lee et al 2009 (19664600)         |
| Apolipoprotein E         | Phospholipid transfer protein | Affinity capture – Western      | Co-elution on chromatography of HepG2 (human hepatoma cell line) cell culture medium. When medium subjected to chromatography on an anti-apolipoprotein E affinity column, a portion of phospholipid transfer protein applied was bound and could be eluted together with apolipoprotein E at low pH                                                                                       | Siggins et al 2003 (12810820)     |
| Complement C1r           | Plasma protease C1 inhibitor  | Co-fractionation                | Interactions analysed by sucrose-density-gradient ultracentrifugation and sodium dodecyl sulphate/polyacrylamide-gel electrophoresis. The interaction of C1 inhibitor with dimeric C1r in the presence of EDTA resulted into two bimolecular complexes accounting for a disruption of C1r                                                                                                  | Chesne et al 1982 (6282262)       |
| Alpha crystallin A chain | Beta-crystallin B2            | Two-hybrid                      | Mammalian two-hybrid study                                                                                                                                                                                                                                                                                                                                                                 | Fu et al 2002 (11700327)          |

|                          |                          |                            |                                   |                          |
|--------------------------|--------------------------|----------------------------|-----------------------------------|--------------------------|
| Beta-crystallin B2       | Alpha crystallin A chain | Two-hybrid                 | Mammalian two-hybrid study        | Fu et al 2002 (11700327) |
| Beta-crystallin B2       | Alpha crystallin A chain | Affinity capture – Western | Complex formation on Western blot | Fu et al 2002 (11700327) |
| Alpha crystallin A chain | Beta-crystallin B2       | Two-hybrid                 | Mammalian two-hybrid study        | Fu et al 2003 (12601044) |

BIOGRID database: <https://thebiogrid.org/>

**eTable 8: Functional enrichment analysis of differentially expressed proteins (following false discovery rate correction) between CHR-T and CHR-NT in EU-GEI initial experiment: 6 KEGG pathways significantly enriched**

| KEGG pathway                        | Count in gene set | Fisher's exact test <i>p</i> (corrected for false discovery rate) |
|-------------------------------------|-------------------|-------------------------------------------------------------------|
| Complement and coagulation cascades | 13 of 78          | 2.23E-21                                                          |
| Staphylococcus aureus infection     | 6 of 51           | 5.29E-09                                                          |
| Pertussis                           | 4 of 74           | 6.38E-05                                                          |
| Cholesterol metabolism              | 3 of 48           | 0.00047                                                           |
| Systemic lupus erythematosus        | 3 of 94           | 0.0025                                                            |
| Prion diseases                      | 2 of 33           | 0.0058                                                            |

CHR-T: clinical high-risk participants who transitioned to first episode psychosis; CHR-NT: clinical high-risk participants who did not transition; EU-GEI: European Network of National Schizophrenia Networks Studying Gene-Environment Interactions; KEGG: Kyoto Encyclopedia of Genes and Genomes  
<https://www.genome.jp/kegg/>

**eTable 9: Results of enzyme-linked immunosorbent assays in CHR-T and CHR-NT participants in EU-GEI initial experiment**

|                                                | <b>CHR-T mean (SD)</b>  | <b>CHR-NT mean (SD)</b> | <b>t</b> | <b>p</b> | <b>Corrected p (5% FDR)</b> |
|------------------------------------------------|-------------------------|-------------------------|----------|----------|-----------------------------|
| <b>Alpha-2-macroglobulin (µg/ml)</b>           | 1173.1<br>(459.1)       | 11501.7<br>(711.1)      | 3.2202   | 0.002    | 0.018                       |
| <b>Apolipoprotein E (ng/ml)<sup>a</sup></b>    | 163751.3<br>(47433.8)   | 151740.6<br>(50903.5)   | -1.3449  | 0.182    | 0.387                       |
| <b>Complement C1q (ng/ml)</b>                  | 82811.7<br>(35347.1)    | 80204.6<br>(33535.8)    | -0.4153  | 0.679    | 0.724                       |
| <b>Complement C1r (µg/ml)</b>                  | 65008.9<br>(27901.6)    | 52803.9<br>(18481.6)    | -2.7099  | 0.008    | 0.036                       |
| <b>Complement C4 binding protein (ng/ml)</b>   | 495765.9<br>(222274.7)  | 482208.2<br>(192019.3)  | -0.3538  | 0.724    | 0.724                       |
| <b>Complement C8 (ng/ml)</b>                   | 58233.5<br>(22885.2)    | 55706.0<br>(21938.2)    | -0.6196  | 0.537    | 0.690                       |
| <b>Complement factor H (ng/ml)<sup>b</sup></b> | 701713.1<br>(207717.4)  | 663292.1<br>(199397.1)  | -1.0112  | 0.315    | 0.473                       |
| <b>Immunoglobulin M (ng/ml)</b>                | 1752941.0<br>(770671.5) | 1941142.0<br>(936493.0) | 1.2460   | 0.215    | 0.387                       |
| <b>Plasminogen (ng/ml)</b>                     | 206880.2<br>(73232.4)   | 176929.9<br>(62709.8)   | -2.3786  | 0.020    | 0.060                       |

Data available for 48 CHR-T and 84 CHR-NT, except for <sup>a</sup>Apolipoprotein E (46 CHR-T, 84 CHR-NT) and <sup>b</sup>Complement factor H (45 CHR-T, 82 CHR-NT).

Means (and standard deviations) are presented and are compared using 2-sided t-test with unequal variances.

CHR-T: clinical high-risk participants who transitioned to first episode psychosis; CHR-NT: clinical high-risk participants who did not transition; SD: standard deviation; FDR: false discovery rate; EU-GEI: European Network of National Schizophrenia Networks Studying Gene-Environment Interactions



**eTable 10: Correlations between 5 proteins assessed by ELISA and by mass spectrometry in EU-GEI initial experiment**

| <b>Protein</b>          | <b>Spearman's rho</b> | <b><i>p</i></b> | <b>Corrected <i>p</i><br/>(5% FDR)</b> |
|-------------------------|-----------------------|-----------------|----------------------------------------|
| Alpha-2-macroglobulin   | 0.25                  | 0.0049          | 0.0080                                 |
| Plasminogen             | 0.47                  | <0.0001         | <0.0003                                |
| Complement component 1r | 0.11                  | 0.2089          | 0.2611                                 |
| Complement factor H     | 0.07                  | 0.4160          | 0.4160                                 |
| Apolipoprotein E        | 0.41                  | <0.0001         | <0.0003                                |

ELISA: enzyme immunosorbent immunoassay; EU-GEI: European Network of National Schizophrenia Networks Studying Gene-Environment Interactions; FDR: false discovery rate

**eTable 11: Comparison of characteristics for participants included in replication experiment (N=135) from total EU-GEI clinical high risk cohort (N=344)**

|                                                    | Missing data, n (%) | Included, N = 135<br>(49 CHR-T, 86 CHR-NT)                                                         | Not included, N = 209<br>(CHR-T 16, CHR-NT 193)                                                     | t/ $\chi^2$ | p     | Corrected p (5% FDR) |
|----------------------------------------------------|---------------------|----------------------------------------------------------------------------------------------------|-----------------------------------------------------------------------------------------------------|-------------|-------|----------------------|
| <b>Baseline age in years, mean (SD)</b>            | 0                   | 22.2 (4.8)                                                                                         | 22.5 (5.0)                                                                                          | -0.570      | 0.569 | 0.751                |
| <b>Sex, n (%)</b>                                  | 0                   | 82 male (60.7%)<br>53 female (39.3%)                                                               | 103 male (49.3%)<br>106 female (50.7%)                                                              | 4.322       | 0.037 | 0.320                |
| <b>Baseline BMI in kg/m<sup>2</sup>, mean (SD)</b> | 50 (14.5%)          | 23.7 (4.1)                                                                                         | 24.2 (5.8)                                                                                          | -0.936      | 0.350 | 0.700                |
| <b>Baseline years in education, mean (SD)</b>      | 38 (11.0%)          | 14.3 (2.9)                                                                                         | 14.5 (3.2)                                                                                          | -0.574      | 0.566 | 0.751                |
| <b>Ethnicity, n (%)</b>                            | 0                   | 93 white (68.9%)<br>14 black (10.4%)<br>28 other (20.7%)                                           | 154 white (73.7%)<br>20 black (9.6%)<br>35 other (16.7%)                                            | 1.030       | 0.597 | 0.751                |
| <b>Ever used cannabis, n (%)</b>                   | 10 (2.9%)           | 101 yes (74.8%)<br>31 no (23.0%)<br>3 not known (2.2%)                                             | 143 yes (68.4%)<br>59 no (28.2%)<br>7 not known (3.3%)                                              | 1.328       | 0.249 | 0.619                |
| <b>Baseline cannabis use, n (%)</b>                | 95 (27.6%)          | 43 yes (31.9%)<br>60 no (44.4%)<br>32 not known (23.7%)                                            | 45 yes (21.5%)<br>101 no (48.3%)<br>63 not known (30.1%)                                            | 3.155       | 0.076 | 0.320                |
| <b>Baseline tobacco use, n (%)</b>                 | 38 (11.0%)          | 72 yes (53.3%)<br>51 no (37.8%)<br>12 not known (8.9%)                                             | 89 yes (42.6%)<br>94 no (45.0%)<br>26 not known (12.4%)                                             | 2.893       | 0.089 | 0.320                |
| <b>Baseline alcohol use, n (%)</b>                 | 12 (3.5%)           | 36 yes (26.7%)<br>97 no (71.9%)<br>2 not known (1.5%)                                              | 137 yes (65.6%)<br>62 no (29.7%)<br>10 not known (4.8%)                                             | 0.640       | 0.424 | 0.751                |
| <b>Baseline medication use, n (%)</b>              | 87 (25.3%)          | 51 yes (37.8%)<br>Antidepressant 34<br>Antipsychotic 15<br>Hypnotic 4<br>Other 12<br>50 no (37.0%) | 77 yes (36.8%)<br>Antidepressant 57<br>Antipsychotic 16<br>Hypnotic 19<br>Other 24<br>79 no (37.8%) | 0.032       | 0.859 | 0.960                |

|                                                       |            |                      |                      |        |       |       |
|-------------------------------------------------------|------------|----------------------|----------------------|--------|-------|-------|
|                                                       |            | 34 not known (25.2%) | 53 not known (25.4%) |        |       |       |
| <b>Baseline GAF symptoms score, mean (SD)</b>         | 27 (7.8%)  | 54.4 (10.2)          | 55.6 (10.0)          | -1.103 | 0.271 | 0.619 |
| <b>Baseline GAF disability score, mean (SD)</b>       | 12 (3.5%)  | 55.5 (13.7)          | 55.4 (11.3)          | 0.006  | 0.996 | 0.996 |
| <b>Baseline SANS total composite score, mean (SD)</b> | 45 (13.1%) | 17.1 (12.7)          | 14.6 (10.8)          | 1.784  | 0.075 | 0.320 |
| <b>Baseline SANS total global score, mean (SD)</b>    | 29 (8.4%)  | 5.6 (3.8)            | 5.4 (3.5)            | 0.510  | 0.610 | 0.751 |
| <b>Baseline BPRS total score, mean (SD)</b>           | 25 (7.3%)  | 44.9 (11.2)          | 42.9 (9.6)           | 1.650  | 0.100 | 0.320 |
| <b>Baseline MADRS total score, mean (SD)</b>          | 16 (4.7%)  | 18.8 (9.5)           | 18.9 (8.9)           | -0.126 | 0.900 | 0.960 |

<sup>a</sup> Poor functioning: GAF disability score ≤60; good functioning: GAF disability score >60

Tobacco use was defined as daily use for at least 1 month over the previous 12 months. Alcohol use was defined as at least 12 or more alcoholic beverages over the previous 12 months. Missing data excluded in hypothesis tests.

EU-GEI: European Network of National Schizophrenia Networks Studying Gene-Environment Interactions; CHR-T: clinical high risk, transitioned to psychosis; CHR-NT: clinical high risk, did not transition to psychosis; EU-GEI: European Network of National Schizophrenia Networks Studying Gene-Environment Interactions; CHR-T: clinical high risk, transitioned to psychosis; CHR-NT: clinical high risk, did not transition to psychosis; FDR: false discovery rate; BMI: body mass index; GAF: General Assessment of Functioning; SANS: Scale for the Assessment of Negative Symptoms; BPRS: Brief Psychiatric Rating Scale; MADRS: Montgomery Asberg Depression Rating Scale; BMI: body mass index; GAF: General Assessment of Functioning; SANS: Scale for the Assessment of Negative Symptoms; BPRS: Brief Psychiatric Rating Scale; MADRS: Montgomery Asberg Depression Rating Scale

**eTable 12: Sample characteristics for CHR-T and CHR-NT groups in the replication experiment**

|                                                    | Missing data, n (%) | CHR-T<br>N = 49                                                                                                          | CHR-NT<br>N = 86                                                                                                         | t/ $\chi^2$      | p     | Corrected p (5% FDR) |
|----------------------------------------------------|---------------------|--------------------------------------------------------------------------------------------------------------------------|--------------------------------------------------------------------------------------------------------------------------|------------------|-------|----------------------|
| <b>Baseline age in years, mean (SD)</b>            | 0                   | 22.0 (4.7)                                                                                                               | 22.3 (4.9)                                                                                                               | t = -0.339       | 0.735 | 0.776                |
| <b>Sex, n (%)</b>                                  | 0                   | 26 male (53%)<br>23 female (47%)                                                                                         | 56 male (65%)<br>30 female (35%)                                                                                         | $\chi^2 = 1.902$ | 0.168 | 0.290                |
| <b>Baseline BMI in kg/m<sup>2</sup>, mean (SD)</b> | 21 (15.6%)          | 24.5 (4.5)                                                                                                               | 23.2 (3.8)                                                                                                               | t = 1.722        | 0.088 | 0.186                |
| <b>Baseline years in education, mean (SD)</b>      | 12 (8.8%)           | 14.0 (3.1)                                                                                                               | 14.3 (2.6)                                                                                                               | t = -0.573       | 0.568 | 0.762                |
| <b>Ethnicity, n (%)</b>                            | 0                   | 31 white (63.3%)<br>10 black (20.4%)<br>8 other (16.3%)                                                                  | 62 white (72.1%)<br>4 black (4.7%)<br>20 other (23.3%)                                                                   | $\chi^2 = 8.549$ | 0.014 | 0.057                |
| <b>Ever used cannabis, n (%)</b>                   | 3 (2.2%)            | 35 yes (71.4%)<br>12 no (24.5%)<br>2 not known (4.1%)                                                                    | 66 yes (76.7%)<br>19 no (22.1%)<br>1 not known (1.2%)                                                                    | $\chi^2 = 0.170$ | 0.680 | 0.762                |
| <b>Baseline cannabis use, n (%)</b>                | 32 (23.7%)          | 14 yes (28.6%)<br>22 no (44.9%)<br>13 not known (26.5%)                                                                  | 29 yes (33.7%)<br>38 no (44.2%)<br>19 not known (22.1%)                                                                  | $\chi^2 = 0.186$ | 0.666 | 0.762                |
| <b>Baseline tobacco use, n (%)</b>                 | 12 (8.9%)           | 19 yes (38.8%)<br>23 no (46.9%)<br>7 not known (14.3%)                                                                   | 53 yes (61.6%)<br>28 no (32.6%)<br>5 not known (5.8%)                                                                    | $\chi^2 = 4.647$ | 0.031 | 0.074                |
| <b>Baseline alcohol use, n (%)</b>                 | 2 (1.5%)            | 34 yes (69.4%)<br>14 no (28.6%)<br>1 not known (2.0%)                                                                    | 63 yes (73.3%)<br>22 no (25.6%)<br>1 not known (1.2%)                                                                    | $\chi^2 = 0.168$ | 0.682 | 0.762                |
| <b>Baseline medication use, n (%)</b>              | 34 (25.2%)          | 20 yes (40.8%)<br>Antidepressant 13<br>Antipsychotic 10<br>Hypnotic 2<br>Other 4<br>20 no (40.8%)<br>9 not known (18.4%) | 31 yes (36.0%)<br>Antidepressant 21<br>Antipsychotic 5<br>Hypnotic 2<br>Other 8<br>30 no (34.9%)<br>25 not known (29.1%) | $\chi^2 = 0.006$ | 0.936 | 0.936                |

|                                                                     |            |                                                                                  |                                                                                    |                   |        |        |
|---------------------------------------------------------------------|------------|----------------------------------------------------------------------------------|------------------------------------------------------------------------------------|-------------------|--------|--------|
| <b>Baseline GAF symptoms score, mean (SD)</b>                       | 4 (3.0%)   | 53.0 (10.1)                                                                      | 55.1 (10.2)                                                                        | t = -1.089        | 0.278  | 0.440  |
| <b>Baseline GAF disability score, mean (SD)</b>                     | 4 (3.0%)   | 53.0 (12.6)                                                                      | 56.8 (14.1)                                                                        | t = -1.531        | 0.128  | 0.243  |
| <b>Baseline SANS total composite score, mean (SD)</b>               | 15 (11.1%) | 20.9 (14.1)                                                                      | 14.9 (11.4)                                                                        | t = 2.389         | 0.019  | 0.060  |
| <b>Baseline SANS total global score, mean (SD)</b>                  | 10 (7.4%)  | 6.6 (4.1)                                                                        | 5.0 (3.5)                                                                          | t = 2.252         | 0.026  | 0.071  |
| <b>Baseline BPRS total score, mean (SD)</b>                         | 10 (7.4%)  | 48.1 (11.2)                                                                      | 43.1 (10.8)                                                                        | t = 2.456         | 0.015  | 0.057  |
| <b>Baseline MADRS total score, mean (SD)</b>                        | 6 (4.4%)   | 19.9 (10.2)                                                                      | 18.1 (9.1)                                                                         | t = 1.004         | 0.317  | 0.463  |
| <b>2 year GAF symptoms score, mean (SD)<sup>a</sup></b>             | 49 (36.3%) | 43.6 (14.1)                                                                      | 63.5 (10.6)                                                                        | t = -7.281        | <0.001 | <0.007 |
| <b>2 year GAF disability score, mean (SD)<sup>b</sup></b>           | 44 (32.6%) | 45.3 (9.5)                                                                       | 65.1 (13.9)                                                                        | t = -7.969        | <0.001 | <0.007 |
| <b>2 year GAF disability score, dichotomous outcome<sup>c</sup></b> | 44 (32.6%) | 28 poor functioning (57.1%)<br>2 good functioning (4.1%)<br>19 not known (38.8%) | 23 poor functioning (26.7%)<br>38 good functioning (44.2%)<br>25 not known (29.1%) | $\chi^2 = 25.261$ | <0.001 | <0.007 |

<sup>a</sup> Data available for 86 of 135 participants (CHR-NT n=27, CHR-T n=59)

<sup>b</sup> Data available for 91 of 135 participants (CHR-NT n=30, CHR-T n=61)

<sup>c</sup> Poor functioning: GAF disability score  $\leq 60$ ; good functioning: GAF disability score  $>60$

Tobacco use was defined as daily use for at least 1 month over the previous 12 months.

Alcohol use was defined as at least 12 or more alcoholic beverages over the previous 12 months.

Missing data excluded in hypothesis tests.

EU-GEI: European Network of National Schizophrenia Networks Studying Gene-Environment Interactions; CHR-T: clinical high risk, transitioned to psychosis; CHR-NT: clinical high risk, did not transition to psychosis; FDR: false discovery rate; BMI: body mass index; GAF: General Assessment of Functioning; SANS: Scale for the Assessment of Negative Symptoms; BPRS: Brief Psychiatric Rating Scale; MADRS: Montgomery Asberg Depression Rating Scale

**eTable 13: Results of ANCOVA (adjusted for age, sex, BMI, years in education, tobacco use and ethnicity) and fold changes (CHR-T vs. CHR-NT) for proteins identified in EU-GEI baseline plasma samples in the replication experiment**

| Uniprot no. | Protein name                                                    | F      | <i>p</i> | Corrected <i>p</i><br>(5% FDR) | Direction<br>of effect | Ratio of<br>means<br>(T vs. NT) |
|-------------|-----------------------------------------------------------------|--------|----------|--------------------------------|------------------------|---------------------------------|
| P01023      | Alpha-2-macroglobulin                                           | 264.41 | 9.81E-33 | 1.17E-30                       | ↓                      | 0.24                            |
| P01871      | Immunoglobulin heavy constant mu                                | 109.92 | 7.11E-19 | 4.23E-17                       | ↓                      | 0.33                            |
| P00747      | Plasminogen                                                     | 78.47  | 6.43E-15 | 2.55E-13                       | ↑                      | 1.30                            |
| P10909      | Clusterin                                                       | 73.41  | 3.17E-14 | 9.44E-13                       | ↑                      | 1.36                            |
| P01011      | Alpha-1-antichymotrypsin                                        | 68.88  | 1.38E-13 | 3.28E-12                       | ↑                      | 1.38                            |
| G3XAM2      | Complement factor I                                             | 65.48  | 4.24E-13 | 8.4E-12                        | ↑                      | 1.27                            |
| P0DOY3      | Immunoglobulin lambda constant 3                                | 58.29  | 4.9E-12  | 8.33E-11                       | ↓                      | 0.56                            |
| P01860      | Immunoglobulin heavy constant gamma 3                           | 56.09  | 1.06E-11 | 1.42E-10                       | ↓                      | 0.52                            |
| P08603      | Complement factor H (H factor 1)                                | 56.05  | 1.08E-11 | 1.42E-10                       | ↑                      | 1.18                            |
| P13671      | Complement component C6                                         | 55.01  | 1.55E-11 | 1.7E-10                        | ↑                      | 1.39                            |
| P04004      | Vitronectin                                                     | 54.97  | 1.57E-11 | 1.7E-10                        | ↑                      | 1.33                            |
| P22792      | Carboxypeptidase N subunit 2                                    | 52.23  | 4.18E-11 | 4.15E-10                       | ↑                      | 1.29                            |
| P07360      | Complement component C8 gamma chain                             | 49.11  | 1.3E-10  | 1.19E-09                       | ↑                      | 1.28                            |
| P08571      | Monocyte differentiation antigen CD14                           | 47.31  | 2.52E-10 | 2.14E-09                       | ↑                      | 1.39                            |
| P01031      | Complement C5                                                   | 44.69  | 6.71E-10 | 5.32E-09                       | ↑                      | 1.19                            |
| B7ZKJ8      | ITIH4 protein                                                   | 43.28  | 1.14E-09 | 8.51E-09                       | ↑                      | 1.21                            |
| P07359      | Platelet glycoprotein Ib alpha chain                            | 35.10  | 2.79E-08 | 1.96E-07                       | ↑                      | 1.40                            |
| P15169      | Carboxypeptidase N catalytic chain (CPN)                        | 33.90  | 4.53E-08 | 2.99E-07                       | ↑                      | 1.33                            |
| P36955      | Pigment epithelium-derived factor                               | 32.23  | 8.97E-08 | 5.62E-07                       | ↑                      | 1.22                            |
| P07357      | Complement component C8 alpha chain                             | 31.63  | 1.15E-07 | 6.82E-07                       | ↑                      | 1.25                            |
| P27169      | Serum paraoxonase/arylesterase 1                                | 30.66  | 1.71E-07 | 9.69E-07                       | ↑                      | 1.30                            |
| Q96IY4      | Carboxypeptidase B2                                             | 29.85  | 2.39E-07 | 1.29E-06                       | ↑                      | 1.41                            |
| Q16610      | Extracellular matrix protein 1                                  | 26.68  | 9.12E-07 | 4.72E-06                       | ↑                      | 1.38                            |
| P04003      | C4b-binding protein alpha chain                                 | 26.26  | 1.09E-06 | 5.41E-06                       | ↓                      | 0.77                            |
| P12259      | Coagulation factor V                                            | 24.43  | 2.4E-06  | 1.14E-05                       | ↑                      | 1.30                            |
| P06727      | Apolipoprotein A-IV                                             | 23.96  | 2.95E-06 | 1.35E-05                       | ↑                      | 1.16                            |
| P80108      | Phosphatidylinositol-glycan-specific phospholipase D (PI-G PLD) | 22.81  | 4.87E-06 | 2.15E-05                       | ↑                      | 1.27                            |

|        |                                                                              |       |          |          |   |      |
|--------|------------------------------------------------------------------------------|-------|----------|----------|---|------|
| P05155 | Plasma protease C1 inhibitor                                                 | 22.67 | 5.19E-06 | 2.00E-04 | ↑ | 1.23 |
| P19827 | Inter-alpha-trypsin inhibitor heavy chain H1                                 | 20.64 | 1.28E-05 | 0.0001   | ↑ | 1.15 |
| P0C0L4 | Complement C4-A (Acidic complement C4)                                       | 19.53 | 2.11E-05 | 0.0001   | ↓ | 0.57 |
| B4E1Z4 | cDNA FLJ55673                                                                | 18.98 | 2.71E-05 | 0.0001   | ↑ | 1.13 |
| P51884 | Lumican                                                                      | 18.90 | 2.81E-05 | 0.0001   | ↑ | 1.26 |
| P00736 | Complement C1r subcomponent                                                  | 18.64 | 3.17E-05 | 0.0001   | ↑ | 1.13 |
| O43866 | CD5 antigen-like                                                             | 18.47 | 3.42E-05 | 0.0001   | ↓ | 0.65 |
| P02765 | Alpha-2-HS-glycoprotein                                                      | 17.11 | 0.0001   | 0.0003   | ↑ | 1.16 |
| P06396 | Gelsolin                                                                     | 16.15 | 0.0001   | 0.0003   | ↑ | 1.15 |
| Q04756 | Hepatocyte growth factor activator                                           | 16.22 | 0.0001   | 0.0003   | ↑ | 1.19 |
| P19823 | Inter-alpha-trypsin inhibitor heavy chain H2                                 | 15.64 | 0.0001   | 0.0003   | ↑ | 1.11 |
| O00391 | Sulfhydryl oxidase 1                                                         | 14.82 | 0.0002   | 0.0006   | ↑ | 1.18 |
| P02748 | Complement component C9                                                      | 13.25 | 0.0004   | 0.0012   | ↑ | 1.19 |
| P00738 | Haptoglobin                                                                  | 11.99 | 0.0007   | 0.0020   | ↓ | 0.49 |
| P02790 | Hemopexin                                                                    | 11.97 | 0.0007   | 0.0020   | ↑ | 1.10 |
| P08697 | Alpha-2-antiplasmin                                                          | 11.36 | 0.0010   | 0.0027   | ↑ | 1.10 |
| P23142 | Fibulin-1                                                                    | 11.37 | 0.0010   | 0.0027   | ↑ | 1.37 |
| P05452 | Tetranectin                                                                  | 11.15 | 0.0011   | 0.0029   | ↑ | 1.15 |
| P06681 | Complement C2                                                                | 10.96 | 0.0012   | 0.0031   | ↑ | 1.18 |
| P02751 | Fibronectin                                                                  | 10.62 | 0.0014   | 0.0035   | ↑ | 1.39 |
| P02649 | Apolipoprotein E                                                             | 10.26 | 0.0017   | 0.0041   | ↑ | 1.21 |
| P07358 | Complement component C8 beta chain                                           | 10.24 | 0.0017   | 0.0041   | ↑ | 1.18 |
| O75882 | Attractin                                                                    | 10.07 | 0.0019   | 0.0044   | ↑ | 1.19 |
| P01834 | Immunoglobulin kappa constant                                                | 10.09 | 0.0019   | 0.0044   | ↓ | 0.74 |
| P00734 | Prothrombin                                                                  | 9.98  | 0.0020   | 0.0046   | ↑ | 1.09 |
| P17936 | Insulin-like growth factor-binding protein 3                                 | 9.46  | 0.0026   | 0.0058   | ↑ | 1.30 |
| P00746 | Complement factor D                                                          | 9.15  | 0.0030   | 0.0066   | ↑ | 1.23 |
| P02675 | Fibrinogen beta chain                                                        | 8.48  | 0.0043   | 0.0093   | ↓ | 0.87 |
| P00488 | Coagulation factor XIII A chain                                              | 8.32  | 0.0046   | 0.0098   | ↑ | 1.26 |
| P43652 | Afamin                                                                       | 8.04  | 0.0053   | 0.0111   | ↑ | 1.10 |
| P35858 | Insulin-like growth factor-binding protein complex acid labile subunit (ALS) | 7.33  | 0.0077   | 0.0158   | ↑ | 1.11 |
| P05543 | T4-binding globulin                                                          | 7.30  | 0.0079   | 0.0159   | ↑ | 1.27 |
| P10643 | Complement component C7                                                      | 7.09  | 0.0088   | 0.0175   | ↑ | 1.29 |
| P02787 | Serotransferrin                                                              | 6.92  | 0.0096   | 0.0187   | ↓ | 0.83 |
| P26927 | Hepatocyte growth factor-like protein (Macrophage stimulatory protein)       | 6.80  | 0.0102   | 0.0193   | ↑ | 1.24 |

|          |                                              |      |        |        |   |      |
|----------|----------------------------------------------|------|--------|--------|---|------|
| P18428   | Lipopolysaccharide-binding protein (LBP)     | 6.81 | 0.0102 | 0.0193 | ↑ | 1.27 |
| P02760   | Protein AMBP                                 | 6.63 | 0.0112 | 0.0208 | ↑ | 1.05 |
| P00450   | Ceruloplasmin                                | 6.38 | 0.0128 | 0.0234 | ↓ | 0.93 |
| P05154   | Plasma serine protease inhibitor             | 6.25 | 0.0137 | 0.0247 | ↑ | 1.15 |
| P02766   | Transthyretin                                | 6.14 | 0.0145 | 0.0258 | ↓ | 0.82 |
| Q14520-2 | Hyaluronan-binding protein 2                 | 6.09 | 0.0149 | 0.0260 | ↑ | 1.20 |
| P02679-2 | Fibrinogen gamma chain                       | 6.07 | 0.0151 | 0.0260 | ↓ | 0.90 |
| P00740   | Coagulation factor IX                        | 5.92 | 0.0164 | 0.0279 | ↑ | 1.10 |
| Q96KN2   | Beta-Ala-His dipeptidase                     | 5.82 | 0.0173 | 0.0290 | ↑ | 1.27 |
| P01019   | Angiotensinogen                              | 5.42 | 0.0215 | 0.0355 | ↑ | 1.12 |
| P04114   | Apolipoprotein B-100                         | 5.29 | 0.0231 | 0.0377 | ↑ | 1.07 |
| P02647   | Apolipoprotein A-I                           | 5.03 | 0.0266 | 0.0428 | ↓ | 0.89 |
| P05546   | Heparin cofactor 2                           | 4.81 | 0.0302 | 0.0479 | ↑ | 1.06 |
| P01009   | Alpha-1-antitrypsin                          | 4.77 | 0.0307 | 0.0481 | ↓ | 0.79 |
| P04275   | von Willebrand factor                        | 4.71 | 0.0319 | 0.0493 | ↑ | 1.37 |
| P02743   | Serum amyloid P-component (SAP)              | 4.68 | 0.0324 | 0.0494 | ↑ | 1.22 |
| P01857   | Immunoglobulin heavy constant gamma 1        | 4.63 | 0.0334 | 0.0503 | ↑ | 1.14 |
| P01008   | Antithrombin-III                             | 4.27 | 0.0408 | 0.0607 | ↓ | 0.91 |
| P25311   | Zinc-alpha-2-glycoprotein                    | 4.08 | 0.0456 | 0.0670 | ↑ | 1.01 |
| P05160   | Coagulation factor XIII B chain              | 3.40 | 0.0675 | 0.0980 | ↑ | 1.06 |
| P22891   | Vitamin K-dependent protein Z                | 3.13 | 0.0795 | 0.1140 | ↑ | 1.10 |
| P02746   | Complement C1q subcomponent subunit B        | 2.85 | 0.0936 | 0.1326 | ↑ | 1.17 |
| P0C0L5   | Complement C4-B (Basic complement C4)        | 2.72 | 0.1014 | 0.1420 | ↑ | 1.09 |
| Q96PD5   | N-acetylmuramoyl-L-alanine amidase           | 2.63 | 0.1075 | 0.1488 | ↑ | 1.05 |
| P01876   | Immunoglobulin heavy constant alpha 1        | 2.54 | 0.1135 | 0.1546 | ↓ | 0.72 |
| P02763   | Alpha-1-acid glycoprotein 1                  | 2.51 | 0.1154 | 0.1546 | ↓ | 0.84 |
| P01042   | Kininogen-1                                  | 2.51 | 0.1156 | 0.1546 | ↑ | 1.03 |
| K7ERI9   | Apolipoprotein C-I                           | 2.17 | 0.1433 | 0.1895 | ↓ | 0.84 |
| Q06033   | Inter-alpha-trypsin inhibitor heavy chain H3 | 2.07 | 0.1524 | 0.1993 | ↑ | 1.13 |
| P02750   | Leucine-rich alpha-2-glycoprotein            | 2.01 | 0.1589 | 0.2055 | ↑ | 1.08 |
| D6RF35   | Vitamin D-binding protein                    | 1.89 | 0.1721 | 0.2202 | ↑ | 1.02 |
| P00748   | Coagulation factor XII                       | 1.85 | 0.1762 | 0.2231 | ↓ | 0.93 |
| P09871   | Complement C1s subcomponent                  | 1.70 | 0.1951 | 0.2444 | ↓ | 0.92 |
| P07996   | Thrombospondin-1                             | 1.11 | 0.2932 | 0.3634 | ↑ | 1.10 |
| Q9NZP8   | Complement C1r subcomponent-like protein     | 1.06 | 0.3051 | 0.3743 | ↑ | 1.12 |
| P02747   | Complement C1q subcomponent subunit C        | 1.02 | 0.3148 | 0.3823 | ↑ | 1.05 |
| P04278   | Sex hormone-binding globulin                 | 0.64 | 0.4244 | 0.5072 | ↑ | 1.17 |



|        |                                        |      |        |        |   |      |
|--------|----------------------------------------|------|--------|--------|---|------|
| P29622 | Kallistatin (Kallikrein inhibitor)     | 0.64 | 0.4262 | 0.5072 | ↑ | 1.02 |
| P03952 | Plasma kallikrein                      | 0.58 | 0.4476 | 0.5274 | ↑ | 1.08 |
| P43251 | Biotinidase (Biotinase)                | 0.55 | 0.4607 | 0.5375 | ↓ | 0.92 |
| P01024 | Complement C3                          | 0.45 | 0.5025 | 0.5775 | ↑ | 1.01 |
| P04196 | Histidine-rich glycoprotein            | 0.45 | 0.5047 | 0.5775 | ↑ | 1.02 |
| P02656 | Apolipoprotein C-III                   | 0.43 | 0.5145 | 0.5831 | ↑ | 1.09 |
| O75636 | Ficolin-3                              | 0.36 | 0.5475 | 0.6146 | ↑ | 1.10 |
| P27918 | Properdin                              | 0.30 | 0.5819 | 0.6472 | ↑ | 1.05 |
| P00742 | Coagulation factor X                   | 0.27 | 0.6070 | 0.6688 | ↑ | 1.06 |
| P02749 | Beta-2-glycoprotein 1                  | 0.23 | 0.6357 | 0.6940 | ↑ | 1.01 |
| P06276 | Acylcholine acylhydrolase              | 0.20 | 0.6588 | 0.7127 | ↑ | 1.01 |
| P08185 | Corticosteroid-binding globulin        | 0.13 | 0.7170 | 0.7687 | – | 1.00 |
| P02671 | Fibrinogen alpha chain                 | 0.08 | 0.7845 | 0.8335 | ↓ | 0.97 |
| P03951 | Coagulation factor XI                  | 0.05 | 0.8228 | 0.8628 | ↑ | 1.12 |
| P19652 | Alpha-1-acid glycoprotein 2 (AGP 2)    | 0.05 | 0.8265 | 0.8628 | ↓ | 0.97 |
| Q9UK55 | Protein Z-dependent protease inhibitor | 0.04 | 0.8393 | 0.8685 | ↑ | 1.01 |
| P07225 | Vitamin K-dependent protein S          | 0.03 | 0.8521 | 0.8741 | – | 1.00 |
| Q5VY30 | Retinol-binding protein                | 0.02 | 0.8787 | 0.8937 | ↓ | 0.97 |
| P68871 | Hemoglobin subunit beta                | 0.02 | 0.9022 | 0.9079 | ↑ | 1.06 |
| P22352 | Glutathione peroxidase 3 (GPx-3)       | 0.01 | 0.9079 | 0.9079 | ↑ | 1.03 |

CHR-T: clinical high-risk participants who transitioned to first episode psychosis; CHR-NT: clinical high-risk participants who did not transition; FDR: false discovery rate; EU-GEI: European Network of National Schizophrenia Networks Studying Gene-Environment Interactions

**eTable 14: Sample characteristics for ALSPAC subsample cases and controls**

|                                                      | <b>Cases<br/>N = 55</b>                                          | <b>Controls<br/>N = 66</b>                                        | <b>t/ <math>\chi^2</math></b> | <b>p</b> |
|------------------------------------------------------|------------------------------------------------------------------|-------------------------------------------------------------------|-------------------------------|----------|
| <b>Sex, n (%)</b>                                    | 22 male (40.0%)<br>33 female (60.0%)                             | 39 male (59.1%)<br>27 female (40.9%)                              | 4.374                         | 0.036    |
| <b>BMI age 12 in<br/>kg/m<sup>2</sup>, mean (SD)</b> | 18.1 (2.8)                                                       | 17.7 (2.5)                                                        | 0.749                         | 0.455    |
| <b>Maternal social<br/>class, n (%)</b>              | 40 non-manual (72.7%)<br>7 manual (12.7%)<br>8 not known (14.6%) | 44 non-manual (66.7%)<br>8 manual (12.1%)<br>14 not known (21.2%) | 0.005                         | 0.946    |

Cases: participants with no PEs age 12 and definite PEs age 18; Controls: participants with no PEs age 12 and no PEs age 18

PEs: psychotic experiences; BMI: body mass index

Missing data excluded in hypothesis tests.

Data for ethnicity are not presented in the table because of potential risk of statistical disclosure due to small cell counts. There were no significant differences between cases and controls for ethnicity ( $\chi^2 = 0.729$ ,  $p = 0.202$ ).

ALSPAC: Avon Longitudinal Study of Parents and Children

**eTable 15: Results of ANCOVA (adjusted for sex, BMI and maternal social class) and fold changes (definite PEs at 18 vs. no PEs at 18) for proteins identified in ALSPAC age 12 plasma samples**

| Uniprot No. | Protein name                                 | F     | p        | Corrected p (5%FDR) | Direction of effect | Ratio of means (PE vs no PE) |
|-------------|----------------------------------------------|-------|----------|---------------------|---------------------|------------------------------|
| P04003      | C4b-binding protein alpha chain              | 24.59 | 2.44E-06 | 0.0006              | ↓                   | 0.77                         |
| P27169      | Serum paraoxonase/arylesterase 1             | 17.78 | 4.94E-05 | 0.0065              | ↓                   | 0.80                         |
| P01871      | Immunoglobulin heavy constant mu             | 16.04 | 0.0001   | 0.0066              | ↓                   | 0.78                         |
| P55103      | Inhibin beta C chain                         | 16.68 | 0.0001   | 0.0066              | ↑                   | 1.31                         |
| P10909      | Clusterin                                    | 12.71 | 0.0005   | 0.0265              | ↓                   | 0.92                         |
| P01591      | Immunoglobulin J chain                       | 9.69  | 0.0023   | 0.1007              | ↓                   | 0.70                         |
| P01860      | Immunoglobulin heavy constant gamma 3        | 9.25  | 0.0029   | 0.1007              | ↓                   | 0.80                         |
| P0DOY3      | Immunoglobulin lambda constant 3             | 8.90  | 0.0035   | 0.1007              | ↓                   | 0.81                         |
| P07225      | Vitamin K-dependent protein S                | 8.83  | 0.0036   | 0.1007              | ↓                   | 0.90                         |
| Q03591      | Complement factor H-related protein 1        | 8.74  | 0.0038   | 0.1007              | ↓                   | 0.79                         |
| P01023      | Alpha-2-macroglobulin                        | 7.92  | 0.0057   | 0.1373              | ↓                   | 0.85                         |
| P01623      | Immunoglobulin kappa variable 3-20           | 7.49  | 0.0072   | 0.1590              | ↓                   | 0.81                         |
| P24593      | Insulin-like growth factor-binding protein 5 | 7.34  | 0.0078   | 0.1590              | ↑                   | 1.26                         |
| P01019      | Angiotensinogen                              | 6.74  | 0.0106   | 0.1943              | ↓                   | 0.91                         |
| P26038      | Moesin                                       | 6.68  | 0.0110   | 0.1943              | ↑                   | 1.16                         |
| P04040      | Catalase                                     | 6.53  | 0.0119   | 0.1971              | ↑                   | 1.36                         |
| P12109      | Collagen alpha-1 (VI) chain                  | 6.36  | 0.0130   | 0.1988              | ↑                   | 1.16                         |
| P08571      | Monocyte differentiation antigen CD14        | 6.29  | 0.0135   | 0.1988              | ↓                   | 0.91                         |
| B9A064      | Immunoglobulin lambda-like polypeptide 5     | 6.03  | 0.0155   | 0.2107              | ↓                   | 0.85                         |
| P09871      | Complement C1s subcomponent                  | 5.99  | 0.0159   | 0.2107              | ↓                   | 0.93                         |
| P08697      | Alpha-2-antiplasmin                          | 5.50  | 0.0207   | 0.2495              | ↓                   | 0.94                         |
| P15151      | Poliovirus receptor                          | 5.44  | 0.0214   | 0.2495              | ↑                   | 1.16                         |
| P01717      | Immunoglobulin lambda variable 3-25          | 5.34  | 0.0226   | 0.2495              | ↓                   | 0.85                         |
| Q12884      | Prolyl endopeptidase FAP                     | 5.34  | 0.0226   | 0.2495              | ↑                   | 1.24                         |
| P00746      | Complement factor D                          | 5.16  | 0.0249   | 0.2554              | ↑                   | 1.12                         |

|        |                                              |      |        |        |   |      |
|--------|----------------------------------------------|------|--------|--------|---|------|
| P01615 | Immunoglobulin kappa variable 2D-28          | 5.10 | 0.0258 | 0.2554 | ↓ | 0.84 |
| P02671 | Fibrinogen alpha chain                       | 5.05 | 0.0266 | 0.2554 | ↓ | 0.89 |
| P23142 | Fibulin-1                                    | 4.99 | 0.0275 | 0.2554 | ↑ | 1.36 |
| P01834 | Immunoglobulin kappa constant                | 4.95 | 0.0280 | 0.2554 | ↓ | 0.90 |
| P24592 | Insulin-like growth factor-binding protein 6 | 4.85 | 0.0297 | 0.2554 | ↑ | 1.15 |
| P02679 | Fibrinogen gamma chain                       | 4.77 | 0.0310 | 0.2554 | ↓ | 0.89 |
| P02675 | Fibrinogen beta chain                        | 4.76 | 0.0311 | 0.2554 | ↓ | 0.90 |
| P03951 | Coagulation factor XI                        | 4.72 | 0.0318 | 0.2554 | ↓ | 0.91 |
| P80748 | Immunoglobulin lambda variable 3-21          | 4.63 | 0.0334 | 0.2603 | ↓ | 0.85 |
| P55290 | Cadherin-13                                  | 4.43 | 0.0374 | 0.2832 | ↓ | 0.88 |
| P02652 | Apolipoprotein A-II                          | 4.37 | 0.0388 | 0.2856 | ↓ | 0.85 |
| P07358 | Complement component C8 beta chain           | 4.12 | 0.0446 | 0.3061 | ↑ | 1.08 |
| D6RAR4 | Hepatocyte growth factor activator           | 4.11 | 0.0450 | 0.3061 | ↓ | 0.89 |
| P15144 | Aminopeptidase N                             | 4.07 | 0.0460 | 0.3061 | ↑ | 1.06 |
| Q99878 | Histone H2A type 1-J                         | 4.06 | 0.0462 | 0.3061 | ↑ | 1.37 |
| P08294 | Extracellular superoxide dismutase [Cu-Zn]   | 3.91 | 0.0505 | 0.3264 | ↑ | 1.13 |
| P02750 | Leucine-rich alpha-2-glycoprotein            | 3.83 | 0.0528 | 0.3331 | ↓ | 0.92 |
| P61626 | Lysozyme C                                   | 3.61 | 0.0600 | 0.3686 | ↓ | 0.91 |
| P12111 | Collagen alpha-3                             | 3.55 | 0.0621 | 0.3686 | ↑ | 1.09 |
| P00915 | Carbonic anhydrase 1                         | 3.53 | 0.0626 | 0.3686 | ↑ | 1.24 |
| P14151 | L-selectin                                   | 3.35 | 0.0700 | 0.4033 | ↑ | 1.08 |
| O43866 | CD5 antigen-like                             | 3.26 | 0.0737 | 0.4155 | ↓ | 0.86 |
| P02654 | Apolipoprotein C-I                           | 3.14 | 0.0791 | 0.4220 | ↓ | 0.91 |
| P01024 | Complement C3                                | 3.09 | 0.0814 | 0.4220 | ↓ | 0.94 |
| P29622 | Kallistatin                                  | 3.08 | 0.0820 | 0.4220 | ↑ | 1.11 |
| P02647 | Apolipoprotein A-I                           | 3.07 | 0.0823 | 0.4220 | ↓ | 0.86 |
| Q14624 | Inter-alpha-trypsin inhibitor heavy chain H4 | 3.06 | 0.0828 | 0.4220 | ↓ | 0.91 |
| O00187 | Mannan-binding lectin serine protease 2      | 2.92 | 0.0901 | 0.4404 | ↑ | 1.07 |
| P16403 | Histone H1.2                                 | 2.91 | 0.0907 | 0.4404 | ↑ | 1.19 |
| P06276 | Cholinesterase                               | 2.90 | 0.0914 | 0.4404 | ↑ | 1.03 |

|        |                                                                        |      |        |        |   |      |
|--------|------------------------------------------------------------------------|------|--------|--------|---|------|
| Q9NQ79 | Cartilage acidic protein 1                                             | 2.84 | 0.0946 | 0.4435 | ↑ | 1.08 |
| Q9H4A9 | Dipeptidase 2                                                          | 2.83 | 0.0954 | 0.4435 | ↓ | 0.84 |
| H0Y755 | Low affinity immunoglobulin gamma Fc region receptor III-A             | 2.74 | 0.1008 | 0.4606 | ↑ | 1.11 |
| Q9UBQ6 | Exostosin-like 2                                                       | 2.50 | 0.1164 | 0.5142 | ↑ | 1.08 |
| Q9UGM5 | Fetuin-B                                                               | 2.48 | 0.1178 | 0.5142 | ↓ | 0.94 |
| O75636 | Ficolin-3                                                              | 2.47 | 0.1191 | 0.5142 | ↑ | 1.07 |
| O95497 | Pantetheinase                                                          | 2.45 | 0.1203 | 0.5142 | ↑ | 1.15 |
| P43251 | Biotinidase                                                            | 2.38 | 0.1254 | 0.5220 | ↑ | 1.06 |
| Q08380 | Galectin-3-binding protein                                             | 2.36 | 0.1276 | 0.5220 | ↑ | 1.08 |
| P63261 | Actin, cytoplasmic 2                                                   | 2.34 | 0.1289 | 0.5220 | ↑ | 1.10 |
| Q9Y5Y7 | Lymphatic vessel endothelial hyaluronic acid receptor 1                | 2.33 | 0.1300 | 0.5220 | ↑ | 1.09 |
| P00747 | Plasminogen                                                            | 2.26 | 0.1358 | 0.5361 | ↑ | 1.07 |
| P22792 | Carboxypeptidase N subunit 2                                           | 2.21 | 0.1395 | 0.5361 | ↓ | 0.95 |
| P01033 | Metalloproteinase inhibitor 1                                          | 2.21 | 0.1396 | 0.5361 | ↓ | 0.87 |
| Q9ULI3 | Protein HEG homolog 1                                                  | 2.11 | 0.1488 | 0.5633 | ↑ | 1.13 |
| Q96PD5 | N-acetylmuramoyl-L-alanine amidase                                     | 2.06 | 0.1539 | 0.5638 | ↑ | 1.09 |
| P05019 | Insulin-like growth factor I                                           | 2.06 | 0.1540 | 0.5638 | ↑ | 1.24 |
| P35858 | Insulin-like growth factor-binding protein complex acid labile subunit | 2.05 | 0.1553 | 0.5638 | ↑ | 1.10 |
| P02753 | Retinol-binding protein 4                                              | 2.01 | 0.1592 | 0.5701 | ↑ | 1.13 |
| P02452 | Collagen alpha-1 (I) chain                                             | 1.90 | 0.1706 | 0.5923 | ↑ | 1.18 |
| P39060 | Collagen alpha-1 (XVIII) chain                                         | 1.90 | 0.1707 | 0.5923 | ↑ | 1.06 |
| P02747 | Complement C1q subcomponent subunit C                                  | 1.89 | 0.1721 | 0.5923 | ↓ | 0.96 |
| P04004 | Vitronectin                                                            | 1.78 | 0.1853 | 0.6295 | ↑ | 1.06 |
| P07942 | Laminin subunit beta-1                                                 | 1.75 | 0.1887 | 0.6330 | ↑ | 1.01 |
| P02745 | Complement C1q subcomponent subunit A                                  | 1.70 | 0.1944 | 0.6440 | ↓ | 0.93 |
| P07359 | Platelet glycoprotein Ib alpha chain                                   | 1.65 | 0.2010 | 0.6535 | ↑ | 1.03 |
| P07737 | Profilin-1                                                             | 1.65 | 0.2022 | 0.6535 | ↑ | 1.17 |
| P00751 | Complement factor B                                                    | 1.58 | 0.2116 | 0.6756 | ↓ | 0.97 |

|        |                                                       |      |        |        |   |      |
|--------|-------------------------------------------------------|------|--------|--------|---|------|
| H0YD13 | CD44 antigen                                          | 1.53 | 0.2185 | 0.6818 | ↑ | 1.09 |
| P48740 | Mannan-binding lectin serine protease 1               | 1.53 | 0.2192 | 0.6818 | ↓ | 0.91 |
| P07357 | Complement component C8 alpha chain                   | 1.50 | 0.2227 | 0.6818 | ↑ | 1.05 |
| P08603 | Complement factor H                                   | 1.48 | 0.2263 | 0.6818 | ↑ | 1.04 |
| Q16706 | Alpha-mannosidase 2                                   | 1.48 | 0.2264 | 0.6818 | ↓ | 0.92 |
| P20851 | C4b-binding protein beta chain                        | 1.46 | 0.2290 | 0.6819 | ↓ | 0.89 |
| Q12913 | Receptor-type tyrosine-protein phosphatase eta        | 1.43 | 0.2341 | 0.6870 | ↓ | 0.93 |
| Q15582 | Transforming growth factor-beta-induced protein ig-h3 | 1.42 | 0.2359 | 0.6870 | ↑ | 1.04 |
| Q6UXB8 | Peptidase inhibitor 16                                | 1.39 | 0.2407 | 0.6933 | ↑ | 1.09 |
| P69905 | Hemoglobin subunit alpha                              | 1.31 | 0.2553 | 0.7051 | ↑ | 3.63 |
| F5GZZ9 | Scavenger receptor cysteine-rich type 1 protein M130  | 1.29 | 0.2586 | 0.7051 | ↑ | 1.20 |
| P13591 | Neural cell adhesion molecule 1                       | 1.27 | 0.2619 | 0.7051 | ↑ | 1.03 |
| Q15113 | Procollagen C-endopeptidase enhancer 1                | 1.26 | 0.2633 | 0.7051 | ↑ | 1.07 |
| P26927 | Hepatocyte growth factor-like protein                 | 1.24 | 0.2671 | 0.7051 | ↑ | 1.03 |
| Q12841 | Follistatin-related protein 1                         | 1.24 | 0.2675 | 0.7051 | ↑ | 1.04 |
| Q15848 | Adiponectin                                           | 1.24 | 0.2687 | 0.7051 | ↓ | 0.95 |
| P27487 | Dipeptidyl peptidase 4                                | 1.23 | 0.2706 | 0.7051 | ↑ | 1.06 |
| Q86U17 | Serpin A11                                            | 1.22 | 0.2711 | 0.7051 | ↑ | 1.11 |
| Q9UNW1 | Multiple inositol polyphosphate phosphatase 1         | 1.22 | 0.2714 | 0.7051 | ↓ | 0.93 |
| P43652 | Afamin                                                | 1.20 | 0.2758 | 0.7096 | ↑ | 1.07 |
| P51884 | Lumican                                               | 1.18 | 0.2798 | 0.7130 | ↑ | 1.04 |
| P13671 | Complement component C6                               | 1.15 | 0.2868 | 0.7195 | ↓ | 0.99 |
| P04278 | Sex hormone-binding globulin                          | 1.14 | 0.2883 | 0.7195 | ↓ | 0.89 |
| P03950 | Angiogenin                                            | 1.13 | 0.2905 | 0.7195 | ↓ | 0.96 |
| E9PBC5 | Plasma kallikrein                                     | 1.10 | 0.2973 | 0.7295 | ↓ | 0.96 |
| P04275 | von Willebrand factor                                 | 1.07 | 0.3030 | 0.7309 | ↓ | 0.93 |
| P02748 | Complement component C9                               | 1.07 | 0.3034 | 0.7309 | ↓ | 0.97 |
| P08185 | Corticosteroid-binding globulin                       | 1.02 | 0.3139 | 0.7494 | ↑ | 1.02 |
| P14625 | Endoplasmin                                           | 1.00 | 0.3189 | 0.7545 | ↑ | 1.05 |
| O75882 | Attractin                                             | 0.97 | 0.3256 | 0.7636 | ↑ | 1.02 |

|        |                                                           |      |        |        |   |      |
|--------|-----------------------------------------------------------|------|--------|--------|---|------|
| P68871 | Hemoglobin subunit beta                                   | 0.96 | 0.3300 | 0.7671 | ↑ | 2.75 |
| P11021 | Endoplasmic reticulum chaperone BiP                       | 0.94 | 0.3342 | 0.7701 | ↓ | 0.96 |
| P02787 | Serotransferrin                                           | 0.90 | 0.3459 | 0.7862 | ↓ | 0.97 |
| P18206 | Vinculin                                                  | 0.89 | 0.3471 | 0.7862 | ↑ | 1.08 |
| Q5T7F0 | Neuropilin                                                | 0.87 | 0.3521 | 0.7907 | ↓ | 0.96 |
| P07360 | Complement component C8 gamma chain                       | 0.83 | 0.3655 | 0.8139 | ↑ | 1.04 |
| P55058 | Phospholipid transfer protein                             | 0.78 | 0.3783 | 0.8265 | ↑ | 1.05 |
| P01765 | Immunoglobulin heavy variable 3-23                        | 0.77 | 0.3806 | 0.8265 | ↓ | 0.89 |
| P13727 | Bone marrow proteoglycan                                  | 0.74 | 0.3900 | 0.8265 | ↑ | 1.09 |
| P12259 | Coagulation factor V                                      | 0.73 | 0.3962 | 0.8265 | ↓ | 0.97 |
| P00742 | Coagulation factor X                                      | 0.72 | 0.3970 | 0.8265 | ↑ | 1.03 |
| P18065 | Insulin-like growth factor-binding protein 2              | 0.70 | 0.4043 | 0.8265 | ↓ | 0.92 |
| P54289 | Voltage-dependent calcium channel subunit alpha-2/delta-1 | 0.70 | 0.4060 | 0.8265 | ↑ | 1.03 |
| P13473 | Lysosome-associated membrane glycoprotein 2               | 0.70 | 0.4061 | 0.8265 | ↓ | 0.92 |
| P32119 | Peroxiredoxin-2                                           | 0.69 | 0.4084 | 0.8265 | ↑ | 1.02 |
| P04196 | Histidine-rich glycoprotein                               | 0.69 | 0.4087 | 0.8265 | ↑ | 1.05 |
| P02649 | Apolipoprotein E                                          | 0.69 | 0.4092 | 0.8265 | ↓ | 0.96 |
| P02749 | Beta-2-glycoprotein 1                                     | 0.68 | 0.4107 | 0.8265 | ↓ | 0.98 |
| P02655 | Apolipoprotein C-II                                       | 0.68 | 0.4117 | 0.8265 | ↑ | 1.06 |
| P00734 | Prothrombin                                               | 0.65 | 0.4218 | 0.8404 | ↓ | 0.97 |
| Q9UNN8 | Endothelial protein C receptor                            | 0.64 | 0.4267 | 0.8438 | ↑ | 1.10 |
| P02743 | Serum amyloid P-component                                 | 0.62 | 0.4319 | 0.8478 | ↓ | 0.98 |
| P08709 | Coagulation factor VII                                    | 0.59 | 0.4429 | 0.8591 | ↑ | 1.02 |
| P02746 | Complement C1q subcomponent subunit B                     | 0.59 | 0.4448 | 0.8591 | ↑ | 1.05 |
| P04180 | Phosphatidylcholine-sterol acyltransferase                | 0.58 | 0.4474 | 0.8591 | ↓ | 0.95 |
| P24821 | Tenascin                                                  | 0.55 | 0.4606 | 0.8756 | ↑ | 1.05 |
| P01042 | Kininogen-1                                               | 0.54 | 0.4626 | 0.8756 | ↓ | 0.98 |
| P23470 | Receptor-type tyrosine-protein phosphatase gamma          | 0.53 | 0.4680 | 0.8791 | ↓ | 1.00 |
| P07195 | L-lactate dehydrogenase B chain                           | 0.52 | 0.4712 | 0.8791 | ↓ | 0.95 |

|        |                                                                   |      |        |        |   |      |
|--------|-------------------------------------------------------------------|------|--------|--------|---|------|
| Q13822 | Ectonucleotide pyrophosphatase/ phosphodiesterase family member 2 | 0.51 | 0.4744 | 0.8791 | ↑ | 1.02 |
| P49908 | Selenoprotein P                                                   | 0.50 | 0.4810 | 0.8852 | ↓ | 1.00 |
| P04114 | Apolipoprotein B-100                                              | 0.49 | 0.4845 | 0.8855 | ↓ | 0.99 |
| P02766 | Transthyretin                                                     | 0.47 | 0.4941 | 0.8909 | ↓ | 0.95 |
| P27918 | Properdin                                                         | 0.47 | 0.4942 | 0.8909 | ↑ | 1.05 |
| H0Y897 | Target of Nesh-SH3                                                | 0.44 | 0.5101 | 0.9024 | ↑ | 1.06 |
| P01344 | Insulin-like growth factor II                                     | 0.44 | 0.5104 | 0.9024 | ↓ | 0.97 |
| P01031 | Complement C5                                                     | 0.42 | 0.5163 | 0.9024 | ↑ | 1.01 |
| P02776 | Platelet factor 4                                                 | 0.41 | 0.5214 | 0.9024 | ↓ | 0.94 |
| P06727 | Apolipoprotein A-IV                                               | 0.41 | 0.5222 | 0.9024 | ↑ | 1.01 |
| P05155 | Plasma protease C1 inhibitor                                      | 0.41 | 0.5226 | 0.9024 | ↓ | 0.96 |
| P15169 | Carboxypeptidase N catalytic chain                                | 0.41 | 0.5251 | 0.9024 | ↓ | 0.97 |
| Q9BXR6 | Complement factor H-related protein 5                             | 0.39 | 0.5319 | 0.9024 | ↓ | 1.00 |
| P02656 | Apolipoprotein C-III                                              | 0.39 | 0.5337 | 0.9024 | ↓ | 0.95 |
| Q16270 | Insulin-like growth factor-binding protein 7                      | 0.39 | 0.5361 | 0.9024 | ↓ | 0.96 |
| O95445 | Apolipoprotein M                                                  | 0.37 | 0.5426 | 0.9024 | ↓ | 0.98 |
| P00488 | Coagulation factor XIII A chain                                   | 0.37 | 0.5441 | 0.9024 | ↑ | 1.01 |
| Q76LX8 | A disintegrin and metalloproteinase with thrombospondin motifs 13 | 0.36 | 0.5492 | 0.9024 | ↓ | 0.97 |
| Q8IUL8 | Cartilage intermediate layer protein 2                            | 0.35 | 0.5553 | 0.9024 | ↑ | 1.07 |
| P61769 | Beta-2-microglobulin                                              | 0.34 | 0.5628 | 0.9024 | ↑ | 1.05 |
| Q99983 | Osteomodulin                                                      | 0.33 | 0.5661 | 0.9024 | ↑ | 1.04 |
| P54802 | Alpha-N-acetylglucosaminidase                                     | 0.32 | 0.5723 | 0.9024 | ↑ | 1.11 |
| P11226 | Mannose-binding protein C                                         | 0.32 | 0.5724 | 0.9024 | ↓ | 0.98 |
| P05543 | Thyroxine-binding globulin                                        | 0.32 | 0.5731 | 0.9024 | ↓ | 0.99 |
| P10721 | Mast/stem cell growth factor receptor Kit                         | 0.32 | 0.5743 | 0.9024 | ↑ | 1.01 |
| Q14520 | Hyaluronan-binding protein 2                                      | 0.31 | 0.5759 | 0.9024 | ↓ | 0.98 |
| P01861 | Immunoglobulin heavy constant gamma 4                             | 0.31 | 0.5783 | 0.9024 | ↓ | 0.82 |
| P00748 | Coagulation factor XII                                            | 0.31 | 0.5789 | 0.9024 | ↓ | 0.98 |
| P09172 | Dopamine beta-hydroxylase                                         | 0.29 | 0.5883 | 0.9081 | ↓ | 0.97 |



|        |                                               |      |        |        |   |      |
|--------|-----------------------------------------------|------|--------|--------|---|------|
| Q16610 | Extracellular matrix protein 1                | 0.29 | 0.5894 | 0.9081 | ↓ | 0.98 |
| P36980 | Complement factor H-related protein 2         | 0.28 | 0.5952 | 0.9084 | ↓ | 0.91 |
| Q9UHG3 | Preylcysteine oxidase 1                       | 0.28 | 0.5982 | 0.9084 | ↑ | 1.02 |
| P01008 | Antithrombin-III                              | 0.28 | 0.5999 | 0.9084 | ↓ | 0.98 |
| P01009 | Alpha-1-antitrypsin                           | 0.24 | 0.6231 | 0.9357 | ↓ | 0.99 |
| P33151 | Cadherin-5                                    | 0.24 | 0.6250 | 0.9357 | ↓ | 0.96 |
| P17936 | Insulin-like growth factor-binding protein 3  | 0.23 | 0.6329 | 0.9416 | ↑ | 1.06 |
| P01876 | Immunoglobulin heavy constant alpha 1         | 0.23 | 0.6360 | 0.9416 | ↓ | 0.96 |
| P22352 | Glutathione peroxidase 3                      | 0.22 | 0.6413 | 0.9439 | ↓ | 1.00 |
| P01034 | Cystatin-C                                    | 0.21 | 0.6447 | 0.9439 | ↑ | 1.03 |
| P28827 | Receptor-type tyrosine-protein phosphatase mu | 0.20 | 0.6555 | 0.9504 | ↓ | 0.98 |
| P36955 | Pigment epithelium-derived factor             | 0.20 | 0.6563 | 0.9504 | ↓ | 1.00 |
| P59666 | Neutrophil defensin 3                         | 0.19 | 0.6605 | 0.9513 | ↓ | 0.99 |
| P18428 | Lipopolysaccharide-binding protein            | 0.18 | 0.6698 | 0.9594 | ↑ | 1.05 |
| P43121 | Cell surface glycoprotein MUC18               | 0.17 | 0.6784 | 0.9665 | ↓ | 0.98 |
| P19652 | Alpha-1-acid glycoprotein 2                   | 0.15 | 0.7034 | 0.9799 | ↑ | 1.13 |
| P04075 | Fructose-bisphosphate aldolase A              | 0.14 | 0.7057 | 0.9799 | ↓ | 0.97 |
| Q6EMK4 | Vasorin                                       | 0.14 | 0.7064 | 0.9799 | ↓ | 0.99 |
| Q14515 | SPARC-like protein 1                          | 0.14 | 0.7085 | 0.9799 | ↑ | 1.05 |
| P05109 | Protein S100-A8                               | 0.14 | 0.7099 | 0.9799 | ↑ | 1.01 |
| P05546 | Heparin cofactor 2                            | 0.14 | 0.7100 | 0.9799 | ↑ | 1.03 |
| P49747 | Cartilage oligomeric matrix protein           | 0.13 | 0.7175 | 0.9812 | ↓ | 1.00 |
| Q9NPY3 | Complement component C1q receptor             | 0.13 | 0.7183 | 0.9812 | ↑ | 1.01 |
| Q9Y4L1 | Hypoxia up-regulated protein 1                | 0.12 | 0.7318 | 0.9927 | ↑ | 1.02 |
| P02774 | Vitamin D-binding protein                     | 0.11 | 0.7460 | 0.9927 | ↓ | 0.97 |
| P00736 | Complement C1r subcomponent                   | 0.10 | 0.7467 | 0.9927 | ↓ | 0.99 |
| P19827 | Inter-alpha-trypsin inhibitor heavy chain H1  | 0.10 | 0.7490 | 0.9927 | ↓ | 0.98 |
| P06702 | Protein S100-A9                               | 0.10 | 0.7506 | 0.9927 | ↓ | 1.00 |
| O00391 | Sulfhydryl oxidase 1                          | 0.10 | 0.7547 | 0.9927 | ↑ | 1.01 |
| Q92820 | Gamma-glutamyl hydrolase                      | 0.09 | 0.7590 | 0.9927 | ↑ | 1.03 |

|        |                                                      |      |        |        |   |      |
|--------|------------------------------------------------------|------|--------|--------|---|------|
| P80108 | Phosphatidylinositol-glycan-specific phospholipase D | 0.09 | 0.7649 | 0.9927 | ↑ | 1.01 |
| Q9NPH3 | Interleukin-1 receptor accessory protein             | 0.09 | 0.7649 | 0.9927 | ↑ | 1.06 |
| P01011 | Alpha-1-antichymotrypsin                             | 0.08 | 0.7712 | 0.9927 | ↓ | 0.98 |
| P35542 | Serum amyloid A-4 protein                            | 0.08 | 0.7743 | 0.9927 | ↑ | 1.03 |
| P02763 | Alpha-1-acid glycoprotein 1                          | 0.08 | 0.7752 | 0.9927 | ↓ | 0.90 |
| P20742 | Pregnancy zone protein                               | 0.08 | 0.7787 | 0.9927 | ↑ | 1.05 |
| P02775 | Platelet basic protein                               | 0.08 | 0.7815 | 0.9927 | ↓ | 0.99 |
| O95479 | GDH/6PGL endoplasmic bifunctional protein            | 0.08 | 0.7835 | 0.9927 | ↓ | 0.99 |
| P05362 | Intercellular adhesion molecule 1                    | 0.07 | 0.7875 | 0.9927 | ↓ | 0.95 |
| O14791 | Apolipoprotein L1                                    | 0.07 | 0.7904 | 0.9927 | ↑ | 1.06 |
| P33908 | Mannosyl-oligosaccharide 1,2-alpha-mannosidase IA    | 0.07 | 0.7947 | 0.9934 | ↓ | 0.98 |
| P22891 | Vitamin K-dependent protein Z                        | 0.06 | 0.8010 | 0.9934 | ↓ | 0.91 |
| Q13740 | CD166 antigen                                        | 0.06 | 0.8022 | 0.9934 | ↓ | 0.97 |
| P22105 | Tenascin-X                                           | 0.05 | 0.8160 | 0.9976 | ↓ | 1.00 |
| P05156 | Complement factor I                                  | 0.05 | 0.8205 | 0.9976 | ↑ | 1.01 |
| Q96KN2 | Beta-Ala-His dipeptidase                             | 0.05 | 0.8245 | 0.9976 | ↑ | 1.03 |
| P10643 | Complement component C7                              | 0.04 | 0.8343 | 0.9976 | ↓ | 1.00 |
| O00533 | Neural cell adhesion molecule L1-like protein        | 0.04 | 0.8359 | 0.9976 | ↓ | 0.97 |
| Q9BWP8 | Collectin-11                                         | 0.04 | 0.8409 | 0.9976 | ↓ | 0.98 |
| Q99969 | Retinoic acid receptor responder protein 2           | 0.04 | 0.8425 | 0.9976 | ↓ | 0.99 |
| P04070 | Vitamin K-dependent protein C                        | 0.04 | 0.8443 | 0.9976 | ↑ | 1.02 |
| P04066 | Tissue alpha-L-fucosidase                            | 0.04 | 0.8513 | 0.9976 | ↓ | 0.94 |
| P55056 | Apolipoprotein C-IV                                  | 0.03 | 0.8585 | 0.9976 | ↑ | 1.12 |
| P0C0L5 | Complement C4-B                                      | 0.03 | 0.8646 | 0.9976 | ↓ | 0.99 |
| P00450 | Ceruloplasmin                                        | 0.03 | 0.8653 | 0.9976 | ↓ | 0.99 |
| P02760 | Protein AMBP                                         | 0.03 | 0.8721 | 0.9976 | ↓ | 1.00 |
| P19320 | Vascular cell adhesion protein 1                     | 0.02 | 0.8840 | 0.9976 | ↓ | 0.98 |
| P22692 | Insulin-like growth factor-binding protein 4         | 0.02 | 0.8848 | 0.9976 | ↓ | 0.59 |
| P02751 | Fibronectin                                          | 0.02 | 0.8998 | 0.9976 | ↓ | 0.97 |
| P08519 | Apolipoprotein                                       | 0.01 | 0.9049 | 0.9976 | ↑ | 1.20 |

|        |                                                                      |      |        |        |   |      |
|--------|----------------------------------------------------------------------|------|--------|--------|---|------|
| P12830 | Cadherin-1                                                           | 0.01 | 0.9146 | 0.9976 | ↓ | 0.94 |
| Q96IY4 | Carboxypeptidase B2                                                  | 0.01 | 0.9190 | 0.9976 | ↑ | 1.01 |
| P17813 | Endoglin                                                             | 0.01 | 0.9194 | 0.9976 | ↓ | 0.97 |
| P35443 | Thrombospondin-4                                                     | 0.01 | 0.9285 | 0.9976 | ↑ | 1.11 |
| P98160 | Basement membrane-specific heparan sulfate proteoglycan core protein | 0.01 | 0.9306 | 0.9976 | ↓ | 0.98 |
| P00738 | Haptoglobin                                                          | 0.01 | 0.9311 | 0.9976 | ↓ | 0.98 |
| P19823 | Inter-alpha-trypsin inhibitor heavy chain H2                         | 0.01 | 0.9331 | 0.9976 | ↓ | 1.00 |
| P02790 | Hemopexin                                                            | 0.01 | 0.9342 | 0.9976 | ↓ | 1.00 |
| Q06033 | Inter-alpha-trypsin inhibitor heavy chain H3                         | 0.01 | 0.9358 | 0.9976 | ↓ | 0.97 |
| Q07954 | Prolow-density lipoprotein receptor-related protein 1                | 0.01 | 0.9388 | 0.9976 | ↓ | 0.98 |
| P0C0L4 | Complement C4-A                                                      | 0.01 | 0.9390 | 0.9976 | ↑ | 1.03 |
| P00740 | Coagulation factor IX                                                | 0.00 | 0.9441 | 0.9976 | ↑ | 1.01 |
| P07333 | Macrophage colony-stimulating factor 1 receptor                      | 0.00 | 0.9442 | 0.9976 | ↓ | 0.98 |
| Q92954 | Proteoglycan 4                                                       | 0.00 | 0.9448 | 0.9976 | ↑ | 1.01 |
| Q6YHK3 | CD109 antigen                                                        | 0.00 | 0.9453 | 0.9976 | ↓ | 0.97 |
| Q99784 | Noelin                                                               | 0.00 | 0.9490 | 0.9976 | ↓ | 1.00 |
| Q01459 | Di-N-acetylchitobiase                                                | 0.00 | 0.9502 | 0.9976 | ↓ | 0.99 |
| Q9Y6R7 | IgGFc-binding protein                                                | 0.00 | 0.9507 | 0.9976 | ↑ | 1.06 |
| Q9NZP8 | Complement C1r subcomponent-like protein                             | 0.00 | 0.9535 | 0.9976 | ↑ | 1.01 |
| P04217 | Alpha-1B-glycoprotein                                                | 0.00 | 0.9550 | 0.9976 | ↓ | 1.00 |
| K7EMN2 | 6-phosphogluconate dehydrogenase, decarboxylating                    | 0.00 | 0.9590 | 0.9976 | ↓ | 0.95 |
| G3V2W1 | Protein Z-dependent protease inhibitor                               | 0.00 | 0.9607 | 0.9976 | ↓ | 1.00 |
| P12955 | Xaa-Pro dipeptidase                                                  | 0.00 | 0.9610 | 0.9976 | ↓ | 0.94 |
| P06681 | Complement C2                                                        | 0.00 | 0.9688 | 0.9976 | ↑ | 1.02 |
| B7ZKJ8 | ITIH4 protein                                                        | 0.00 | 0.9701 | 0.9976 | ↓ | 0.99 |
| P05154 | Plasma serine protease inhibitor                                     | 0.00 | 0.9707 | 0.9976 | ↓ | 1.00 |
| P13796 | Plastin-2                                                            | 0.00 | 0.9799 | 0.9976 | ↓ | 0.98 |
| P09486 | SPARC                                                                | 0.00 | 0.9809 | 0.9976 | ↓ | 0.95 |
| P02765 | Alpha-2-HS-glycoprotein                                              | 0.00 | 0.9812 | 0.9976 | ↑ | 1.01 |

|        |                                                   |      |        |        |   |      |
|--------|---------------------------------------------------|------|--------|--------|---|------|
| P05160 | Coagulation factor XIII B chain                   | 0.00 | 0.9826 | 0.9976 | ↓ | 1.00 |
| P54108 | Cysteine-rich secretory protein 3                 | 0.00 | 0.9883 | 0.9976 | ↓ | 0.98 |
| Q16853 | Membrane primary amine oxidase                    | 0.00 | 0.9943 | 0.9976 | ↓ | 0.98 |
| P05090 | Apolipoprotein D                                  | 0.00 | 0.9949 | 0.9976 | ↓ | 0.92 |
| Q10588 | ADP-ribosyl cyclase/cyclic ADP-ribose hydrolase 2 | 0.00 | 0.9976 | 0.9976 | ↓ | 0.97 |

PEs: psychotic experiences; FDR: false discovery rate; ALSPAC: Avon Longitudinal Study of Parents and Children

**eTable 16: Ten percent highest-weighted features for Model S2 (support vector machine model predicting functional outcome at 24 months in EU-GEI)**

| <b>Feature</b>                                      | <b>Mean weight</b> |
|-----------------------------------------------------|--------------------|
| BPRS: suspiciousness                                | 0.197              |
| P01023 Alpha-2-macroglobulin                        | -0.191             |
| P55058 Phospholipid transfer protein                | -0.186             |
| P01871 Immunoglobulin heavy constant mu             | -0.182             |
| Q9UGM5 Fetuin-B                                     | 0.148              |
| O43866 CD5 antigen-like                             | -0.145             |
| P14618 Pyruvate kinase                              | -0.133             |
| P19827 Inter-alpha-trypsin inhibitor heavy chain H1 | 0.129              |
| SANS: blocking                                      | 0.118              |
| SANS: increased latency of response                 | 0.111              |
| P10909 Clusterin                                    | 0.107              |
| P08603 Complement factor H                          | 0.104              |
| P36955 Pigment epithelium-derived factor            | 0.103              |
| MADRS: suicidal thoughts                            | -0.103             |
| Impersistence at work or school                     | 0.102              |
| P17936 Insulin-like growth factor-binding protein 3 | 0.102              |
| Age                                                 | -0.101             |
| P04196 Histidine-rich glycoprotein                  | 0.099              |
| Q08380 Galectin-3-binding protein                   | 0.097              |
| SANS: grooming and hygiene                          | 0.097              |
| SANS: ability to feel intimacy and closeness        | 0.095              |
| SANS: sexual activity                               | -0.093             |

|                                  |       |
|----------------------------------|-------|
| P11226 Mannose-binding protein C | 0.090 |
|----------------------------------|-------|

Features are ranked according to mean feature weight for models selected in the cross-validation inner loop.

EU-GEI: European Network of National Schizophrenia Networks Studying Gene-Environment Interactions; BPRS: Brief Psychiatric Rating Scale; SANS: Scale for Assessment of Negative Symptoms; MADRS: Montgomery-Asberg Depression Rating Scale

**eTable 17: Table comparing performance metrics for multi-class site prediction models based on 69 clinical features from Model 1b**

| Multiclass prediction         | TP, n | FN, n | TN, n | FP, n | Sens., % | Spec., % | Balanced accuracy, % | AUC (95% confidence interval) | PPV, % | NPV, % | LR+ | LR- |
|-------------------------------|-------|-------|-------|-------|----------|----------|----------------------|-------------------------------|--------|--------|-----|-----|
| London vs. REST               | 42    | 11    | 58    | 22    | 79.2     | 72.5     | 75.9                 | 0.76<br>(0.67 – 0.85)         | 65.6   | 84.1   | 2.9 | 0.3 |
| Netherlands vs. REST          | 12    | 3     | 85    | 33    | 80.0     | 72.0     | 76.0                 | 0.76<br>(0.61 – 0.91)         | 26.7   | 96.6   | 2.9 | 0.3 |
| Melbourne vs. REST            | 1     | 13    | 103   | 16    | 7.1      | 86.6     | 46.8                 | 0.47<br>(0.31 – 0.63)         | 5.9    | 88.8   | 0.5 | 1.1 |
| Switzerland/ Austria vs. REST | 1     | 13    | 116   | 3     | 7.1      | 97.5     | 52.3                 | 0.52<br>(0.36 – 0.68)         | 25.0   | 89.9   | 2.8 | 1.0 |
| Denmark/ France vs. REST      | 3     | 21    | 109   | 0     | 12.5     | 100.0    | 56.3                 | 0.56<br>(0.43 – 0.69)         | 100.0  | 83.8   | N/A | 0.9 |
| Spain/ Brazil vs. REST        | 0     | 13    | 120   | 0     | 0.0      | 100.0    | 50.0                 | 0.50<br>(0.33 – 0.67)         | N/A    | 90.2   | N/A | 1.0 |

TP: true positives; FN: false negatives; TN: true negatives; FP: false positives; Sens.: sensitivity; Spec.: specificity; AUC: area under the receiver-operating curve; PPV: positive predictive value; NPV: negative predictive value; LR+: positive likelihood ratio; LR-: negative likelihood ratio; N/A: not applicable

**eTable 18: Table comparing performance metrics for multi-class site prediction models based on 166 proteomic features from Model 1c**

| Multiclass prediction         | TP, n | FN, n | TN, n | FP, n | Sens., % | Spec., % | Balanced accuracy, % | AUC (95% confidence interval) | PPV, % | NPV, % | LR+ | LR- |
|-------------------------------|-------|-------|-------|-------|----------|----------|----------------------|-------------------------------|--------|--------|-----|-----|
| London vs. REST               | 37    | 16    | 42    | 38    | 69.8     | 52.5     | 61.2                 | 0.61<br>(0.51 – 0.71)         | 49.3   | 72.4   | 1.5 | 0.6 |
| Netherlands vs. REST          | 8     | 7     | 77    | 41    | 53.3     | 65.3     | 59.3                 | 0.59<br>(0.43 – 0.75)         | 16.3   | 91.7   | 1.5 | 0.7 |
| Melbourne vs. REST            | 0     | 14    | 112   | 7     | 0.0      | 94.1     | 47.1                 | 0.47<br>(0.31 – 0.63)         | 0.0    | 88.9   | 0.0 | 1.1 |
| Switzerland/ Austria vs. REST | 1     | 13    | 118   | 1     | 7.1      | 99.2     | 53.2                 | 0.53<br>(0.37 – 0.69)         | 50.0   | 90.1   | 8.5 | 0.9 |
| Denmark/ France vs. REST      | 0     | 24    | 109   | 0     | 0.0      | 100.0    | 50.0                 | 0.50<br>(0.37 – 0.63)         | N/A    | 82.0   | N/A | 1.0 |
| Spain/ Brazil vs. REST        | 0     | 13    | 120   | 0     | 0.0      | 100.0    | 50.0                 | 0.50<br>(0.33 – 0.67)         | N/A    | 90.2   | N/A | 1.0 |

TP: true positives; FN: false negatives; TN: true negatives; FP: false positives; Sens.: sensitivity; Spec.: specificity; AUC: area under the receiver-operating curve; PPV: positive predictive value; NPV: negative predictive value; LR+: positive likelihood ratio; LR-: negative likelihood ratio; N/A: not applicable



**eTable 19: Comparison of performance metrics for uncorrected vs. corrected support vector machine models**

|                                                       | Model 1a: clinical and proteomic (EU-GEI initial, all sites) |                       | Model 1b: clinical (EU-GEI initial, all sites) |                       | Model 1c: proteomic (EU-GEI initial, all sites) |                       | Model 2a: proteomic, non-London (EU-GEI initial, all sites except London) |                       | Model 2b: top 10, training (EU-GEI initial, all sites except London) |                       |
|-------------------------------------------------------|--------------------------------------------------------------|-----------------------|------------------------------------------------|-----------------------|-------------------------------------------------|-----------------------|---------------------------------------------------------------------------|-----------------------|----------------------------------------------------------------------|-----------------------|
|                                                       | Uncorrected                                                  | Corrected             | Uncorrected                                    | Corrected             | Uncorrected                                     | Corrected             | Uncorrected                                                               | Corrected             | Uncorrected                                                          | Corrected             |
| <b>True positives, n (%)</b>                          | 48 (98%)                                                     | 40 (82%)              | 23 (47%)                                       | 29 (59%)              | 49 (100%)                                       | 43 (88%)              | 28 (93%)                                                                  | 26 (87%)              | 30 (100%)                                                            | 23 (77%)              |
| <b>False negatives, n (%)</b>                         | 1 (2%)                                                       | 9 (18%)               | 26 (53%)                                       | 20 (41%)              | 0 (0%)                                          | 6 (12%)               | 2 (7%)                                                                    | 4 (13%)               | 0 (0%)                                                               | 7 (23%)               |
| <b>True negatives, n (%)</b>                          | 68 (81%)                                                     | 71 (85%)              | 45 (54%)                                       | 47 (56%)              | 71 (85%)                                        | 71 (85%)              | 40 (80%)                                                                  | 42 (84%)              | 41 (82%)                                                             | 44 (88%)              |
| <b>False positives, n (%)</b>                         | 16 (19%)                                                     | 13 (15%)              | 39 (46%)                                       | 37 (44%)              | 13 (15%)                                        | 13 (15%)              | 10 (20%)                                                                  | 8 (16%)               | 9 (18%)                                                              | 6 (12%)               |
| <b>Sensitivity, %</b>                                 | 98.0                                                         | 81.6                  | 46.9                                           | 59.2                  | 100.0                                           | 87.8                  | 93.3                                                                      | 86.7                  | 100.0                                                                | 76.7                  |
| <b>Specificity, %</b>                                 | 81.0                                                         | 84.5                  | 53.6                                           | 56.0                  | 84.5                                            | 84.5                  | 80.0                                                                      | 84.0                  | 82.0                                                                 | 88.0                  |
| <b>Balanced accuracy, %</b>                           | 89.5                                                         | 83.1                  | 50.3                                           | 57.6                  | 92.3                                            | 86.1                  | 86.7                                                                      | 85.3                  | 91.0                                                                 | 82.3                  |
| <b>Area under the curve (95% confidence interval)</b> | 0.95<br>(0.91 – 0.99)                                        | 0.91<br>(0.85 – 0.97) | 0.48<br>(0.38 – 0.58)                          | 0.52<br>(0.42 – 0.62) | 0.96<br>(0.92 – 1.00)                           | 0.94<br>(0.89 – 0.99) | 0.94<br>(0.88 – 1.00)                                                     | 0.96<br>(0.91 – 1.00) | 0.99<br>(0.96 – 1.00)                                                | 0.91<br>(0.84 – 0.98) |
| <b>Positive predictive value, %</b>                   | 75.0                                                         | 75.5                  | 37.1                                           | 43.9                  | 79.0                                            | 76.8                  | 73.7                                                                      | 76.5                  | 76.9                                                                 | 79.3                  |
| <b>Negative predictive value, %</b>                   | 98.6                                                         | 88.8                  | 63.4                                           | 70.1                  | 100.0                                           | 92.2                  | 95.2                                                                      | 91.3                  | 100.0                                                                | 86.3                  |
| <b>Positive likelihood ratio</b>                      | 5.1                                                          | 5.3                   | 1.0                                            | 1.3                   | 6.5                                             | 5.7                   | 4.7                                                                       | 5.4                   | 5.6                                                                  | 6.4                   |
| <b>Negative likelihood ratio</b>                      | <0.1                                                         | 0.2                   | 1.0                                            | 0.7                   | <0.1                                            | 0.1                   | 0.1                                                                       | 0.2                   | <0.1                                                                 | 0.3                   |

eTable 19, Cont'd:

|                                                               | Model 3: replication<br>(EU-GEI replication,<br>all sites) |                       | Model 4: Psychotic<br>experiences<br>(ALSPAC) |                       | Model S1:<br>ELISA<br>(EU-GEI initial, all sites) |                       | Model S2:<br>functional outcome<br>(EU-GEI initial, all sites) |                       |
|---------------------------------------------------------------|------------------------------------------------------------|-----------------------|-----------------------------------------------|-----------------------|---------------------------------------------------|-----------------------|----------------------------------------------------------------|-----------------------|
|                                                               | Uncorrected                                                | Corrected             | Uncorrected                                   | Corrected             | Uncorrected                                       | Corrected             | Uncorrected                                                    | Corrected             |
| <b>True positives, n (%)</b>                                  | 48 (98%)                                                   | 46 (94%)              | 40 (73%)                                      | 29 (53%)              | 33 (75%)                                          | 29 (66%)              | 27 (57%)                                                       | 32 (68%)              |
| <b>False negatives, n (%)</b>                                 | 1 (2%)                                                     | 3 (6%)                | 15 (27%)                                      | 26 (47%)              | 11 (25%)                                          | 15 (34%)              | 20 (43%)                                                       | 15 (32%)              |
| <b>True negatives, n (%)</b>                                  | 77 (90%)                                                   | 79 (92%)              | 47 (71%)                                      | 39 (59%)              | 51 (62%)                                          | 54 (66%)              | 22 (69%)                                                       | 19 (59%)              |
| <b>False positives, n (%)</b>                                 | 9 (10%)                                                    | 7 (8%)                | 19 (29%)                                      | 27 (41%)              | 31 (38%)                                          | 28 (34%)              | 10 (31%)                                                       | 13 (41%)              |
| <b>Sensitivity, %</b>                                         | 98.0                                                       | 93.9                  | 72.7                                          | 52.7                  | 75.0                                              | 65.9                  | 57.4                                                           | 68.1                  |
| <b>Specificity, %</b>                                         | 89.5                                                       | 91.9                  | 71.2                                          | 59.1                  | 62.2                                              | 65.9                  | 68.8                                                           | 59.4                  |
| <b>Balanced accuracy, %</b>                                   | 93.7                                                       | 92.9                  | 72.0                                          | 55.9                  | 68.6                                              | 65.9                  | 63.1                                                           | 63.7                  |
| <b>Area under the curve<br/>(95% confidence<br/>interval)</b> | 0.98<br>(0.95 – 1.00)                                      | 0.97<br>(0.94 – 1.00) | 0.74<br>(0.65 – 0.83)                         | 0.64<br>(0.54 – 0.74) | 0.76<br>(0.67 – 0.85)                             | 0.68<br>(0.58 – 0.78) | 0.74<br>(0.63 – 0.85)                                          | 0.71<br>(0.60 – 0.82) |
| <b>Positive predictive<br/>value, %</b>                       | 84.2                                                       | 86.8                  | 67.8                                          | 51.8                  | 51.6                                              | 50.9                  | 73.0                                                           | 71.1                  |
| <b>Negative predictive<br/>value, %</b>                       | 98.7                                                       | 96.3                  | 75.8                                          | 60.0                  | 82.3                                              | 78.3                  | 52.4                                                           | 55.9                  |
| <b>Positive likelihood<br/>ratio</b>                          | 9.4                                                        | 11.5                  | 2.5                                           | 1.3                   | 2.0                                               | 1.9                   | 1.8                                                            | 1.7                   |
| <b>Negative likelihood<br/>ratio</b>                          | <0.1                                                       | 0.1                   | 0.4                                           | 0.8                   | 0.4                                               | 0.5                   | 0.6                                                            | 0.5                   |

EU-GEI: European Network of National Schizophrenia Networks studying Gene-Environment Interactions; ALSPAC: Avon Longitudinal Study of Parents and Children; ELISA: enzyme-linked immunosorbent assay

**eTable 20: Proteins differentially expressed in CHR-T vs. CHR-NT on ANCOVA ( $p < 0.05$ ) in EU-GEI baseline plasma samples in the initial and replication experiment and predicted systemic impact on coagulation and complement activation and regulation**

| Pathway                      | CHR-T vs. CHR-NT, initial experiment ( $p < 0.05$ )                                                                 | CHR-T vs. CHR-NT, replication experiment ( $p < 0.05$ )                                                                                                                                                | Predicted impact                                                                                                                                            |
|------------------------------|---------------------------------------------------------------------------------------------------------------------|--------------------------------------------------------------------------------------------------------------------------------------------------------------------------------------------------------|-------------------------------------------------------------------------------------------------------------------------------------------------------------|
| <b>Complement</b>            | C1Q (↑), C1R (↑) C4BP (↓)<br>SERPING1 (↓)<br><br>FIC3 (↓)<br><br>CFB (↑)<br>CFI (↑), CFH (↑)<br><br>C8 (↑), CLU (↑) | C1Q (↑), C1R (↑), C2 (↑), C4-A (↓)<br>C4BP (↓)<br>SERPING1 (↓)<br><br>FIC3 (↓)<br><br>CFD (↑)<br>CFI (↑), CFH (↑)<br><br>C5 (↑), C6 (↑), C7(↑), C8 (↑), C9 (↑),<br>CLU (↑), VTN, (↑) CPN (↑), CPB2 (↑) | Classical pathway:<br>activation ↑ regulation ↓<br><br><br><br><br>iC3b generation ↑<br><br>Terminal pathway:<br>activation ↑ regulation ↑                  |
| <b>Coagulation</b>           | FXI (↑)<br>SERPING1(↓)<br>SERPIND1 (↓)<br><br>ADAMTS13 (↓)<br><br>PLG (↑)                                           | IX (↑), CPN (↑) SERPING1(↑)<br>VWF (↑)<br><br>FII (↑), FV (↑), SERPINF2 (↑)<br>SERPIND1 (-)<br>CPB2 (↑)<br><br>XIII (↑), FIB (↓)<br><br>PLG (↑)                                                        | Intrinsic pathway activation<br>↑ regulation ↓<br><br>Thrombin generation ↑<br>Thrombin regulation ↓<br><br>Fibrin generation ↑<br><br>Plasmin generation ↑ |
| <b>Associated components</b> | IGM, IGG (↓)<br><br>A2M (↓)                                                                                         | IGM, IGG (↓)<br><br>A2M (↓)                                                                                                                                                                            | Complement classical pathway ↑<br><br>Plasmin/thrombin regulation ↓                                                                                         |

**Notes**

The directions of the differentially expressed proteins indicate a general upregulation of activation components and downregulation of regulatory proteins.

With regards to the complement system, we observe upregulation of complement classical pathway components (C1Q, C1R, C2, C4 and IGG, IGM), while key regulators (SERPING1, C4BP) are downregulated. Classical pathway activation would lead to alternative pathway activation and amplification leading to opsonin C3b generation.<sup>1</sup> Key alternative pathway regulatory components (CFH, CFI) are upregulated resulting in increased iC3b, both C3b and iC3b serve as ligands for selective complement receptors on leukocytes.<sup>2</sup> Terminal pathway components are upregulated (C5, C6, C7, C8, C9) leading to an increase in the terminal complement complex C5b-9, while terminal pathway regulators are also upregulated (CLU, VTN), which bind to the nascent amphiphilic C5b-9 complex, rendering it soluble and lytically inactive.<sup>3</sup> Overall, we expect an enhanced output of complement activation products, as a result of enhanced classical pathway activation and dysregulation, amplified through the alternative pathway, while increased terminal pathway components drive the generation of soluble terminal complement component (sTCC).

In the coagulation system, the primary effect is a downregulation of intrinsic pathway control (SERPING1), thrombin (SERPIND1) and plasmin (A2M) regulation while increased plasminogen (PLG) drives plasmin generation. Overall, we expect an increase in thrombin generation and dysregulation, with increased plasmin generation.

1. Merle NS, Church SE, Fremeaux-Bacchi V, Roumenina LT. Complement System Part I - Molecular Mechanisms of Activation and Regulation. *Front Immunol.* 2015;6:262.
2. van Lookeren Campagne M, Wiesmann C, Brown EJ. Macrophage complement receptors and pathogen clearance. *Cellular microbiology.* 2007;9(9):2095-102.
3. Choi NH, Nakano Y, Tobe T, Mazda T, Tomita M. Incorporation of SP-40,40 into the soluble membrane attack complex (SMAC, SC5b-9) of complement. *International immunology.* 1990;2(5):413-7.

**eTable 21: Table summarising directionality of effect of ten percent highest weighted features in Model 1a (EU-GEI initial experiment), Model 3 (EU-GEI replication experiment) and Model 4 (ALSPAC proteomic data)**

| Model 1a: EU-GEI clinical and proteomic data, initial experiment |                                             | Model 3: EU-GEI clinical and proteomic data, replication experiment |                                             | Model 4: ALSPAC proteomic data                      |                                                     |
|------------------------------------------------------------------|---------------------------------------------|---------------------------------------------------------------------|---------------------------------------------|-----------------------------------------------------|-----------------------------------------------------|
| Feature                                                          | Directionality of effect (CHR-T vs. CHR-NT) | Feature                                                             | Directionality of effect (CHR-T vs. CHR-NT) | Feature                                             | Directionality of effect (PE at 18 vs. no PE at 18) |
| P01023 Alpha-2-macroglobulin                                     | ↓                                           | P01023 Alpha-2-macroglobulin                                        | ↓                                           | P04003 C4b-binding protein alpha chain              | ↓                                                   |
| P01871 Immunoglobulin heavy constant mu                          | ↓                                           | P22792 Carboxypeptidase N subunit 2                                 | ↑                                           | P27169 Serum paraoxonase/arylesterase 1             | ↓                                                   |
| P04003 C4b-binding protein alpha chain                           | ↓                                           | P01871 Immunoglobulin heavy constant mu                             | ↓                                           | Q03591 Complement factor H-related protein 1        | ↓                                                   |
| P07357 Complement component 8 alpha chain                        | ↑                                           | P09871 Complement C1s subcomponent                                  | ↓                                           | P07225 Vitamin K-dependent protein S                | ↓                                                   |
| P55058 Phospholipid transfer protein                             | ↓                                           | P01011 Alpha-1-antichymotrypsin                                     | ↑                                           | P61626 Lysozyme C                                   | ↓                                                   |
| O75636 Ficolin-3                                                 | ↓                                           | P00747 Plasminogen                                                  | ↑                                           | P55103 Inhibin beta C chain                         | ↑                                                   |
| P02774 Vitamin D binding protein                                 | ↑                                           | P08571 Monocyte differentiation antigen CD14                        | ↑                                           | Q08380 Galectin-3-binding protein                   | ↑                                                   |
| P07225 Vitamin K-dependent protein S                             | ↓                                           | P10909 Clusterin                                                    | ↑                                           | P24593 Insulin-like growth factor-binding protein 5 | ↑                                                   |
| P43320 Beta-crystallin B2                                        | ↑                                           | Q16610 Extracellular matrix protein 1                               | ↑                                           | P00746 Complement factor D                          | ↑                                                   |
| P02766 Transthyretin                                             | ↓                                           | G3XAM2 Complement factor I                                          | ↑                                           | P01019 Angiotensinogen                              | ↓                                                   |
| P23142 Fibulin-1                                                 | ↑                                           | P04003 C4b binding protein alpha chain                              | ↓                                           | P01871 Immunoglobulin heavy constant mu             | ↓                                                   |
| P10909 Clusterin                                                 | ↑                                           | P13671 Complement component 6                                       | ↑                                           | O75636 Ficolin-3                                    | ↑                                                   |
| P05155 Plasma protease C1 inhibitor                              | ↓                                           | P25311 Zinc alpha-2-glycoprotein                                    | ↑                                           | Q9H4A9 Dipeptidase 2                                | ↓                                                   |
| Sex (female vs. male)                                            | ↓                                           | P07359 Platelet glycoprotein Ib alpha chain                         | ↑                                           | P01023 Alpha-2-macroglobulin                        | ↓                                                   |
| P00747 Plasminogen                                               | ↑                                           | P01031 Complement C5                                                | ↑                                           | P04275 von Willebrand factor                        | ↓                                                   |
| P13671 Complement component 6                                    | ↑                                           | O75882 Attractin                                                    | ↑                                           | Q9NQ79 Cartilage acidic protein 1                   | ↑                                                   |
| P02747 Complement C1q subcomponent subunit C                     | ↑                                           | P0DOY3 Immunoglobulin lambda constant 3                             | ↓                                           | P24592 Insulin-like growth factor-binding protein 6 | ↑                                                   |
| P02753 Retinol-binding protein 4                                 | ↑                                           | P15169 Carboxypeptidase N catalytic chain (CPN)                     | ↑                                           | P09871 Complement C1s subcomponent                  | ↓                                                   |

|                                                                          |   |  |  |                                           |   |
|--------------------------------------------------------------------------|---|--|--|-------------------------------------------|---|
| Q76LX8 A disintegrin and metalloproteinase with thrombospondin motifs 13 | ↓ |  |  | P10909 Clusterin                          | ↓ |
| P08697 Alpha-2-antiplasmin                                               | ↓ |  |  | O95497 Pantetheinase                      | ↑ |
| P19827 Inter-alpha-trypsin inhibitor heavy chain H1                      | ↑ |  |  | P02654 Apolipoprotein C-I                 | ↓ |
| MADRS: concentration difficulties                                        | ↓ |  |  | P02679 Fibrinogen gamma chain             | ↓ |
| P02489 Alpha-crystallin A chain                                          | ↑ |  |  | P07358 Complement component C8 beta chain | ↑ |
|                                                                          |   |  |  | Q5T7F0 Neuropilin                         | ↓ |
|                                                                          |   |  |  | P04040 Catalase                           | ↑ |
|                                                                          |   |  |  | P43251 Biotinidase                        | ↑ |

**eFigure 1: Derivation and testing of Model 2b: parsimonious (10-predictor) proteomic model**

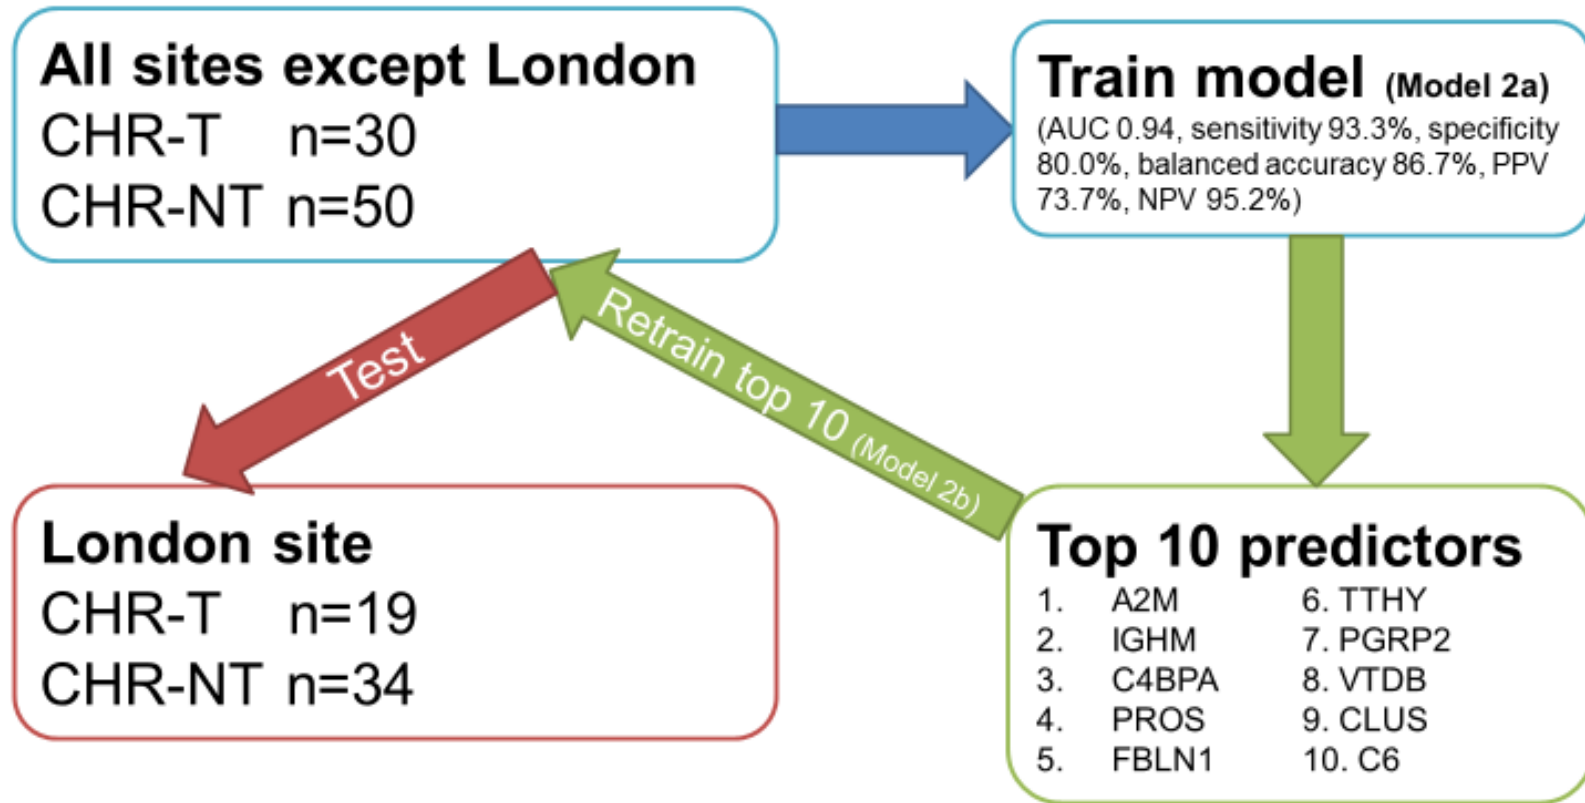

**Notes.** To derive the 10 highest-weighted proteins for prediction of transition outcome, an L2-regularised SVM model was trained using the proteomic data from all sites except London (CHR-T n=30, CHR-NT n=50), with leave-site-out cross-validation (Model 2a). The top 10 predictors, ranked by mean feature weight across models selected in the inner loop, are presented in the figure. Next, a reduced model based solely on these 10 features (Model 2b) was trained using data from all sites except London (Model 1d). This reduced model was then tested in the held-out London sample (CHR-T n=19, CHR-NT n=34).

AUC: area under the receiver-operating curve; PPV: positive predictive value; NPV: negative predictive value; A2M: alpha-2-macroglobulin; IGHM: immunoglobulin heavy constant mu; C4BPA: C4b-binding protein alpha chain; PROS: vitamin K-dependent protein S; FBLN1: Fibulin-1; TTHY: transthyretin; PGRP2: N-acetylmuramoyl-L-alanine amidase; VTDB: vitamin D binding protein; CLUS: clusterin; C6: complement component 6

**eFigure 2: STRING functional protein association network for proteins significantly differentially expressed (following false discovery rate correction) between CHR-T and CHR-NT in EU-GEI initial experiment**

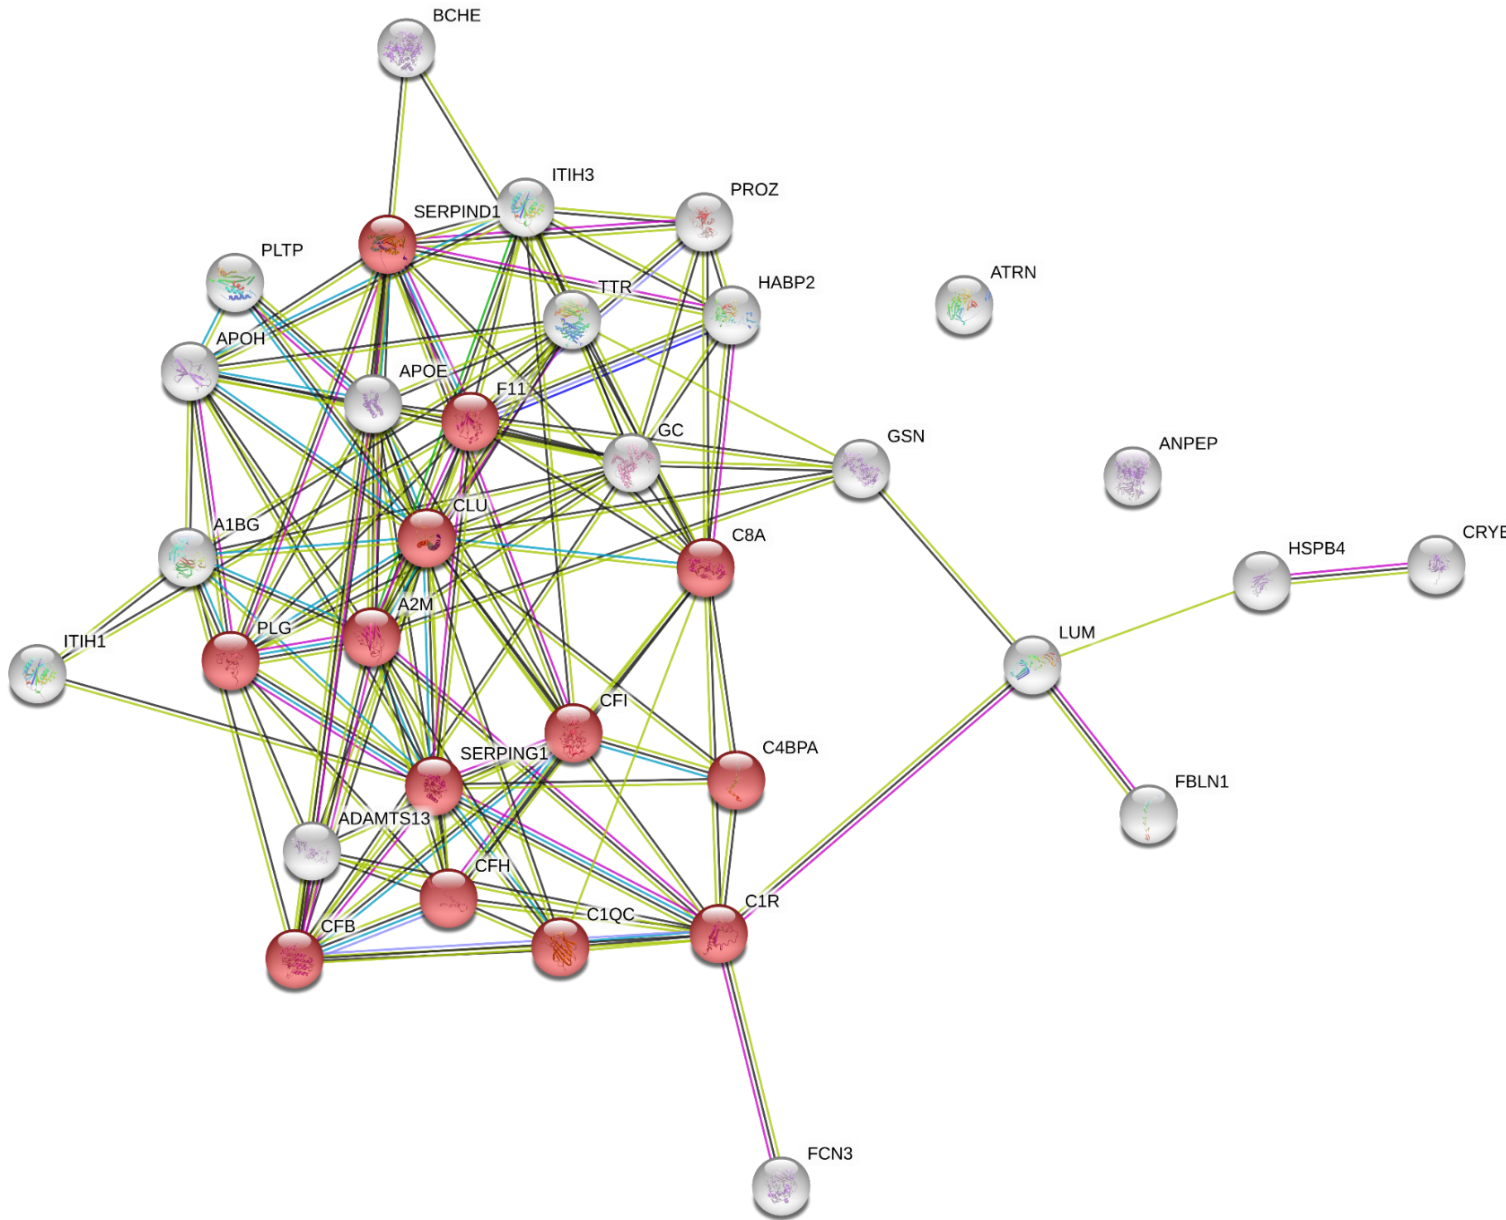

The network nodes are proteins. Proteins implicated in the complement and coagulation cascades are highlighted in red.

The edges represent functional associations between proteins, and the colour of each edge represents the source of evidence for that association:

- Red line - fusion evidence
- Green line - neighbourhood evidence
- Blue line - co-occurrence evidence
- Purple line - experimental evidence
- Yellow line - text-mining evidence
- Light blue line - database evidence
- Black line - co-expression evidence.

Note: IGHM is not listed in the STRING database and hence is not shown.

STRING database: <https://string-db.org/>



**eFigure 3: Mean algorithm scores and class predictions (A) and receiver-operating characteristic curve (B) for Model 1b: clinical data**

**A**

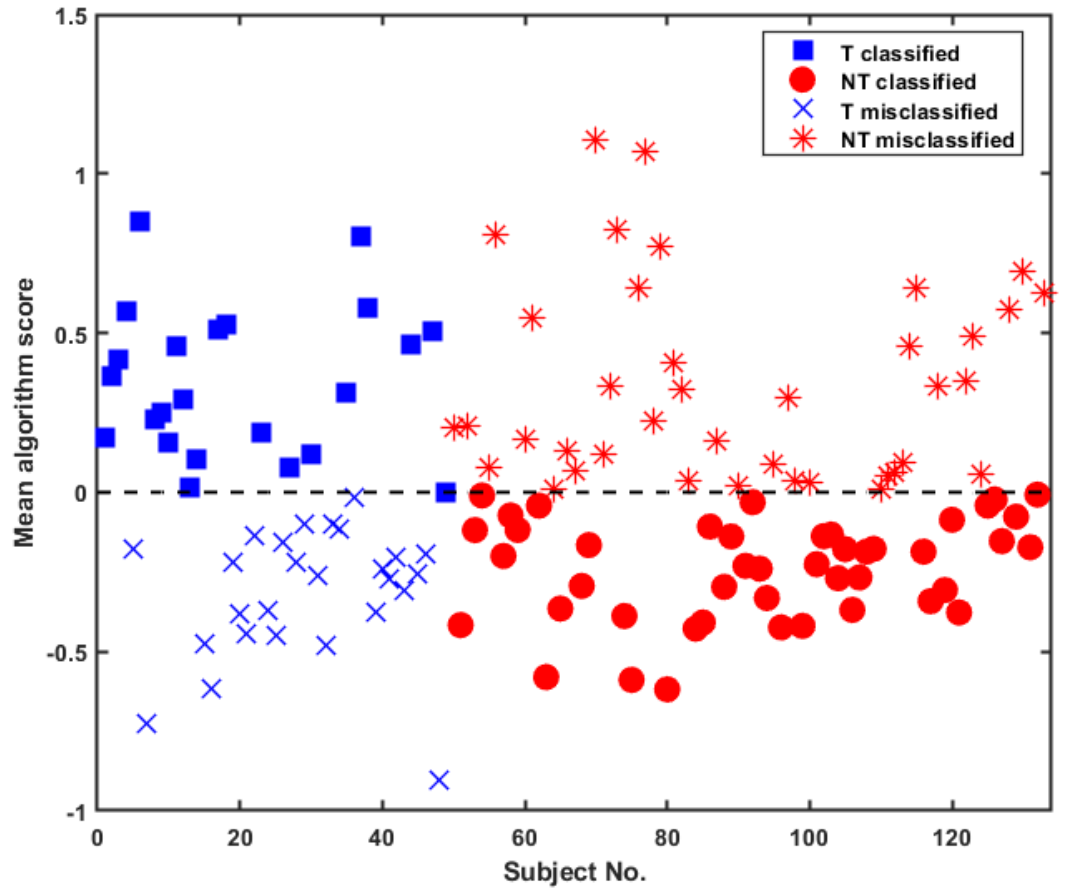

T: clinical high-risk participants who transitioned to first episode psychosis; NT: clinical high-risk participants who did not transition.

**B**

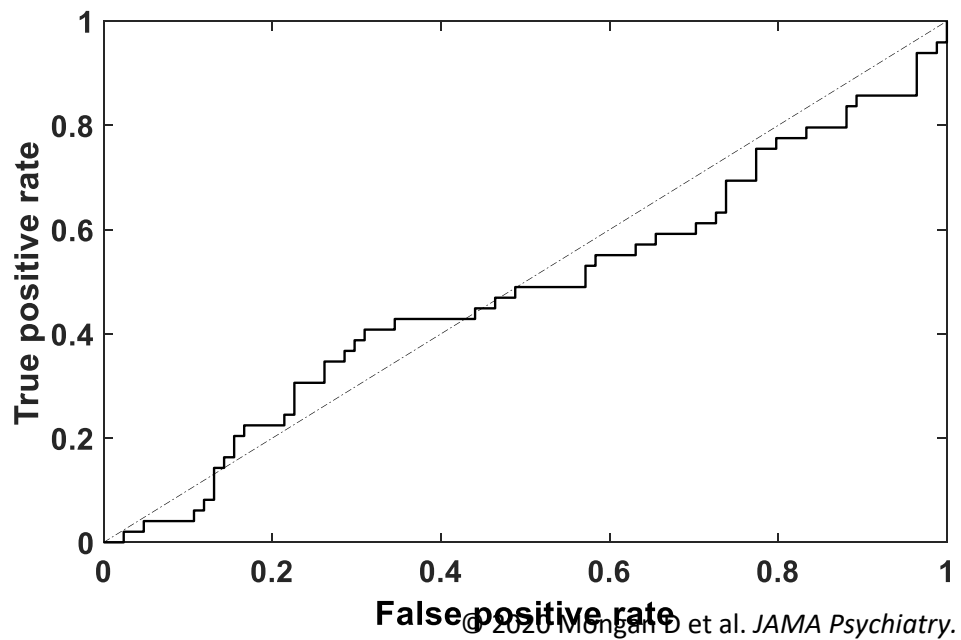

**eFigure 4: Mean algorithm scores and class predictions (A) and receiver-operating characteristic curve (B) for Model 1c: proteomic data**

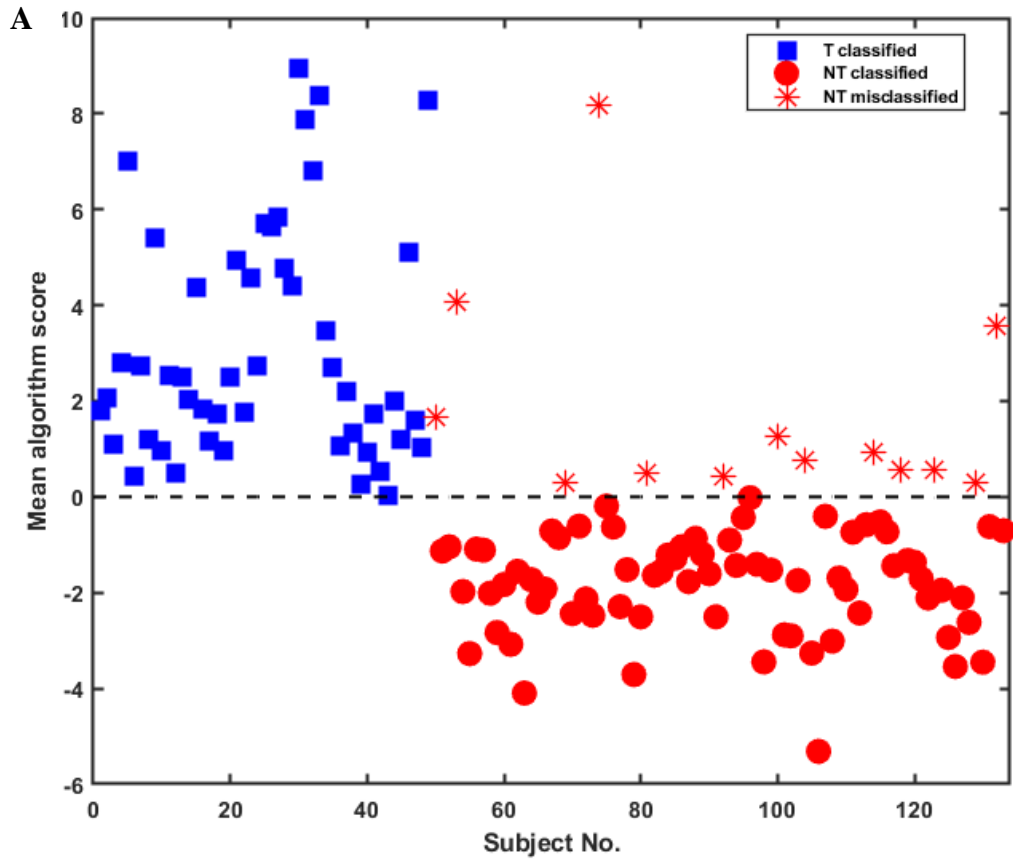

T: clinical high-risk participants who transitioned to first episode psychosis; NT: clinical high-risk participants who did not transition.

**B**

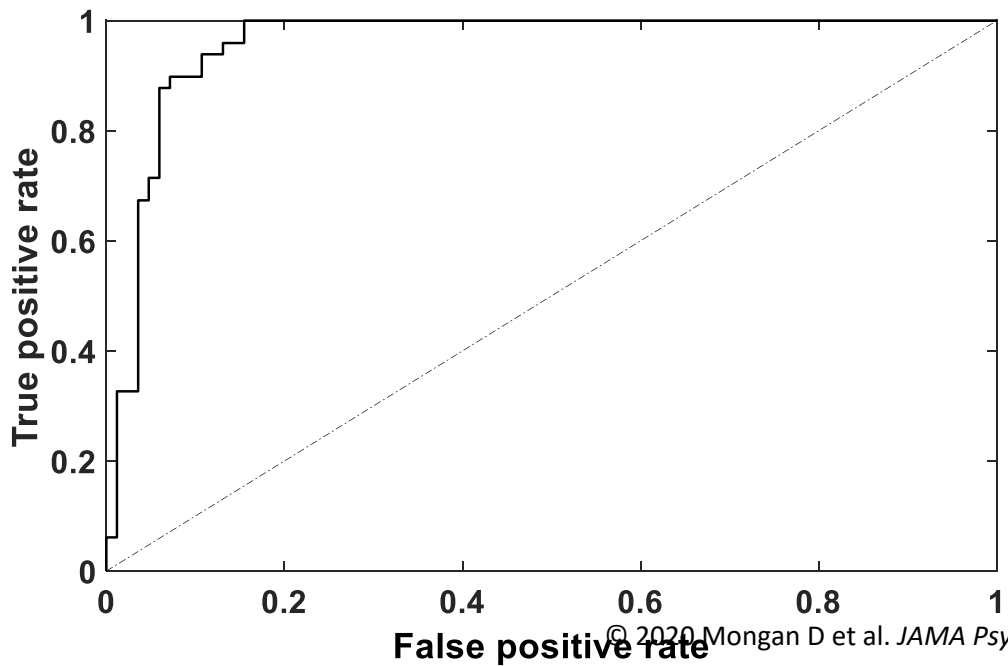

**eFigure 5: Mean algorithm scores and class predictions (A) and receiver-operating characteristic curve (B) for Model 2a: proteomic (non-London)**

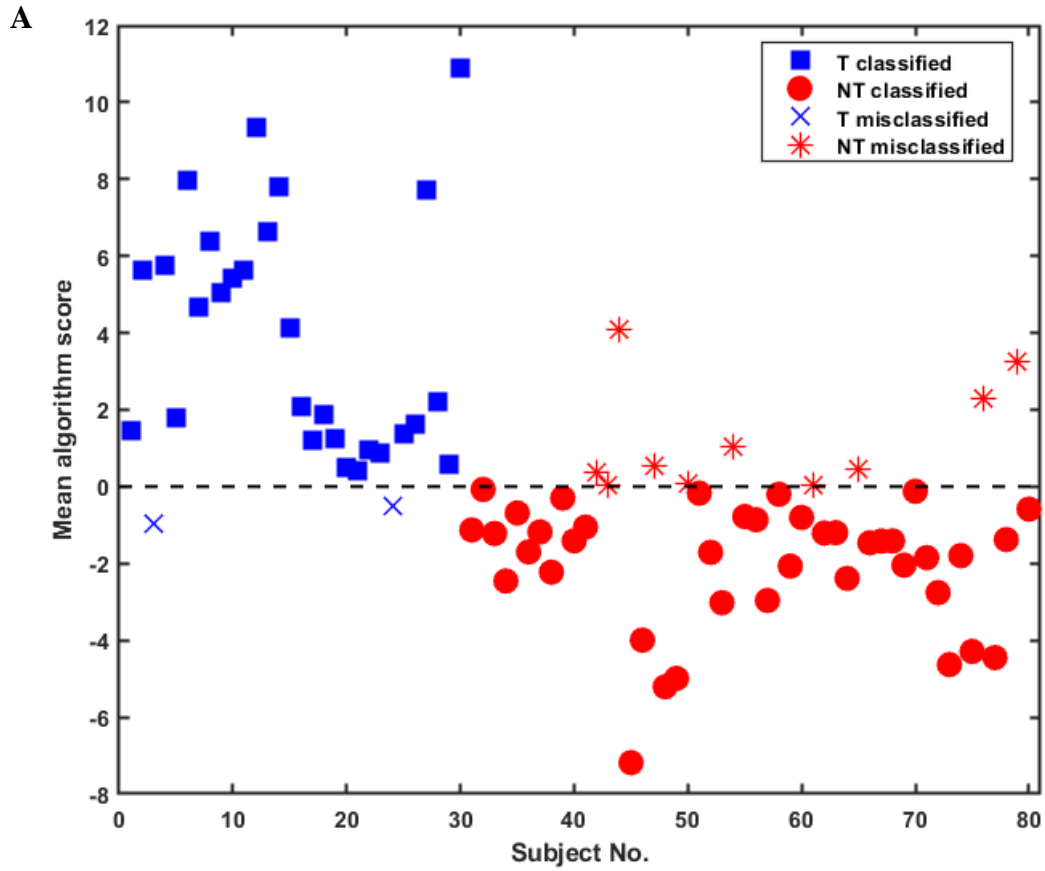

T: clinical high-risk participants who transitioned to first episode psychosis; NT: clinical high-risk participants who did not transition.

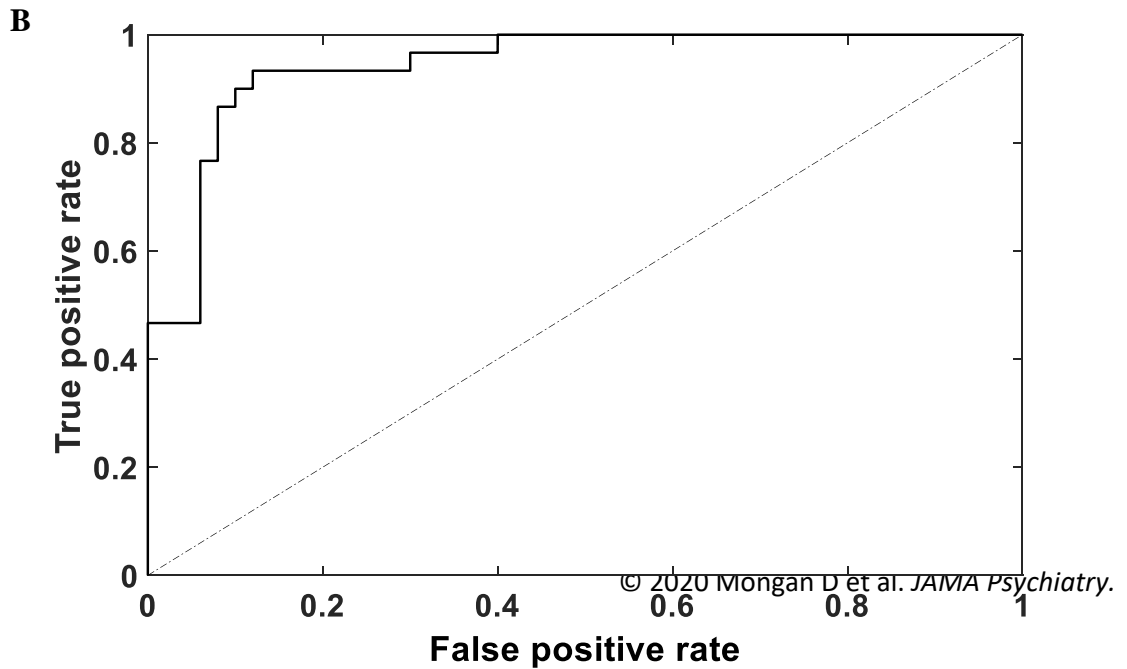

**eFigure 6: Mean algorithm scores and class predictions (A) and receiver-operating characteristic curve (B) for Model 2b: parsimonious (10-predictor) proteomic model, training data (non-London)**

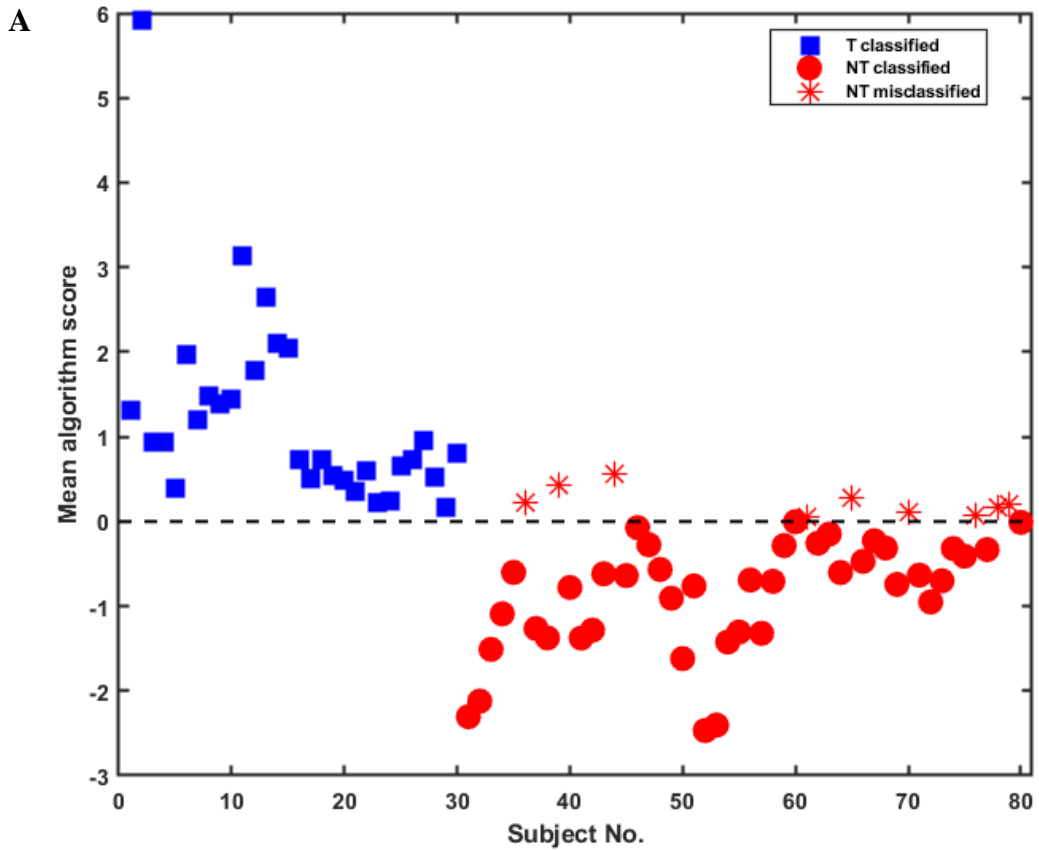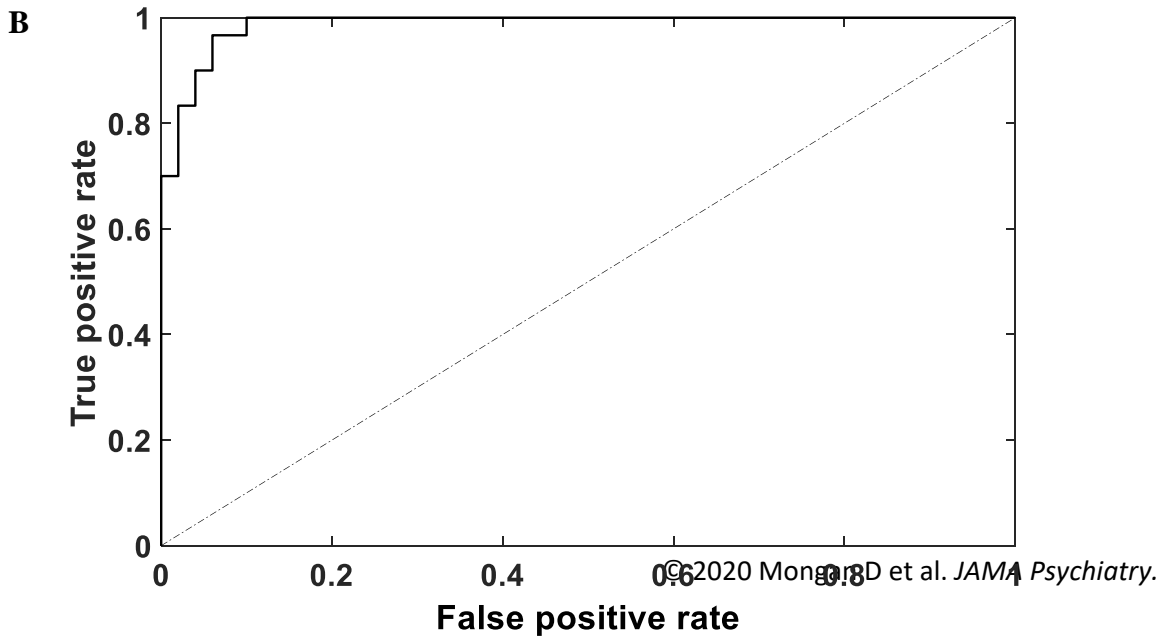

**eFigure 7: Mean algorithm scores and class predictions (A) and receiver-operating characteristic curve (B) for Model 3: replication**

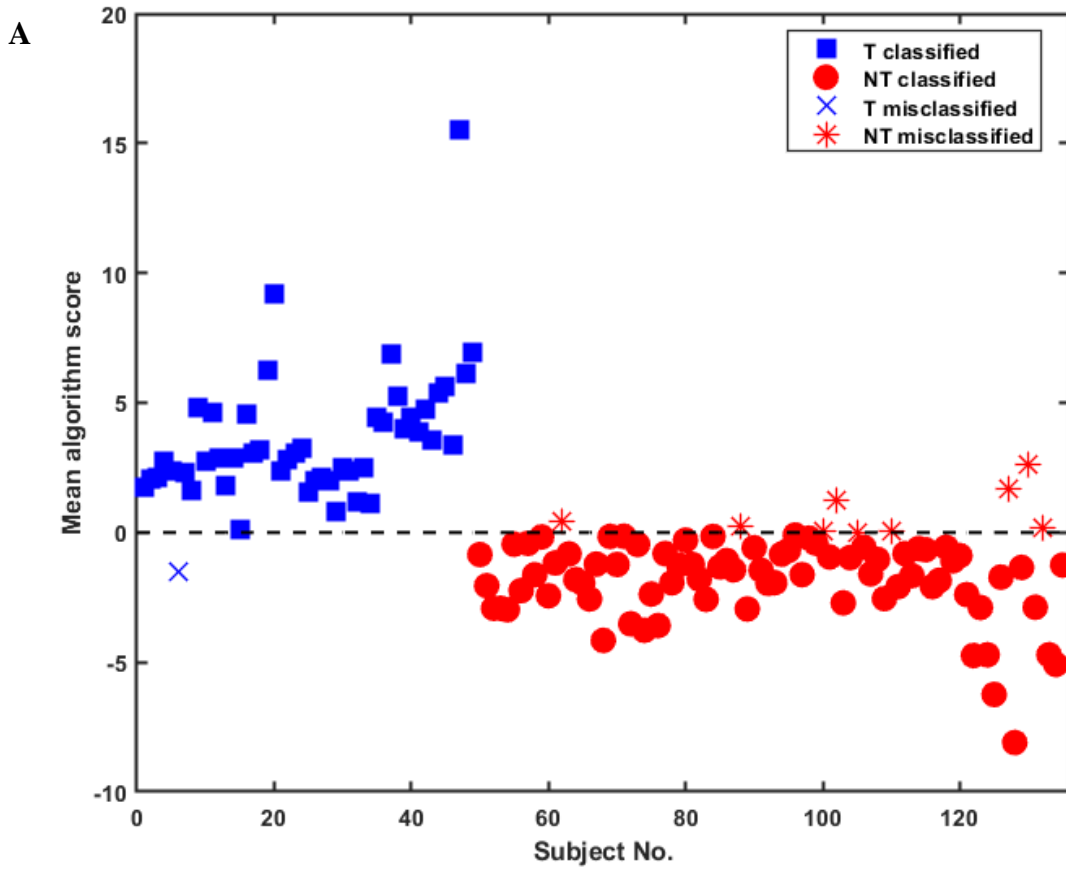

T: clinical high-risk participants who transitioned to first episode psychosis; NT: clinical high-risk participants who did not transition

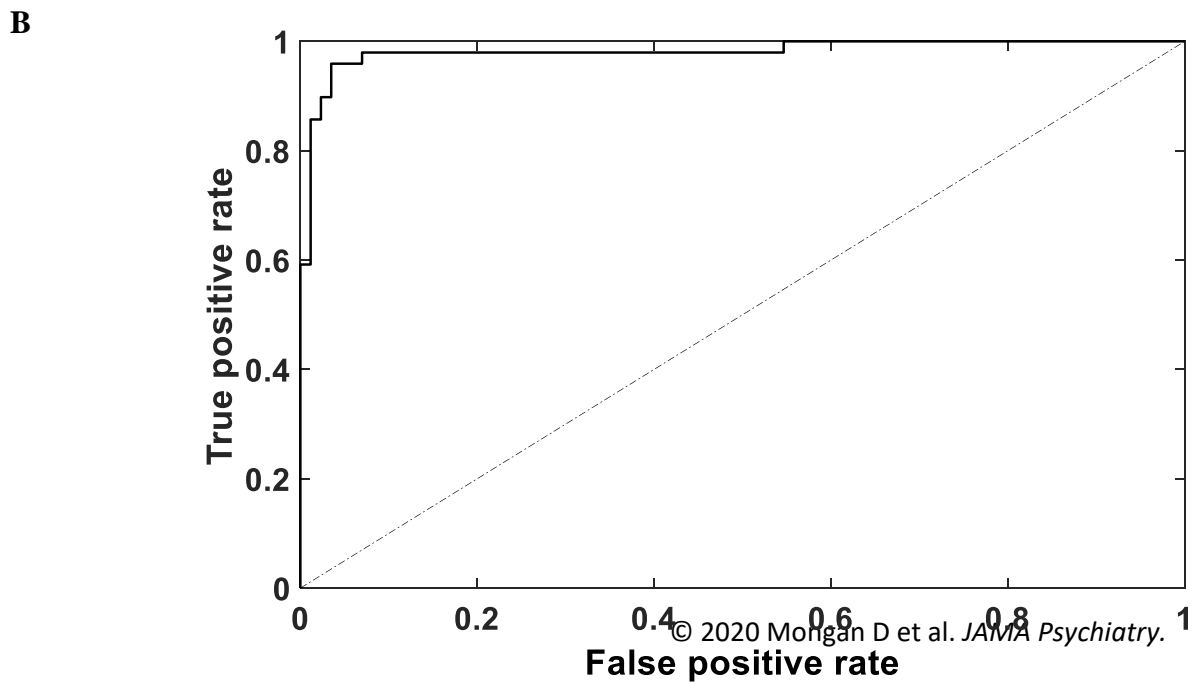

**eFigure 8: Mean algorithm scores and class predictions (A) and receiver-operating characteristic curve (B) for Model 4: ALSPAC proteomic data**

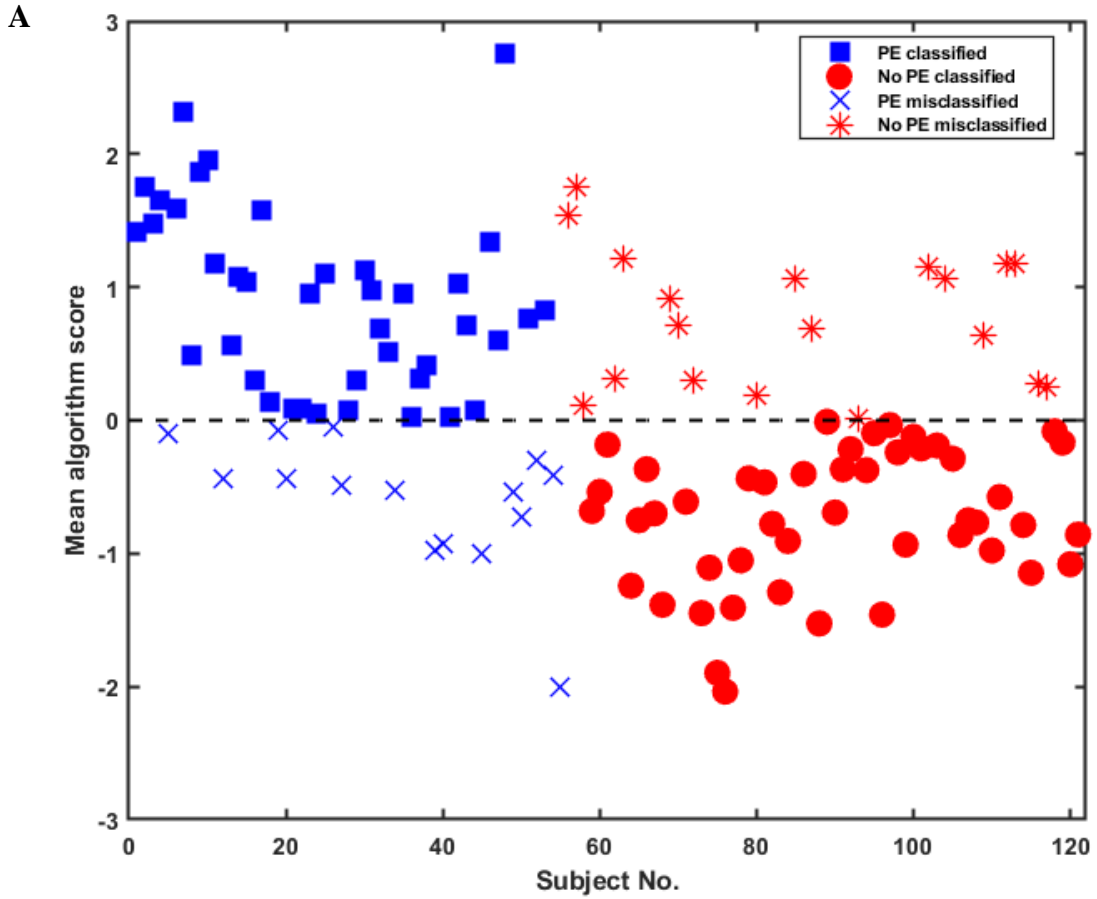

PE: psychotic experiences at 18; No PE: No psychotic experiences at 18.

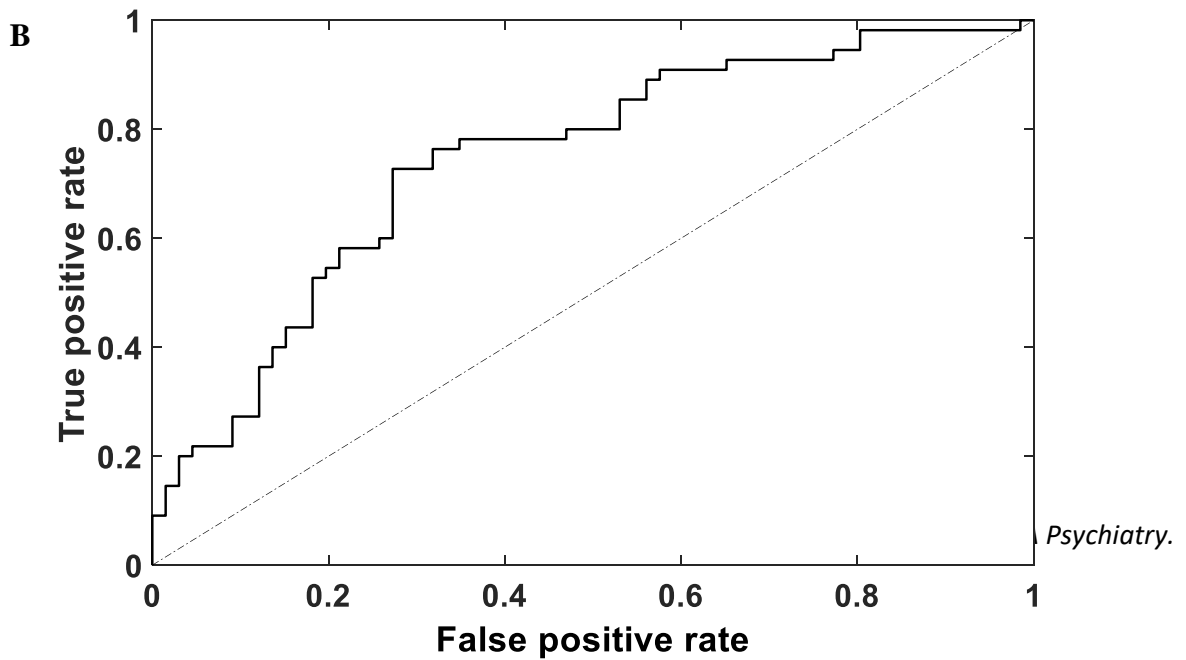

**eFigure 9: Mean algorithm scores and class predictions (A) and receiver-operating characteristic curve (B) for Model S1: ELISA**

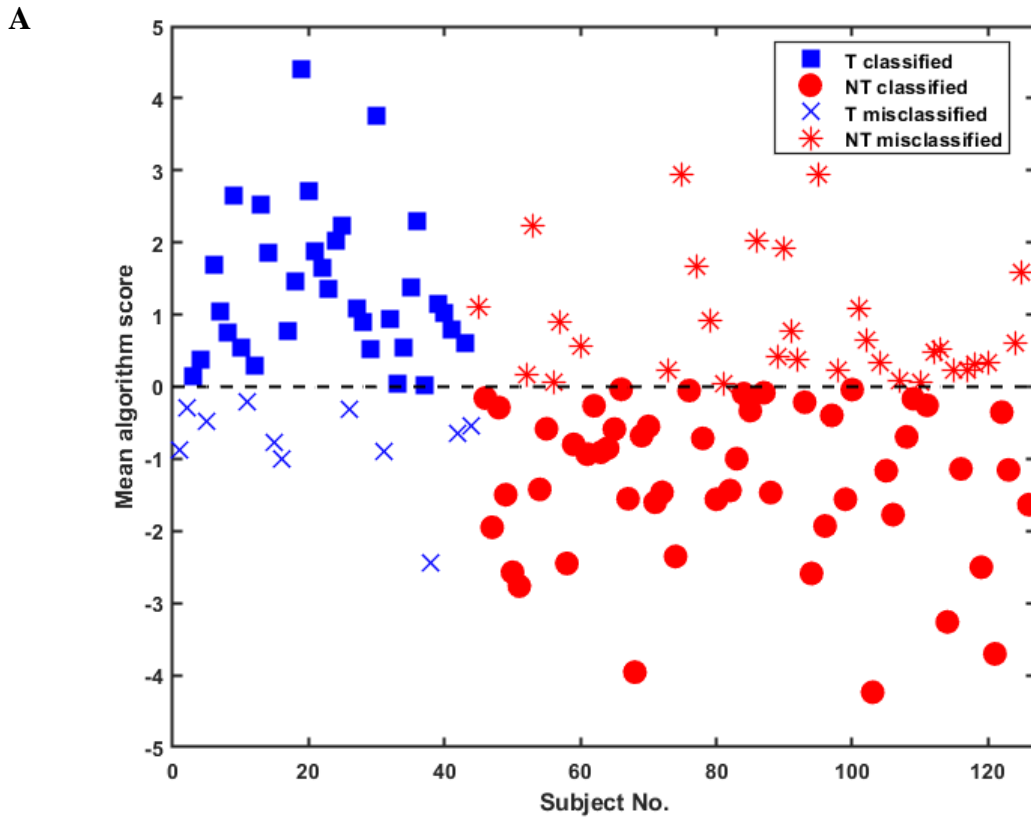

T: clinical high-risk participants who transitioned to first episode psychosis; NT: clinical high-risk participants who did not transition

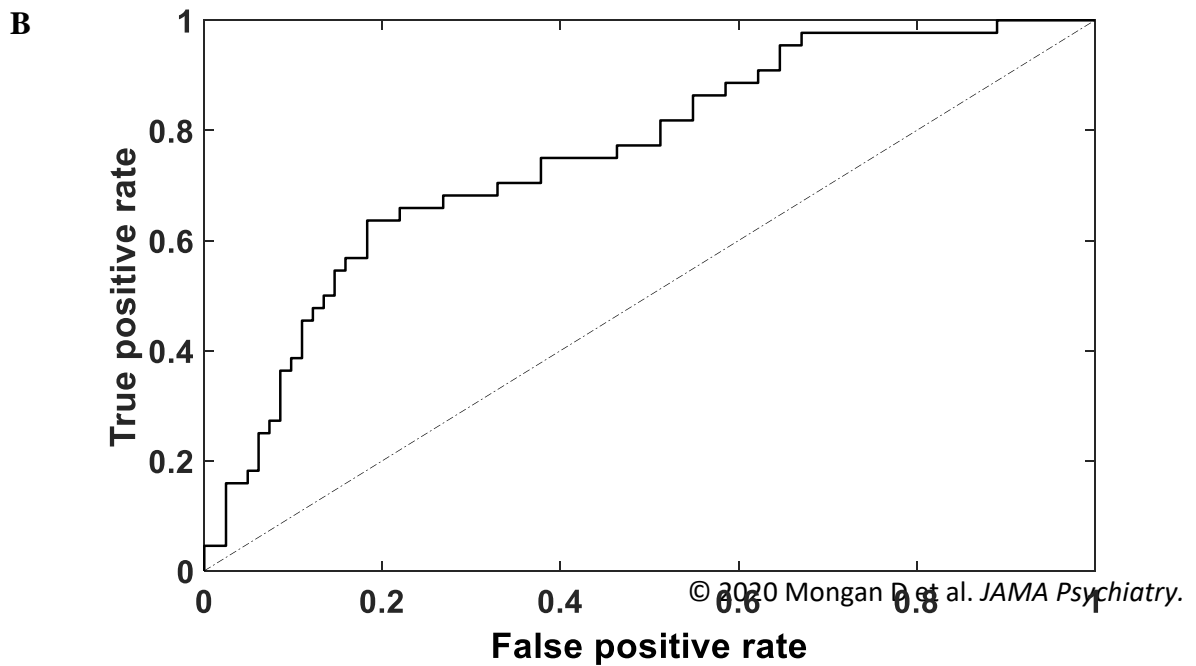

**eFigure 10: Mean algorithm scores and class predictions (A) and receiver-operating characteristic curve (B) for Model S2: functional outcome**

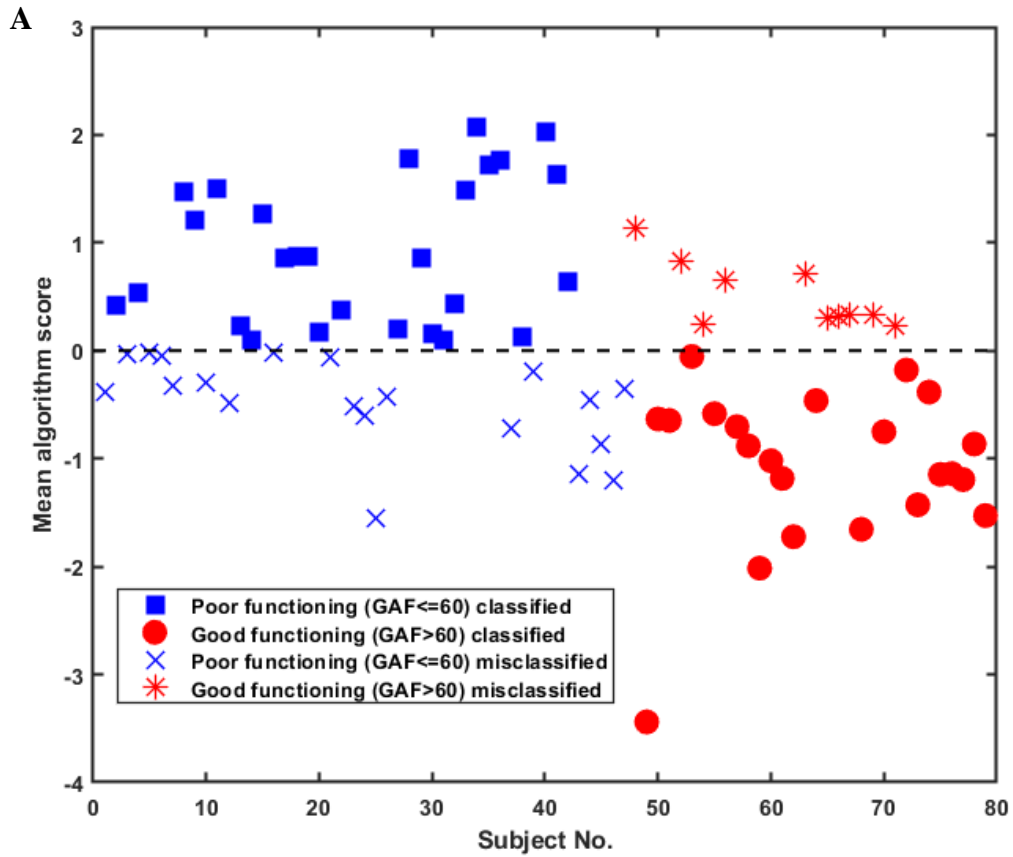

GAF: General Assessment of Functioning (disability subscale); Poor: GAF score ≤60 at 24 months; Good: GAF score >60 at 24 months

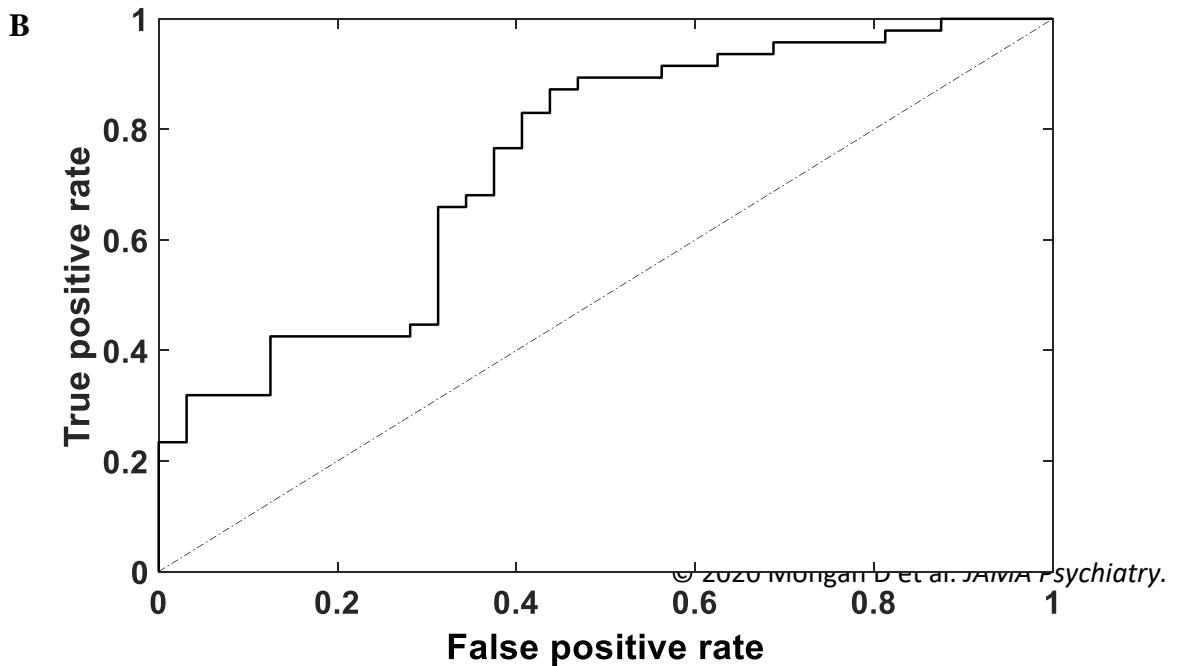



**eFigure 11: Model 1b (clinical data) decision scores stratified by EU-GEI site**

**a. Box plots for Model 1b (clinical data) decision scores, stratified by EU-GEI site**

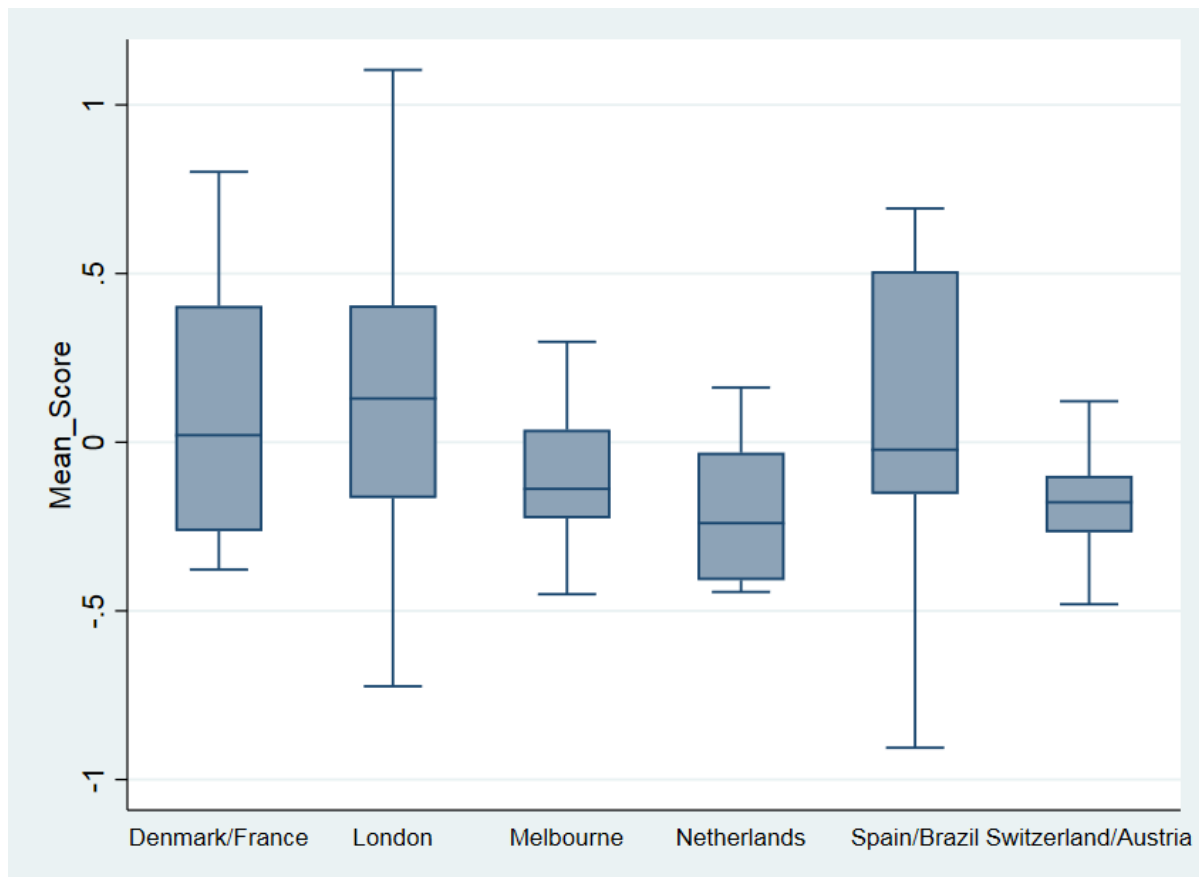

**b. Kruskal-Wallis test**

|                     | London       | Netherlands | Melbourne | Switzerland/Austria | Denmark/France |
|---------------------|--------------|-------------|-----------|---------------------|----------------|
| Netherlands         | 3.308        |             |           |                     |                |
| <i>p</i>            | <b>0.007</b> |             |           |                     |                |
| Melbourne           | 2.021        | -0.969      |           |                     |                |
| <i>p</i>            | 0.324        | 1.000       |           |                     |                |
| Switzerland/Austria | 2.626        | -0.480      | 0.481     |                     |                |
| <i>p</i>            | 0.065        | 1.000       | 1.000     |                     |                |
| Denmark/France      | 0.786        | -2.352      | -1.231    | -1.771              |                |
| <i>p</i>            | 1.000        | 0.140       | 1.000     | 0.574               |                |
|                     | 0.349        | -2.269      | -1.297    | -1.768              | -0.248         |

Spain/Brazil

$p$  Chi-squared (5 d.f.): 16.878  
c. Post hoc Dunnett test pairwise comparisons with Bonferroni-corrected  $p$  values  
 $p = 0.0047$

**eFigure 12: Model 1c (proteomic data) decision scores stratified by EU-GEI site**

**a. Box plots for Model 1c (proteomic data) decision scores stratified by EU-GEI site**

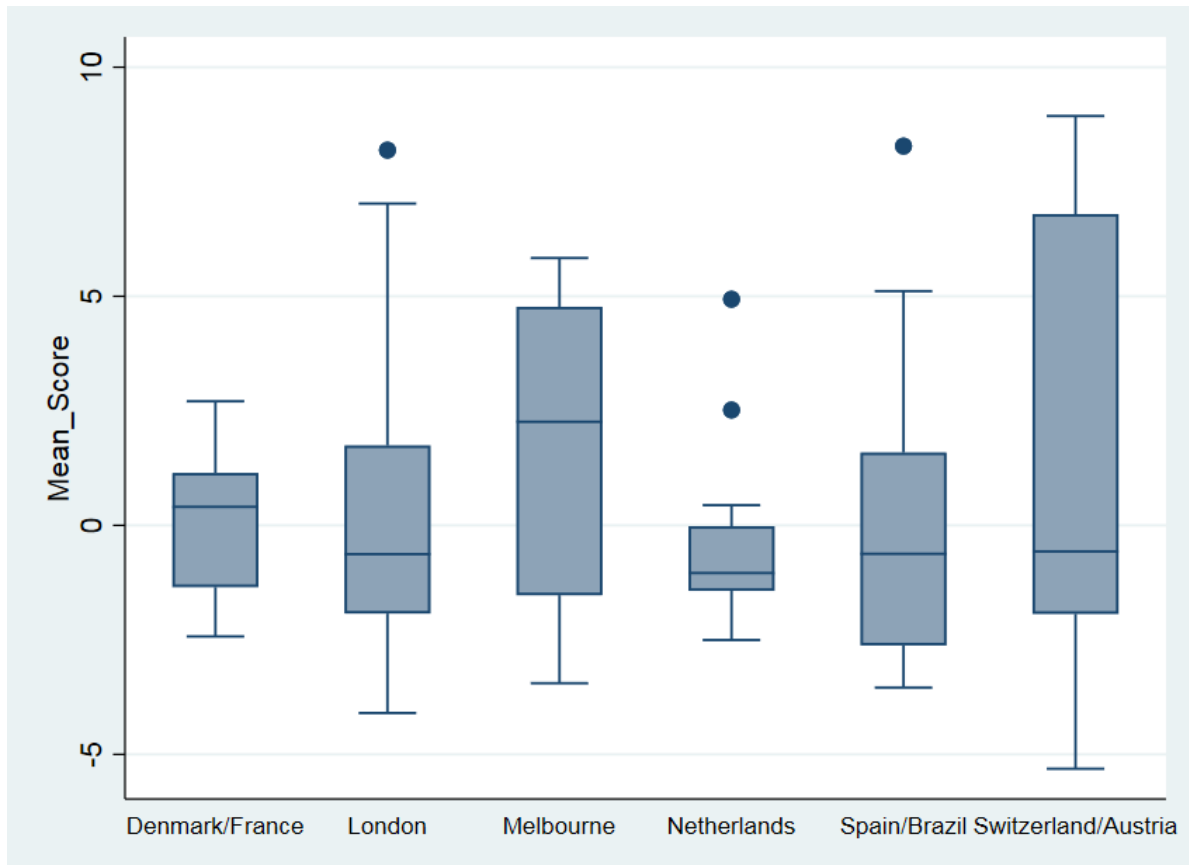

**b. Kruskal-Wallis test**

Chi-squared (5 d.f.): 3.512  
 $p = 0.6216$

**eFigure 13: Age stratified by EU-GEI site**

**a. Box plots for age in years, stratified by EU-GEI site**

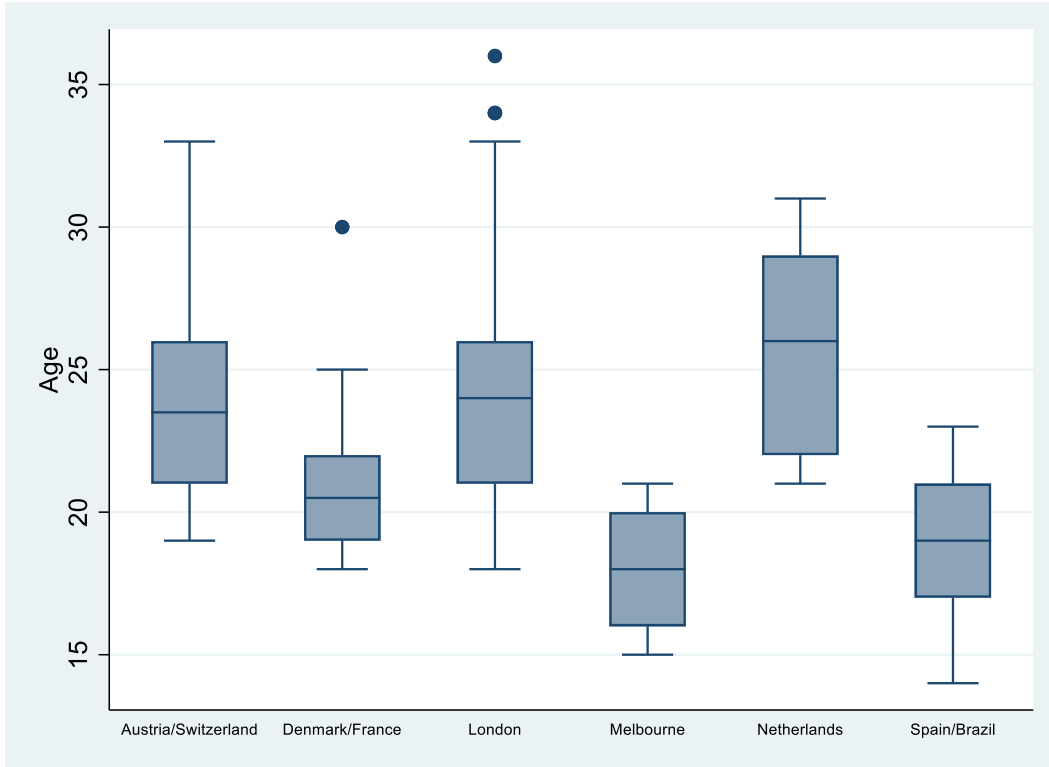

**b. Kruskal-Wallis test**

Chi-sq (5 d.f.): 49.157

$p = 0.0001$

**c. Post-hoc Dunn's test pairwise comparisons with Bonferroni-corrected p values**

|                | Austria/Switzerland | Denmark/France | London           | Melbourne | Netherlands |
|----------------|---------------------|----------------|------------------|-----------|-------------|
| Denmark/France | 2.283               |                |                  |           |             |
| $p$            | 0.168               |                |                  |           |             |
| London         | 0.077               | -3.027         |                  |           |             |
| $p$            | 1.000               | <b>0.019</b>   |                  |           |             |
| Melbourne      | 4.034               | 2.250          | 4.996            |           |             |
| $p$            | <b>&lt;0.001</b>    | 0.183          | <b>&lt;0.001</b> |           |             |

|              |              |              |                  |                  |                  |
|--------------|--------------|--------------|------------------|------------------|------------------|
| Netherlands  | -1.012       | -3.476       | -1.366           | -5.115           |                  |
| <i>p</i>     | 1.000        | <b>0.004</b> | 1.000            | <b>&lt;0.001</b> |                  |
| Spain/Brazil | 3.297        | 1.458        | 4.029            | -0.661           | 4.344            |
| <i>p</i>     | <b>0.007</b> | 1.000        | <b>&lt;0.001</b> | 1.000            | <b>&lt;0.001</b> |

**eFigure 14: Years in education stratified by EU-GEI site**

**a. Box plots for years in education, stratified by EU-GEI site**

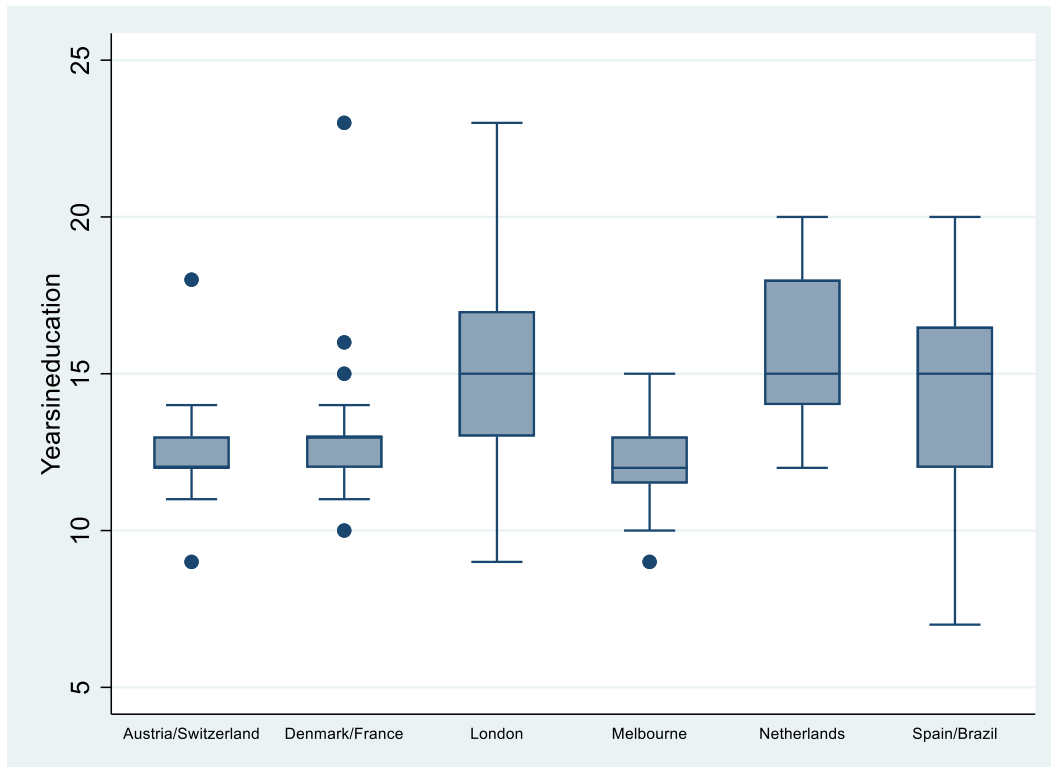

**b. Kruskal-Wallis test**

Chi-sq (5 d.f.): 23.921  
*p* = 0.0002

**c. Post-hoc Dunn's test pairwise comparisons with Bonferroni-corrected *p* values**

|                | Austria/Switzerland | Denmark/France | London | Melbourne | Netherlands |
|----------------|---------------------|----------------|--------|-----------|-------------|
| Denmark/France | -0.350              |                |        |           |             |
| <i>p</i>       | 1.000               |                |        |           |             |
| London         | -2.528              | -2.688         |        |           |             |
| <i>p</i>       | 0.086               | 0.054          |        |           |             |
| Melbourne      | 0.291               | 0.704          | 3.115  |           |             |

|             |              |              |              |              |
|-------------|--------------|--------------|--------------|--------------|
| $p$         | 1.000        | 1.000        | <b>0.014</b> |              |
| Netherlands | -3.064       | -3.184       | -1.290       | -3.551       |
| $p$         | <b>0.016</b> | <b>0.011</b> | 1.000        | <b>0.003</b> |

**eFigure 15: Body mass index stratified by EU-GEI site**

**a. Box plots for body mass index (BMI) in kg/m<sup>2</sup>, stratified by EU-GEI site**

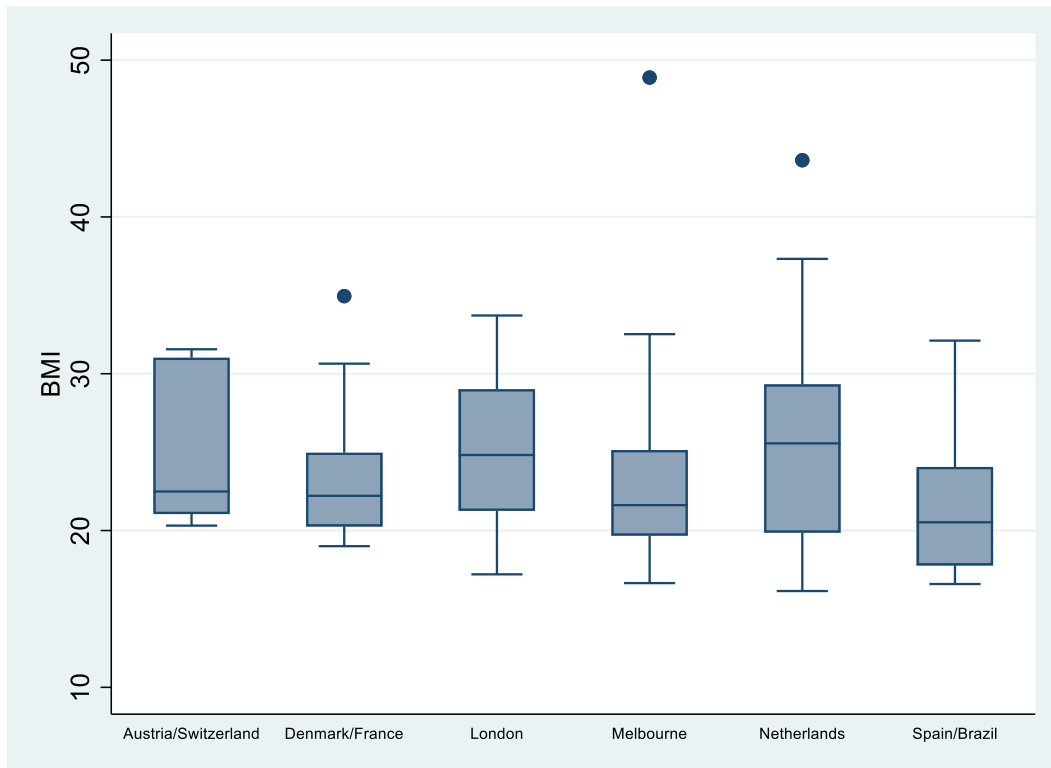

**b. Kruskal-Wallis test**

Chi-sq (5 d.f.): 8.985

$p = 0.1097$

## eFigure 16: Sex stratified by EU-GEI site

### a. Sex distribution, stratified by EU-GEI site

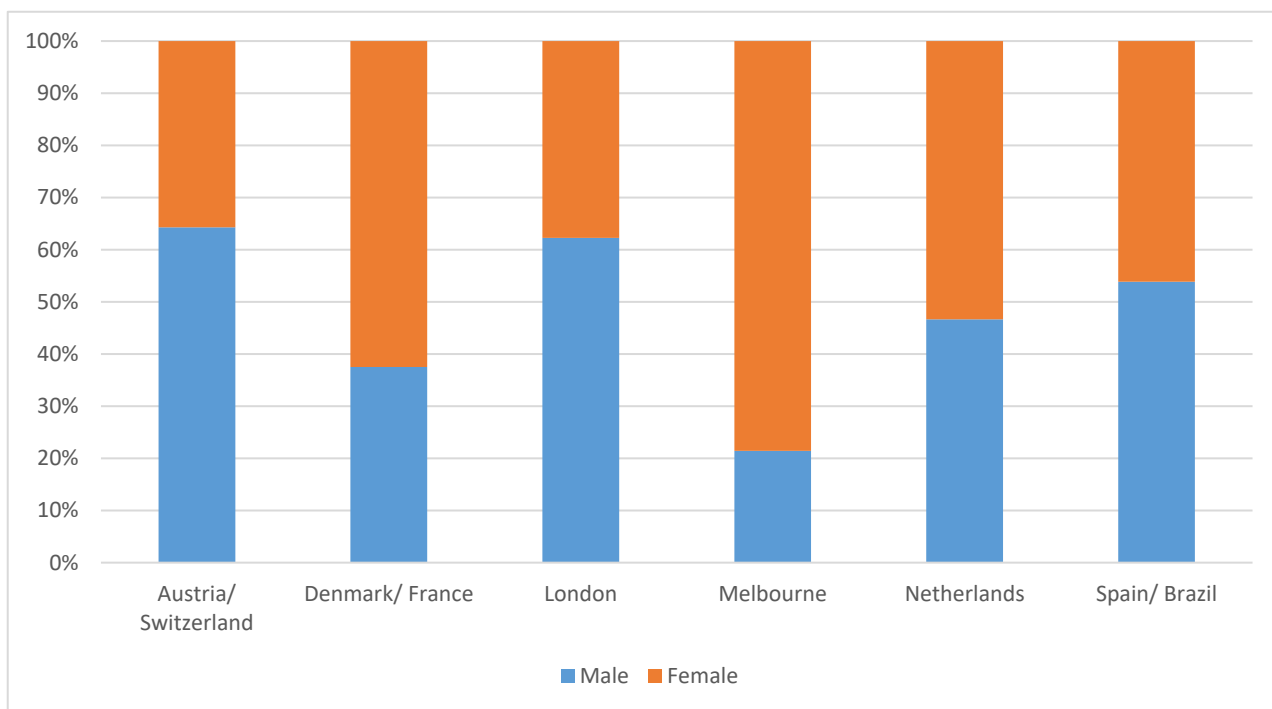

### b. Chi-squared test

|                                 | Male, n (%) | Female, n (%) |
|---------------------------------|-------------|---------------|
| <b>Austria/<br/>Switzerland</b> | 9 (64%)     | 5 (36%)       |
| <b>Denmark/<br/>France</b>      | 9 (28%)     | 15 (62%)      |
| <b>London</b>                   | 33 (62%)    | 20 (38%)      |
| <b>Melbourne</b>                | 3 (21%)     | 11 (79%)      |
| <b>Netherlands</b>              | 7 (47%)     | 8 (53%)       |
| <b>Spain/ Brazil</b>            | 7 (54%)     | 6 (46%)       |

Chi-squared (5 d.f.): 10.4852,  $p=0.063$

**eFigure 17: General Assessment of Functioning symptoms subscale stratified by EU-GEI site**

**a. Box plots for General Assessment of Functioning (GAF) symptoms subscale score, stratified by EU-GEI site**

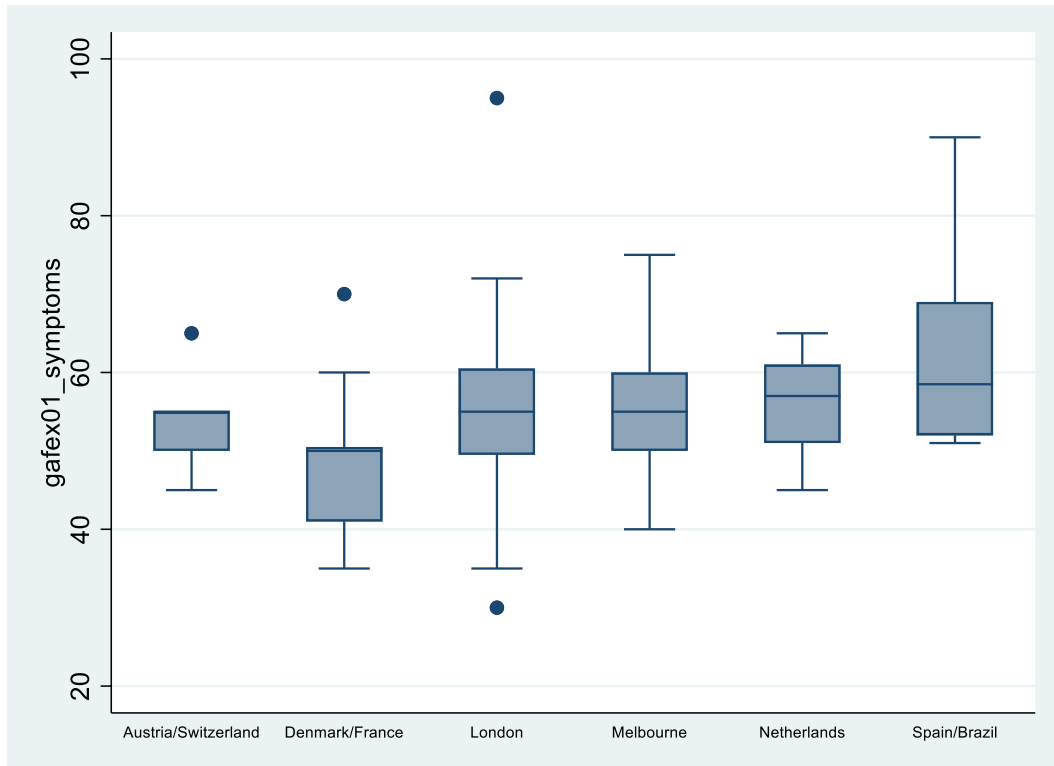

**b. Kruskal-Wallis test**

Chi-sq (5 d.f.): 15.575

$p = 0.0082$

**c. Post-hoc Dunn's test pairwise comparisons with Bonferroni-corrected p values**

|                | Austria/Switzerland | Denmark/France | London | Melbourne | Netherlands |
|----------------|---------------------|----------------|--------|-----------|-------------|
| Denmark/France | 1.218               |                |        |           |             |
| $p$            | 1.000               |                |        |           |             |
| London         | -0.952              | -2.624         |        |           |             |
| $p$            | 1.000               | 0.065          |        |           |             |
| Melbourne      | -0.688              | -1.941         | 0.082  |           |             |

|              |        |              |        |        |        |
|--------------|--------|--------------|--------|--------|--------|
| $p$          | 1.000  | 0.392        | 1.000  |        |        |
| Netherlands  | -1.527 | -2.876       | -0.967 | -0.815 |        |
| $p$          | 0.950  | <b>0.030</b> | 1.000  | 1.000  |        |
| Spain/Brazil | -2.275 | -3.576       | -1.922 | -1.601 | -0.858 |

**Figure 18: General Assessment of Functioning disability subscale stratified by EU-GEI site**

**a. Box plots for General Assessment of Functioning (GAF) disability subscale score, stratified by EU-GEI site**

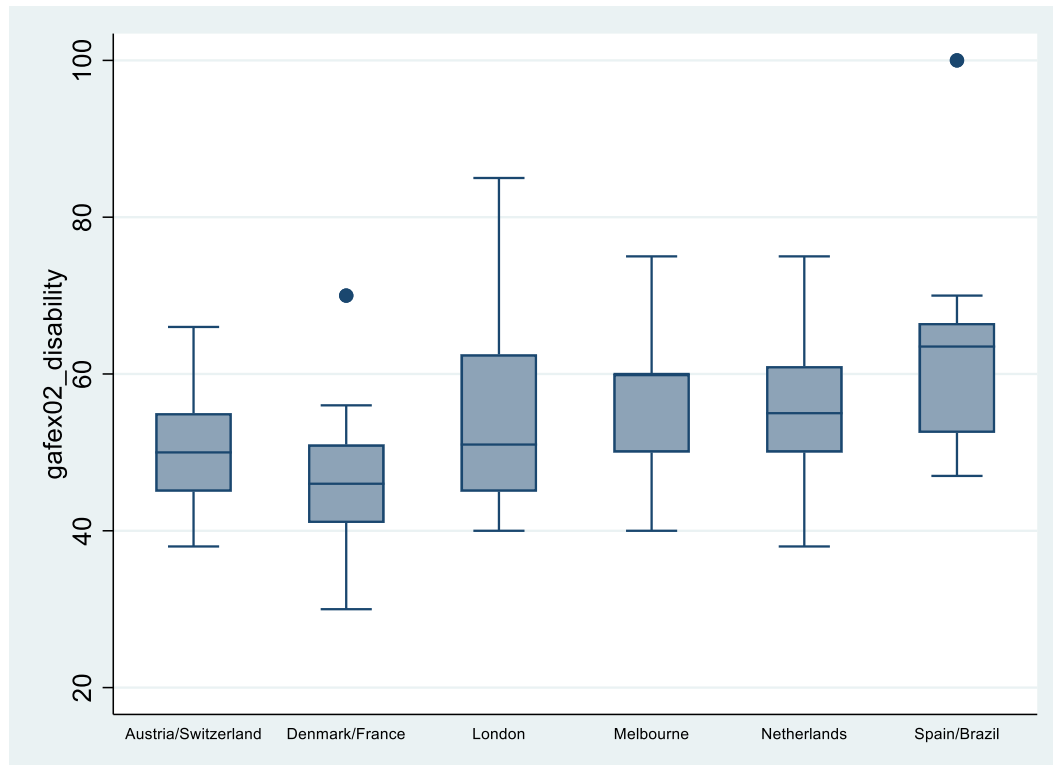

**b. Kruskal-Wallis test**

Chi-sq (5 d.f.): 15.838

$p = 0.0073$

**c. Post-hoc Dunn's test pairwise comparisons with Bonferroni-corrected p values**

|                | Austria/Switzerland | Denmark/France | London | Melbourne | Netherlands |
|----------------|---------------------|----------------|--------|-----------|-------------|
| Denmark/France | 1.088               |                |        |           |             |
| $p$            | 1.000               |                |        |           |             |
| London         | -0.974              | -2.714         |        |           |             |
| $p$            | 1.000               | 0.050          |        |           |             |
| Melbourne      | -0.929              | -2.138         | -0.201 |           |             |
| $p$            | 1.000               | 0.244          | 1.000  |           |             |



|              |        |        |        |        |        |
|--------------|--------|--------|--------|--------|--------|
| Netherlands  | -0.853 | -2.111 | -0.072 | 0.108  |        |
| <i>p</i>     | 1.000  | 0.261  | 1.000  | 1.000  |        |
| Spain/Brazil | -2.366 | -3.720 | -2.014 | -1.456 | -1.611 |

**eFigure 19: Scale for Assessment of Negative Symptoms (composite score) stratified by EU-GEI site**

**a. Box plots for Scale for Assessment of Negative Symptoms (SANS) total composite score, stratified by EU-GEI site**

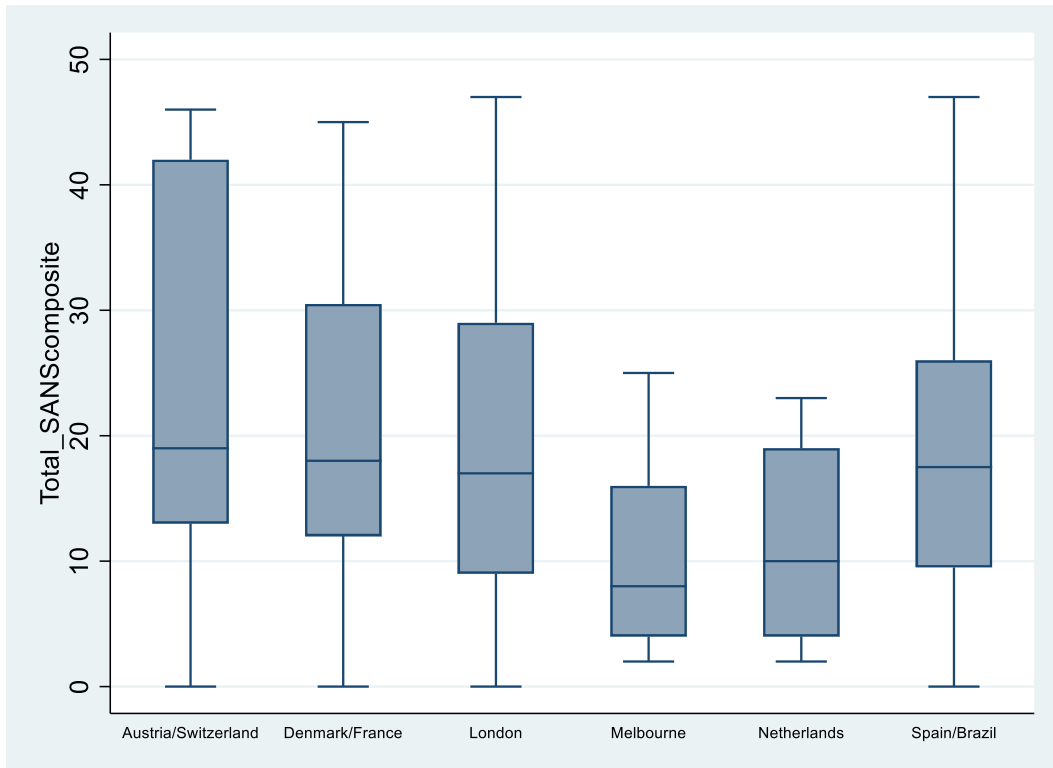

**b. Kruskal-Wallis test**

Chi-sq (5 d.f.): 9.030

*p* = 0.1079

**eFigure 20: Scale for Assessment of Negative Symptoms (global score) stratified by EU-GEI site**

**a. Box plots for Scale for Assessment of Negative Symptoms (SANS) total global score, stratified by EU-GEI site**

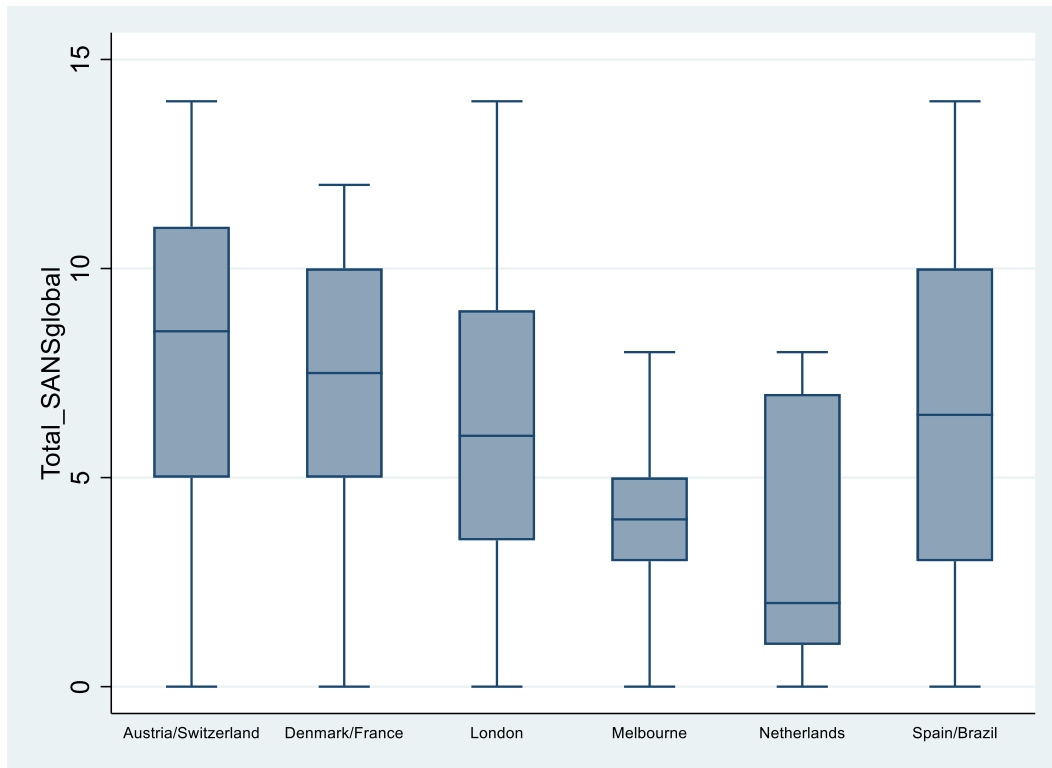

**b. Kruskal-Wallis test**

Chi-sq (5 d.f.): 11.823

$p = 0.0373$

**c. Post-hoc Dunn's test pairwise comparisons with Bonferroni-corrected p values**

|                | Austria/Switzerland | Denmark/France | London | Melbourne | Netherlands |
|----------------|---------------------|----------------|--------|-----------|-------------|
| Denmark/France | 0.159               |                |        |           |             |
| <i>p</i>       | 1.000               |                |        |           |             |
| London         | 0.709               | 0.747          |        |           |             |
| <i>p</i>       | 1.000               | 1.000          |        |           |             |
| Melbourne      | 2.066               | 2.350          | 1.991  |           |             |
| <i>p</i>       | 0.291               | 0.141          | 0.349  |           |             |
|                | 2.194               | 2.540          | 2.195  | 0.071     |             |

Netherlands

|              |       |       |        |        |        |
|--------------|-------|-------|--------|--------|--------|
| $p$          | 0.212 | 0.083 | 0.211  | 1.000  |        |
| Spain/Brazil | 0.519 | 0.460 | -0.075 | -1.615 | -1.739 |
| $p$          | 1.000 | 1.000 | 1.000  | 0.797  | 0.615  |

**eFigure 21: Brief Psychiatric Rating Scale score stratified by EU-GEI site**

**a. Box plots for Brief Psychiatric Rating Scale (BPRS) total score, stratified by EU-GEI site**

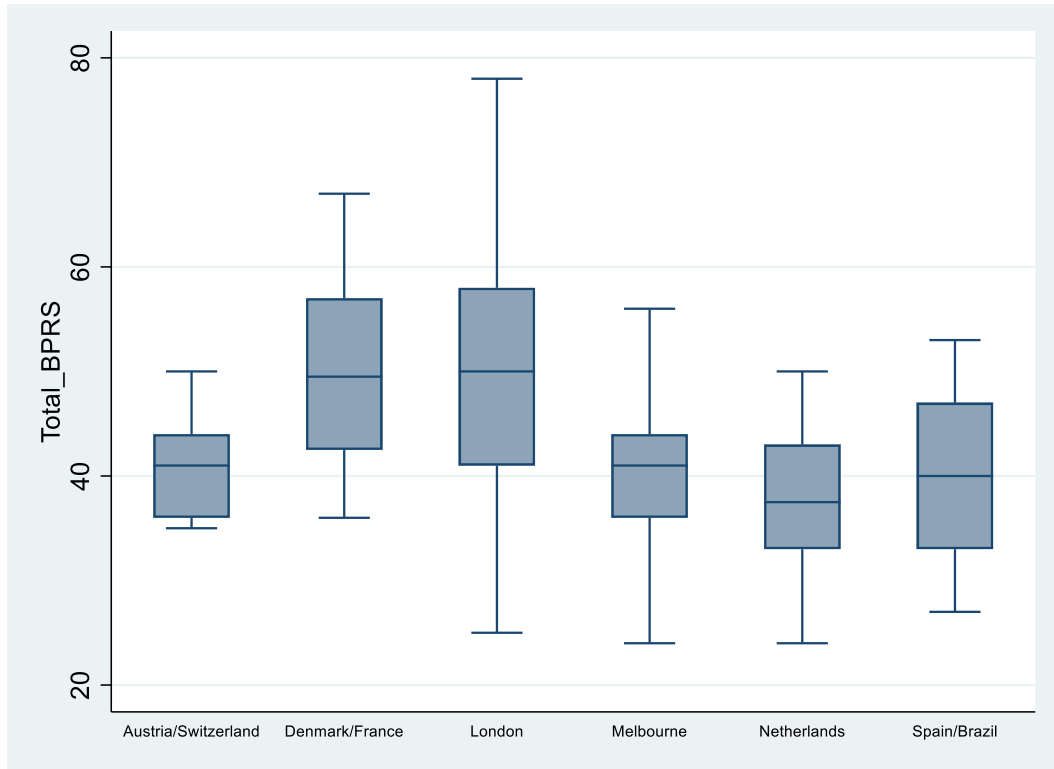

**b. Kruskal-Wallis test**

Chi-sq (5 d.f.): 28.083

$p = 0.0001$

**c. Post-hoc Dunn's test pairwise comparisons with Bonferroni-corrected p values**

|                | Austria/Switzerland | Denmark/France | London | Melbourne | Netherlands |
|----------------|---------------------|----------------|--------|-----------|-------------|
| Denmark/France | -2.426              |                |        |           |             |
| $p$            | 0.114               |                |        |           |             |
| London         | -2.603              | 0.060          |        |           |             |
| $p$            | 0.069               | 1.000          |        |           |             |
| Melbourne      | 0.040               | 2.613          | 2.836  |           |             |

|              |       |              |              |       |        |
|--------------|-------|--------------|--------------|-------|--------|
| $p$          | 1.000 | 0.067        | <b>0.034</b> |       |        |
| Netherlands  | 0.674 | 3.434        | 3.762        | 0.662 |        |
| $p$          | 1.000 | <b>0.005</b> | <b>0.001</b> | 1.000 |        |
| Spain/Brazil | 0.083 | 2.597        | 2.804        | 0.045 | -0.602 |
| $p$          | 1.000 | 0.071        | <b>0.038</b> | 1.000 | 1.000  |

**eFigure 22: Montgomery-Asberg Depression Rating Scale score stratified by EU-GEI site**

**a. Box plots for Montgomery-Asberg Depression Rating Scale (MADRS) total score, stratified by EU-GEI site**

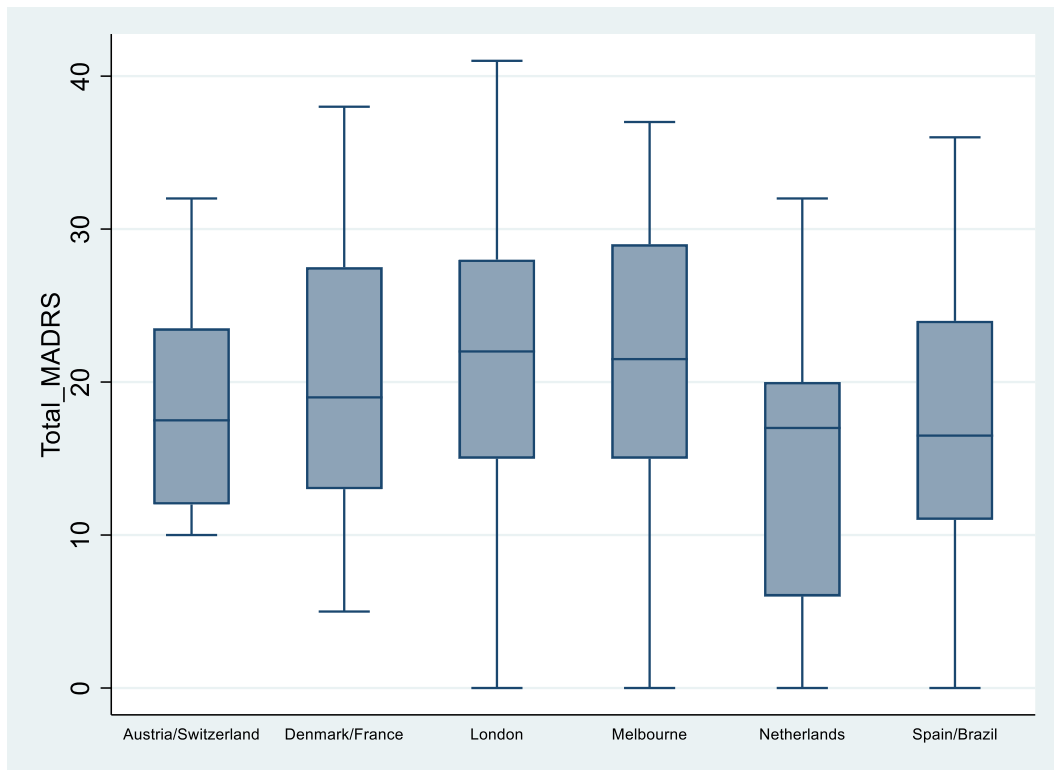

**b. Kruskal-Wallis test**

Chi-sq (5 d.f.): 5.398

$p = 0.3693$

**eFigure 23: Multi-class receiver-operating curves for site prediction based on 69 clinical features from Model 1b**

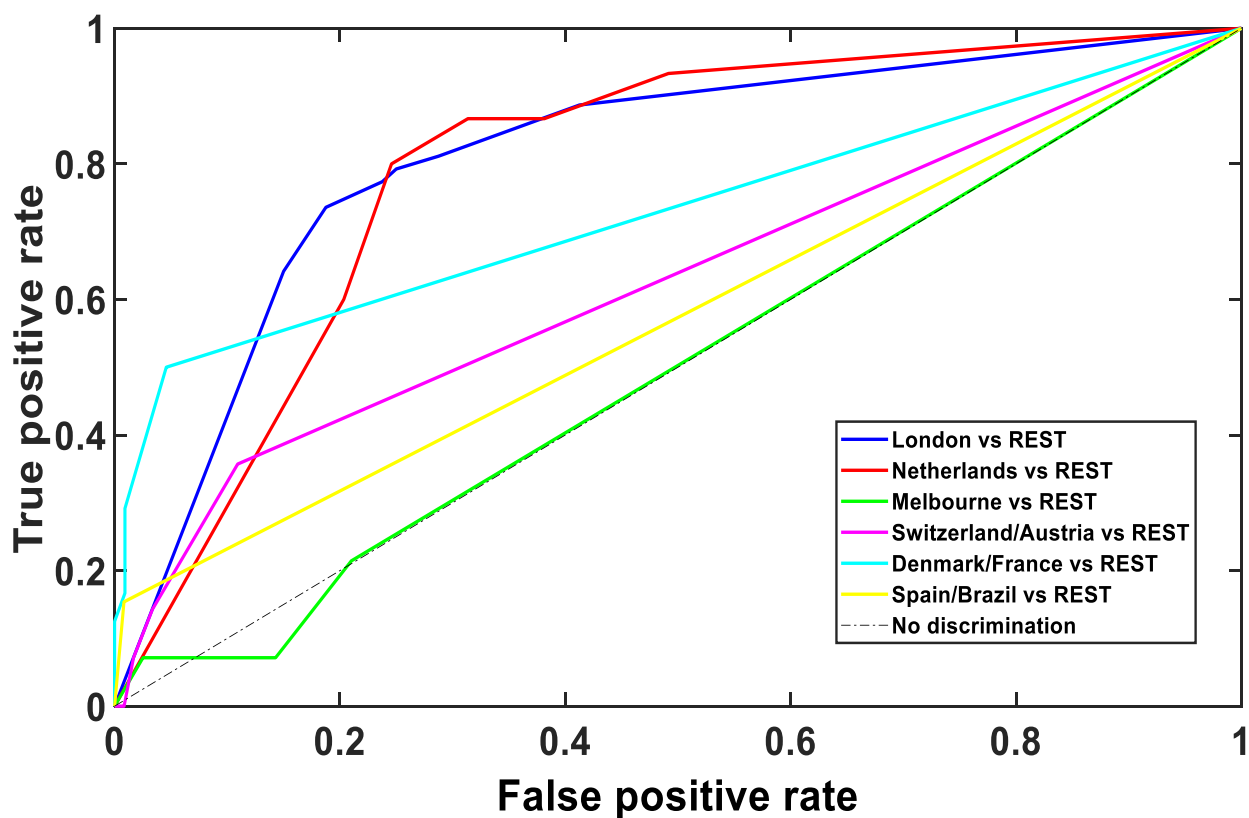

**eFigure 24: Multi-class receiver-operating curves for site prediction based on 166 proteomic features from Model 1c**

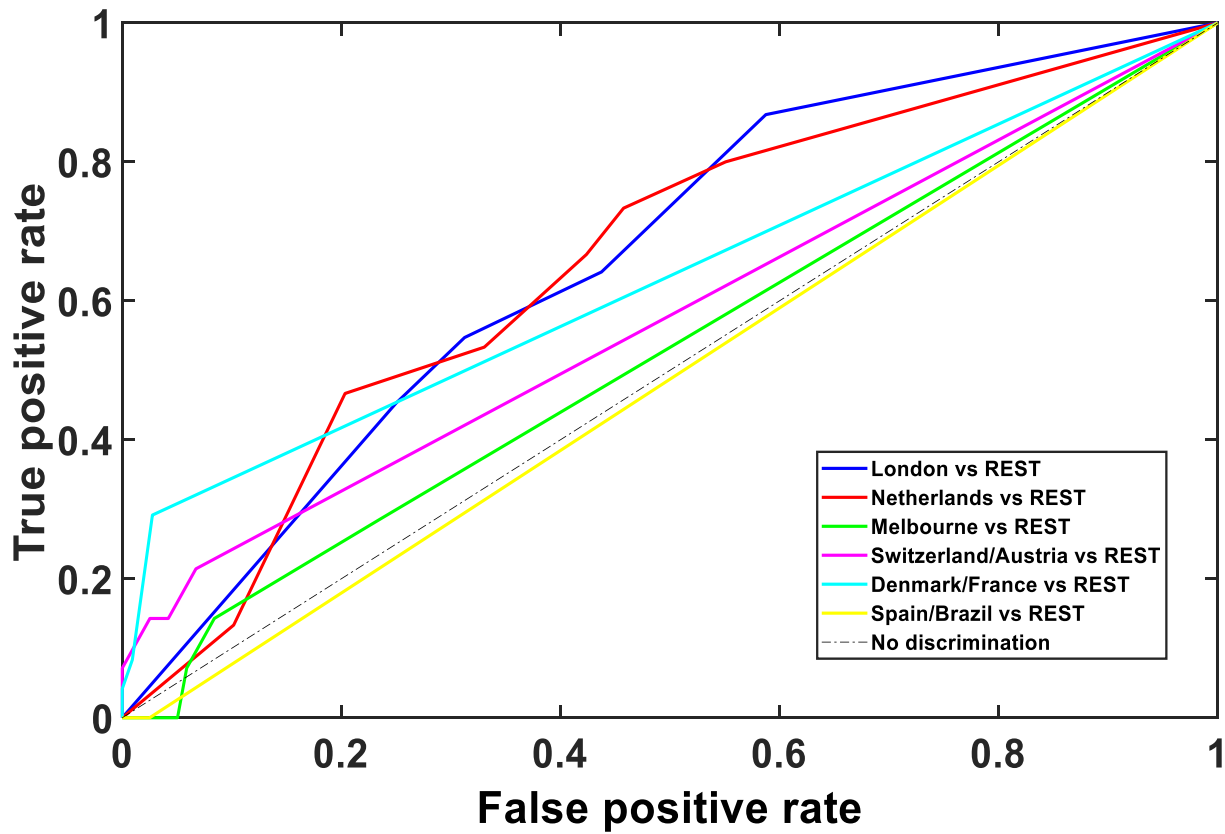

**eFigure 25: Illustration of the complement and coagulation pathways depicting the impact model of differentially expressed complement and coagulation proteins in CHR-T vs. CHR-NT**

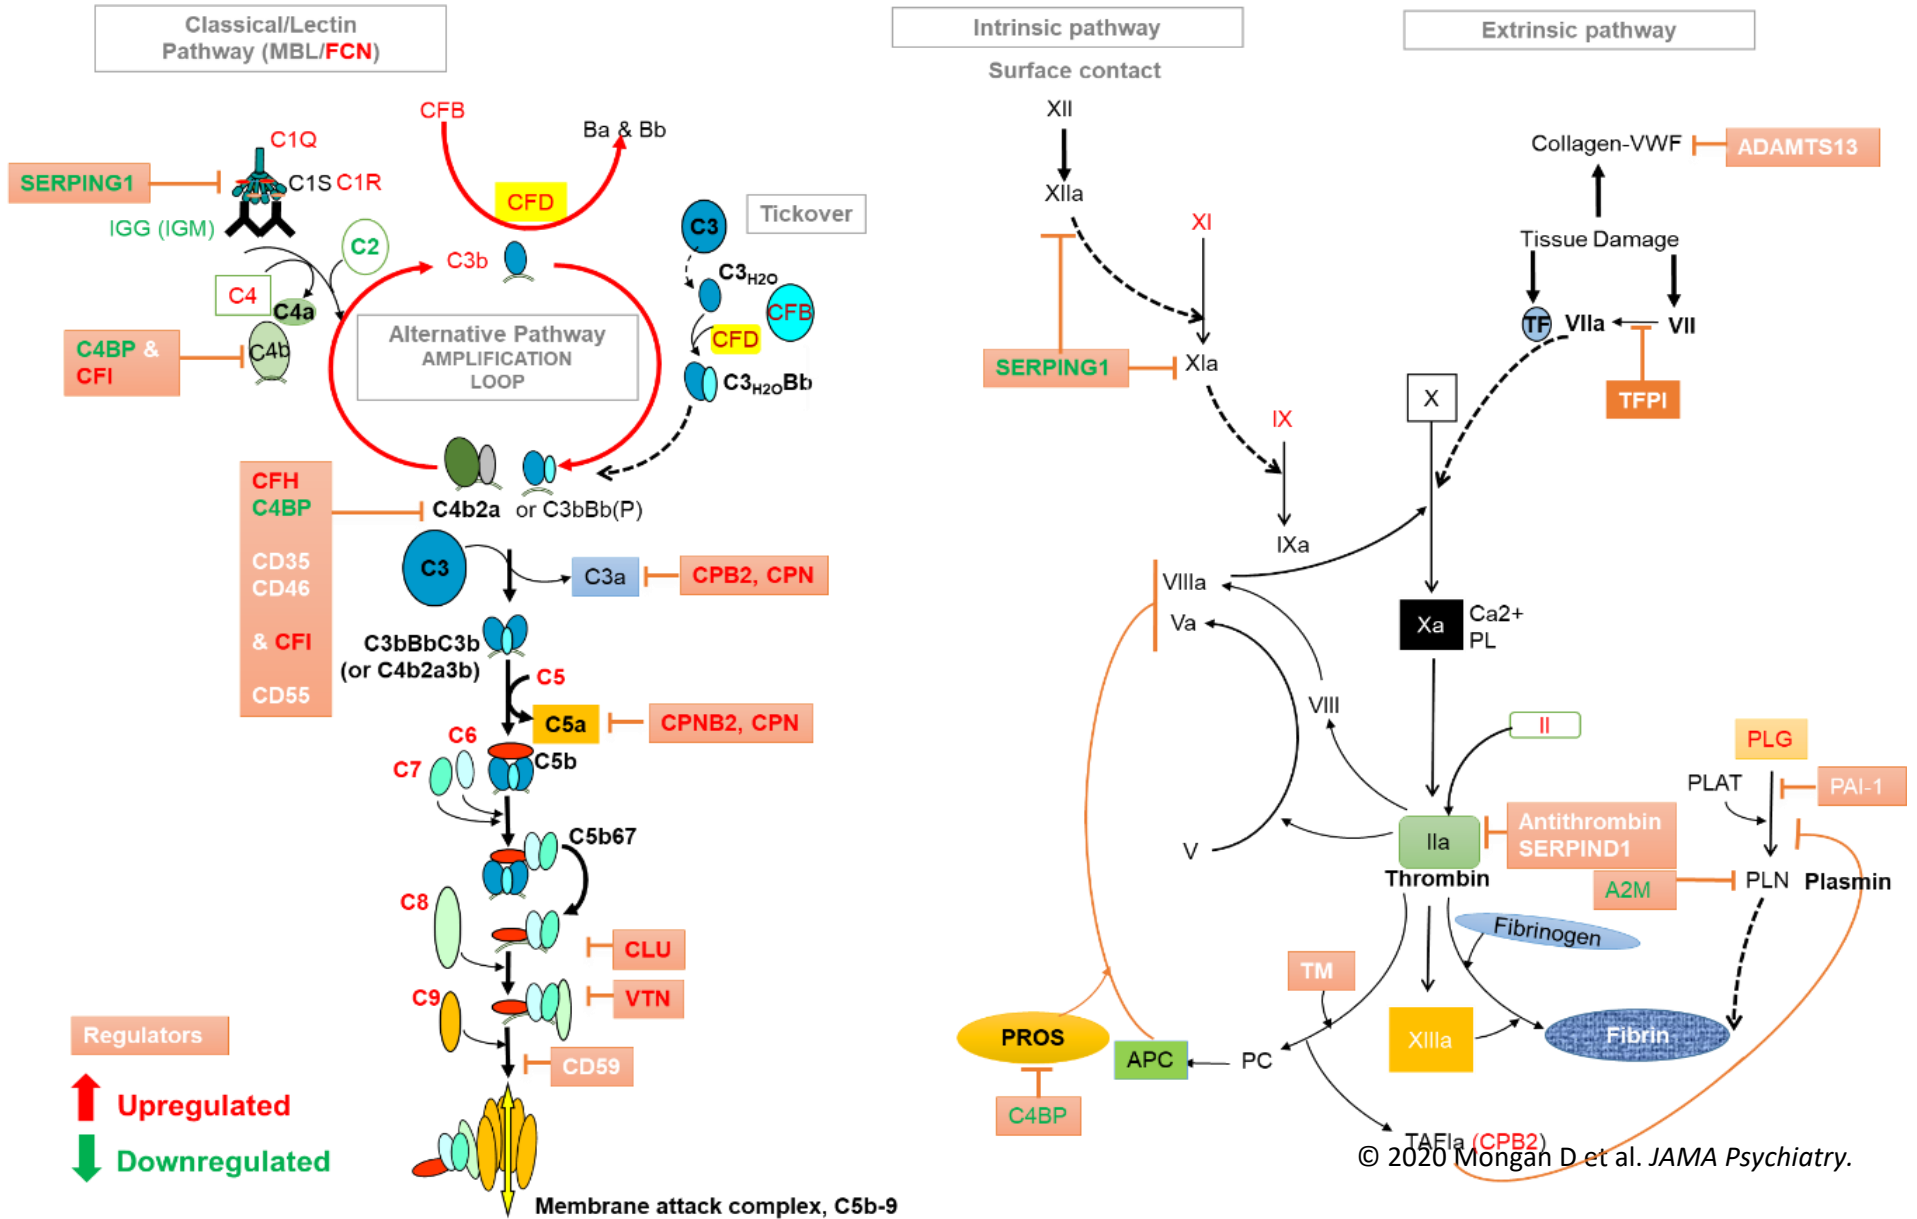

Upregulated proteins shown in red, downregulated components shown in green font colour. Regulatory components are framed in light red boxes.
