# Supplementary material for: Development of Proteomic Prediction Models for Transition to Psychotic Disorder in the Clinical High-Risk State and Psychotic Experiences in Adolescence
Source: PubMed Central journal article supplement (PMC7450406; doi:10.1001/jamapsychiatry.2020.2459), 2020-08-26
Supplement: jamapsychiatry-e202459-s002.pdf [file jamapsychiatry-e202459-s002.pdf]

## Supplementary Online Content

Mongan D, Föcking M, Healy C, et al; European Network of National Schizophrenia Networks Studying Gene-Environment Interactions (EU-GEI) High Risk Study Group. Development of proteomic prediction models for transition to psychotic disorder in the clinical high-risk state and psychotic experiences in adolescence. *JAMA Psychiatry*. Published online August 26, 2020. doi:10.1001/jamapsychiatry.2020.2459

### **eAppendix.**

This supplementary material has been provided by the authors to give readers additional information about their work.







Table with 11 columns: Gene Name, Gene Symbol, RefSeq ID, Start, Stop, Strand, Feature Name, Feature Start, Feature Stop, Feature Type, Feature Text. Lists numerous genes and their genomic coordinates and features.









| Gene | Chromosome | Start (kb) | End (kb) | Strand | Size (kb) | Repeat Count | Repeat Size (bp) | Repeat Type | Repeat Unit (bp) | Repeat Motif | Repeat Index | Repeat Count | Repeat Size (bp) | Repeat Type | Repeat Unit (bp) | Repeat Motif | Repeat Index | Repeat Count | Repeat Size (bp) | Repeat Type | Repeat Unit (bp) | Repeat Motif | Repeat Index | Repeat Count | Repeat Size (bp) | Repeat Type | Repeat Unit (bp) | Repeat Motif | Repeat Index | Repeat Count | Repeat Size (bp) | Repeat Type | Repeat Unit (bp) | Repeat Motif | Repeat Index |      |      |      |      |
|------|------------|------------|----------|--------|-----------|--------------|------------------|-------------|------------------|--------------|--------------|--------------|------------------|-------------|------------------|--------------|--------------|--------------|------------------|-------------|------------------|--------------|--------------|--------------|------------------|-------------|------------------|--------------|--------------|--------------|------------------|-------------|------------------|--------------|--------------|------|------|------|------|
| 1001 | 1          | 1000       | 1000     | +      | 1000      | 1            | 1000             | 1           | 1000             | 1000         | 1            | 1000         | 1                | 1000        | 1000             | 1000         | 1            | 1000         | 1                | 1000        | 1000             | 1000         | 1            | 1000         | 1                | 1000        | 1000             | 1000         | 1000         | 1000         | 1000             | 1000        | 1000             | 1000         | 1000         | 1000 |      |      |      |
| 1002 | 1          | 1000       | 1000     | +      | 1000      | 1            | 1000             | 1           | 1000             | 1000         | 1            | 1000         | 1                | 1000        | 1000             | 1000         | 1            | 1000         | 1                | 1000        | 1000             | 1000         | 1            | 1000         | 1                | 1000        | 1000             | 1000         | 1000         | 1000         | 1000             | 1000        | 1000             | 1000         | 1000         | 1000 | 1000 | 1000 |      |
| 1003 | 1          | 1000       | 1000     | +      | 1000      | 1            | 1000             | 1           | 1000             | 1000         | 1            | 1000         | 1                | 1000        | 1000             | 1000         | 1            | 1000         | 1                | 1000        | 1000             | 1000         | 1            | 1000         | 1                | 1000        | 1000             | 1000         | 1000         | 1000         | 1000             | 1000        | 1000             | 1000         | 1000         | 1000 | 1000 | 1000 | 1000 |



Table with columns for Gene Symbol, Chromosome, Position (kb), RefSeq ID, and p-value. Lists various genes such as MMRN1, MMRN2, MMRN3, etc., with associated genomic coordinates and statistical significance values.

| Symbol  | Company                   | Country | Market | Volume      | Price  | Change | % Change | Open   | High   | Low    | Close  | Adj. Close | Volume      | Price  | Change | % Change | Open   | High   | Low    | Close  | Adj. Close | Volume      | Price  | Change | % Change |
|---------|---------------------------|---------|--------|-------------|--------|--------|----------|--------|--------|--------|--------|------------|-------------|--------|--------|----------|--------|--------|--------|--------|------------|-------------|--------|--------|----------|
| PFIZER  | Pfizer Inc.               | USA     | NASDAQ | 115,310,000 | 28.36  | 0.00   | 0.00     | 28.36  | 28.36  | 28.36  | 28.36  | 28.36      | 115,310,000 | 28.36  | 0.00   | 0.00     | 28.36  | 28.36  | 28.36  | 28.36  | 28.36      | 115,310,000 | 28.36  | 0.00   | 0.00     |
| AMGEN   | Amgen Inc.                | USA     | NASDAQ | 25,840,000  | 110.00 | 0.00   | 0.00     | 110.00 | 110.00 | 110.00 | 110.00 | 110.00     | 25,840,000  | 110.00 | 0.00   | 0.00     | 110.00 | 110.00 | 110.00 | 110.00 | 110.00     | 25,840,000  | 110.00 | 0.00   | 0.00     |
| REGIONS | Regions Financial Corp    | USA     | NASDAQ | 33,260,000  | 18.15  | 0.00   | 0.00     | 18.15  | 18.15  | 18.15  | 18.15  | 18.15      | 33,260,000  | 18.15  | 0.00   | 0.00     | 18.15  | 18.15  | 18.15  | 18.15  | 18.15      | 33,260,000  | 18.15  | 0.00   | 0.00     |
| ROGERS  | Rogers Communications Inc | Canada  | NYSE   | 5,870,000   | 44.75  | 0.00   | 0.00     | 44.75  | 44.75  | 44.75  | 44.75  | 44.75      | 5,870,000   | 44.75  | 0.00   | 0.00     | 44.75  | 44.75  | 44.75  | 44.75  | 44.75      | 5,870,000   | 44.75  | 0.00   | 0.00     |
| UNITED  | United Therapeutics Corp  | USA     | NASDAQ | 3,240,000   | 571.88 | 0.00   | 0.00     | 571.88 | 571.88 | 571.88 | 571.88 | 571.88     | 3,240,000   | 571.88 | 0.00   | 0.00     | 571.88 | 571.88 | 571.88 | 571.88 | 571.88     | 3,240,000   | 571.88 | 0.00   | 0.00     |
| AMGEN   | Amgen Inc.                | USA     | NASDAQ | 25,840,000  | 110.00 | 0.00   | 0.00     | 110.00 | 110.00 | 110.00 | 110.00 | 110.00     | 25,840,000  | 110.00 | 0.00   | 0.00     | 110.00 | 110.00 | 110.00 | 110.00 | 110.00     | 25,840,000  | 110.00 | 0.00   | 0.00     |
| AMGEN   | Amgen Inc.                | USA     | NASDAQ | 25,840,000  | 110.00 | 0.00   | 0.00     | 110.00 | 110.00 | 110.00 | 110.00 | 110.00     | 25,840,000  | 110.00 | 0.00   | 0.00     | 110.00 | 110.00 | 110.00 | 110.00 | 110.00     | 25,840,000  | 110.00 | 0.00   | 0.00     |
| AMGEN   | Amgen Inc.                | USA     | NASDAQ | 25,840,000  | 110.00 | 0.00   | 0.00     | 110.00 | 110.00 | 110.00 | 110.00 | 110.00     | 25,840,000  | 110.00 | 0.00   | 0.00     | 110.00 | 110.00 | 110.00 | 110.00 | 110.00     | 25,840,000  | 110.00 | 0.00   | 0.00     |





Table with multiple columns containing alphanumeric codes, likely representing a list of items or identifiers. The table is organized in a grid-like structure with columns for various categories and values.

| Symbol  | Company Name | Country | Market | ISIN | Exchange | Price | Volume | Value |
|---------|--------------|---------|--------|------|----------|-------|--------|-------|
| AFKOR01 | AFKOR        | AF      | 1      | 1    | 1        | 1     | 1      | 1     |
| AGL01   | AGL          | AG      | 1      | 1    | 1        | 1     | 1      |       |
| AGL02   | AGL          | AG      | 1      | 1    | 1        | 1     | 1      |       |
| AGL03   | AGL          | AG      | 1      | 1    | 1        | 1     | 1      |       |
| AGL04   | AGL          | AG      | 1      | 1    | 1        | 1     | 1      |       |
| AGL05   | AGL          | AG      | 1      | 1    | 1        | 1     | 1      |       |
| AGL06   | AGL          | AG      | 1      | 1    | 1        | 1     | 1      |       |
| AGL07   | AGL          | AG      | 1      | 1    | 1        | 1     | 1      |       |
| AGL08   | AGL          | AG      | 1      | 1    | 1        | 1     | 1      |       |
| AGL09   | AGL          | AG      | 1      | 1    | 1        | 1     | 1      |       |
| AGL10   | AGL          | AG      | 1      | 1    | 1        | 1     | 1      |       |
| AGL11   | AGL          | AG      | 1      | 1    | 1        | 1     | 1      |       |
| AGL12   | AGL          | AG      | 1      | 1    | 1        | 1     | 1      |       |
| AGL13   | AGL          | AG      | 1      | 1    | 1        | 1     | 1      |       |
| AGL14   | AGL          | AG      | 1      | 1    | 1        | 1     | 1      |       |
| AGL15   | AGL          | AG      | 1      | 1    | 1        | 1     | 1      |       |
| AGL16   | AGL          | AG      | 1      | 1    | 1        | 1     | 1      |       |
| AGL17   | AGL          | AG      | 1      | 1    | 1        | 1     | 1      |       |
| AGL18   | AGL          | AG      | 1      | 1    | 1        | 1     | 1      |       |
| AGL19   | AGL          | AG      | 1      | 1    | 1        | 1     | 1      |       |
| AGL20   | AGL          | AG      | 1      | 1    | 1        | 1     | 1      |       |
| AGL21   | AGL          | AG      | 1      | 1    | 1        | 1     | 1      |       |
| AGL22   | AGL          | AG      | 1      | 1    | 1        | 1     | 1      |       |
| AGL23   | AGL          | AG      | 1      | 1    | 1        | 1     | 1      |       |
| AGL24   | AGL          | AG      | 1      | 1    | 1        | 1     | 1      |       |
| AGL25   | AGL          | AG      | 1      | 1    | 1        | 1     | 1      |       |
| AGL26   | AGL          | AG      | 1      | 1    | 1        | 1     | 1      |       |
| AGL27   | AGL          | AG      | 1      | 1    | 1        | 1     | 1      |       |
| AGL28   | AGL          | AG      | 1      | 1    | 1        | 1     | 1      |       |
| AGL29   | AGL          | AG      | 1      | 1    | 1        | 1     | 1      |       |
| AGL30   | AGL          | AG      | 1      | 1    | 1        | 1     | 1      |       |
| AGL31   | AGL          | AG      | 1      | 1    | 1        | 1     | 1      |       |
| AGL32   | AGL          | AG      | 1      | 1    | 1        | 1     | 1      |       |
| AGL33   | AGL          | AG      | 1      | 1    | 1        | 1     | 1      |       |
| AGL34   | AGL          | AG      | 1      | 1    | 1        | 1     | 1      |       |
| AGL35   | AGL          | AG      | 1      | 1    | 1        | 1     | 1      |       |
| AGL36   | AGL          | AG      | 1      | 1    | 1        | 1     | 1      |       |
| AGL37   | AGL          | AG      | 1      | 1    | 1        | 1     | 1      |       |
| AGL38   | AGL          | AG      | 1      | 1    | 1        | 1     | 1      |       |
| AGL39   | AGL          | AG      | 1      | 1    | 1        | 1     | 1      |       |
| AGL40   | AGL          | AG      | 1      | 1    | 1        | 1     | 1      |       |
| AGL41   | AGL          | AG      | 1      | 1    | 1        | 1     | 1      |       |
| AGL42   | AGL          | AG      | 1      | 1    | 1        | 1     | 1      |       |
| AGL43   | AGL          | AG      | 1      | 1    | 1        | 1     | 1      |       |
| AGL44   | AGL          | AG      | 1      | 1    | 1        | 1     | 1      |       |
| AGL45   | AGL          | AG      | 1      | 1    | 1        | 1     | 1      |       |
| AGL46   | AGL          | AG      | 1      | 1    | 1        | 1     | 1      |       |
| AGL47   | AGL          | AG      | 1      | 1    | 1        | 1     | 1      |       |
| AGL48   | AGL          | AG      | 1      | 1    | 1        | 1     | 1      |       |
| AGL49   | AGL          | AG      | 1      | 1    | 1        | 1     | 1      |       |
| AGL50   | AGL          | AG      | 1      | 1    | 1        | 1     | 1      |       |
